# Supplementary material for: Association between low bone mineral density and hearing impairment in postmenopausal women: the Korean National Health and Nutrition Examination Survey
Source: PubMed Central journal article supplement — BMJ Open. 2018 Jan 24;8(1):e018763. doi: 10.1136/bmjopen-2017-018763 (PMC5786079; doi:10.1136/bmjopen-2017-018763), 2018-01-24
Supplement: bmjopen-2017-018763.draft_revisions.pdf [file bmjopen-2017-018763.draft_revisions.pdf]

# BMJ Open

BMJ Open is committed to open peer review. As part of this commitment we make the peer review history of every article we publish publicly available.

When an article is published we post the peer reviewers' comments and the authors' responses online. We also post the versions of the paper that were used during peer review. These are the versions that the peer review comments apply to.

The versions of the paper that follow are the versions that were submitted during the peer review process. They are not the versions of record or the final published versions. They should not be cited or distributed as the published version of this manuscript.

BMJ Open is an open access journal and the full, final, typeset and author-corrected version of record of the manuscript is available on our site with no access controls, subscription charges or pay-per-view fees (<http://bmjopen.bmj.com>).

If you have any questions on BMJ Open's open peer review process please email [editorial.bmjopen@bmj.com](mailto:editorial.bmjopen@bmj.com)

# BMJ Open

## Low Bone Mineral Density is Associated with Hearing Impairment in Postmenopausal Women

|                                 |                                                                                                                                                              |
|---------------------------------|--------------------------------------------------------------------------------------------------------------------------------------------------------------|
| Journal:                        | <i>BMJ Open</i>                                                                                                                                              |
| Manuscript ID                   | bmjopen-2017-018763                                                                                                                                          |
| Article Type:                   | Research                                                                                                                                                     |
| Date Submitted by the Author:   | 01-Aug-2017                                                                                                                                                  |
| Complete List of Authors:       | Lee, Seong-Su; Seoul Natl Univ<br>Han, Kyungdo<br>Joo, Young-Hoon; The Catholic University of Korea, Department of<br>Otolaryngology, Head and Neck Surgery, |
| <b>Primary Subject Heading</b>: | Diabetes and endocrinology                                                                                                                                   |
| Secondary Subject Heading:      | Ear, nose and throat/otolaryngology                                                                                                                          |
| Keywords:                       | hearing impairment, bone mineral density, Epidemiology < TROPICAL<br>MEDICINE                                                                                |
|                                 |                                                                                                                                                              |

SCHOLARONE™  
Manuscripts

Peer Review Only

1  
2  
3  
4 **Low Bone Mineral Density is Associated with Hearing Impairment in Postmenopausal**  
5  
6 **Women**

7  
8  
9  
10 **Seong-Su Lee, MD, PhD,<sup>1</sup> Kyung-do Han, MPH,<sup>2</sup> and Young-Hoon Joo MD, PhD<sup>3</sup>**

11  
12  
13  
14  
15 <sup>1</sup>Division of Endocrinology and Metabolism, Department of Internal Medicine, <sup>2</sup>Department  
16 of Biostatistics, <sup>3</sup>Department of Otolaryngology-Head and Neck Surgery, College of  
17 Medicine, The Catholic University of Korea, Seoul, Korea  
18  
19  
20  
21  
22

23 Running title: Bone Mineral Density and Hearing Status  
24  
25  
26

27 \*Corresponding author: Young-Hoon Joo, MD

28 Department of Otolaryngology, Head and Neck Surgery,

29 Bucheon St. Mary's Hospital, College of Medicine,

30 The Catholic University of Korea

31 2 Sosa-dong, Wonmi-gu, Bucheon,

32 Kyounggi-do 420-717, Republic of Korea

33  
34  
35  
36  
37  
38  
39  
40  
41  
42  
43  
44  
45  
46  
47  
48  
49  
50  
51  
52  
53  
54  
55  
56  
57  
58  
59  
60  
Tel: +82 32 340 7090, Fax: +82 32 340 2674, E-mail: [joodoct@catholic.ac.kr](mailto:joodoct@catholic.ac.kr)

Financial disclosure : none

Conflict of interest : none

## Abstract

**Objective :** We investigated the association between bone mineral density (BMD) and hearing impairment in a nationally representative sample of Korean female adults.

**Study Design :** Cross-sectional analysis of a nationwide health survey.

**Methods :** We studied data from the 2009–2010 Korean National Health and Nutrition Examination Surveys (KNHANES), which included 19,491 participants, 8,773 of whom were enrolled in this study. BMD was measured using dual-energy X-ray absorptiometry. Auditory functioning was evaluated by pure-tone audiometric testing according to established KNHANES protocols. We defined hearing impairment as pure-tone averages (PTA) at frequencies of 0.5, 1.0, 2.0, and 3.0 kHz at a threshold of  $\geq 40$  decibels hearing level (dBHL) in the ear with better hearing status.

**Results:** Among women aged 19 years and older, the prevalences of bilateral hearing impairment in premenopausal and postmenopausal women were  $0.1 \pm 0.1\%$  and  $11.5 \pm 1.1\%$  (mean  $\pm$  SE), respectively. Hearing impairment was significantly associated with low BMD in postmenopausal women. Logistic regression models indicated that lower BMD of the total femur (OR = 0.779; 95% CI = 0.641–0.946,  $p = 0.0118$ ) and femur neck (OR = 0.746; 95% CI = 0.576–0.966,  $p = 0.0265$ ) were significantly associated with hearing impairment among postmenopausal women.

**Conclusions:** Postmenopausal Korean women with low BMD of the total femur and femoral neck showed an increased risk for developing hearing impairment. Further epidemiological and experimental studies are necessary to clarify this association.

**Key words:** hearing impairment, bone mineral density, epidemiology

### **Strengths and limitations of this study**

- We used a nationally representative, cross-sectional, civilian non-institutionalized sample of Korean adults.

- We evaluated the relationships between BMD and hearing level including various social, economic, behavioral, and health variables on the population-based database

- We were unable to analyze the temporal association between hearing impairment and BMD, which may make our results biased.

## Introduction

Osteoporosis has become a major health problem around the world.<sup>1</sup> Approximately 49 million individuals have osteoporosis in North America, Europe, Japan, and Australia.<sup>2</sup> It has been reported that major demographic changes will occur in Asia.<sup>3</sup> Thus, the prevalence and incidence of osteoporosis are expected to increase in this ageing society.<sup>4</sup> Osteoporosis is characterized by the deterioration of the bone microarchitecture and a reduction in the bone mineral density (BMD).<sup>5</sup> Decreased BMD causes demineralization of the skeletal system. Deterioration of the petrous temporal bone, which encases the cochlear capsule and internal auditory canal, may be associated with impaired hearing function.<sup>5-8</sup> Osteoporosis are classically recognized as a significant health care issue in women, but are now increasingly viewed as an important health care problem in men as well.

Adult-onset hearing impairment is the second most common cause of disability among adults in high-income countries.<sup>9</sup> The overall prevalence of audiometric hearing loss among individuals with bilateral hearing loss aged 12 years and older in the United States was 12.7% (30.0 million) between 2001 and 2008, and this increased to 20.3% (48.1 million) when individuals with unilateral hearing loss were included.<sup>10</sup> Hearing impairment can isolate individuals from their social environment, impair psychosocial functioning, impair cognitive skills, increase individual emotional stress, and have negative health effects at the individual and family levels.<sup>11</sup> Furthermore, it has been recently reported that hearing impairment is associated with a risk of depression among adults, particularly women.<sup>12</sup>

Several studies have evaluated the association between BMD and hearing sensitivity. Among rural Caucasian women, it has been reported that low BMD of the femoral neck was associated with hearing impairment.<sup>5</sup> In contrast, no relationship was observed between BMD and hearing impairment among Caucasian or black women; however, black men showed a correlation between BMD of the lower hip and hearing loss.<sup>13,14</sup> There are discrepancies and

1  
2  
3  
4 limitations in previous studies of associations between BMD and hearing impairment,  
5 including differences in race, study design, and measurements of hearing impairment. Thus,  
6 we sought to evaluate the relationship between BMD and hearing impairment in a nationally  
7 representative sample of Korean adults. We hypothesized that hearing impairment was  
8 positively correlated with low BMD in the Korean female or elderly male population.  
9  
10  
11  
12  
13

14 To our knowledge, no nationwide study on hearing impairment, as diagnosed by  
15 otolaryngology doctors, and no study on the association between BMD and hearing  
16 impairment in an Asian female population have been published. Thus, we investigated  
17 association between BMD and hearing impairment in a large representative population  
18 sample from the Korean National Health and Nutrition Examination Surveys (KNHANES).  
19  
20  
21  
22  
23  
24  
25  
26  
27

## 28 **Methods**

### 29 **Study Population**

30 This study was based on data collected in the 2009–2010 KNHANES study conducted by the  
31 Division of Chronic Disease Surveillance, which has been under the supervision of the  
32 Korea's Centers for Disease Control and Prevention since 1998. The KNHANES is a  
33 nationwide survey designed to accurately assess health and nutritional status at the national  
34 level. A field survey team, including an otolaryngologist, an ophthalmologist, and nurses  
35 traveled with a mobile examination unit and performed interviews and physical examinations.  
36 The survey consisted of a health interview, a nutritional survey, and a health examination  
37 survey. The survey collected data via household interviews and by direct standardized  
38 physical examinations conducted in specially equipped mobile examination centers. The  
39 KNHANES methodology has been described in detail previously and further details are listed  
40 in "The 5th KNHANES Sample Design" and reports, made accessible on the KNHANES  
41 website <https://knhanes.cdc.go.kr/knhanes/index.do>. The KNHANES annual reports, user  
42  
43  
44  
45  
46  
47  
48  
49  
50  
51  
52  
53  
54  
55  
56  
57  
58  
59  
60

1  
2  
3  
4 manuals and instructions, and raw data are available on request.<sup>15,16</sup>  
5

6 During 2009–2010, there were 19,491 KNHANES participants. Of these, 10,718 were  
7  
8 excluded from the analysis because of at least one of the following reasons: younger than 19  
9  
10 years; did not undergo the otological, BMD, or 25 hydroxy vitamin D tests; or were missing  
11  
12 data from the lifestyle questionnaire. The final sample included 8,773 8,773 adults aged 19  
13  
14 years and over men, premenopausal, and postmenopausal women were 3,885, 2,622, and  
15  
16 2,266, respectively. Written informed consent was obtained from all participants prior to the  
17  
18 survey. Approval for this study was obtained from the Institutional Review Board of the  
19  
20 Catholic University of Korea, Seoul, Korea. (IRB no. HC14EISE0097; Bucheon, Korea).  
21  
22  
23  
24

### 25 **Bone Mineral Density and Laboratory Measurements**

26  
27 Subjects wore light clothes without shoes and jewelry, which could interfere with the BMD  
28  
29 measurements. BMD was measured by trained technicians at mobile examination centers.  
30  
31 The BMD values of the lumbar spine (L1–L4), femoral neck, and total femur were measured  
32  
33 using dual-energy X-ray absorptiometry (DXA) using a Discovery fan-beam densitometer  
34  
35 (Hologic, Bedford, MA, USA) and the Hologic Discovery software (ver. 3.1). To ensure  
36  
37 DXA quality control, daily automatic calibration was performed according to the  
38  
39 manufacturer's instructions to maintain a precision standard of 1.5% for total hip  
40  
41 measurements.  
42  
43  
44

45 Standing height was measured with the subject looking forward, barefoot, feet  
46  
47 together, arms at the sides, and heels, buttocks, and upper back in contact with the wall.  
48  
49 Height was measured in centimeters to one decimal point using a calibrated stadiometer  
50  
51 (SECA 225 stadiometer, SECA, Hamburg, Germany). Waist circumference (WC) was  
52  
53 measured at the level of the midpoint between the iliac crest and the costal margin at the end  
54  
55 of a normal expiration to the nearest 0.1 cm. Weight was measured using a mobile scale  
56  
57  
58  
59  
60



(GL-6000-20; Cas Korea, Seoul, Korea) in kilograms to one decimal point. Body mass index (BMI) was calculated as weight (kg)/height (m<sup>2</sup>). Blood samples for biochemical analyses and measurement of serum 25-hydroxyvitamin D (25(OH)D) were obtained from all participants, refrigerated immediately, transported to the Central Testing Institute in Seoul, Korea, and analyzed within 24 h.

### **Audiometric Measurements**

Pure-tone audiometric testing was conducted using a SA 203 audiometer (Entomed; Malmö, Sweden). Pure-tone audiometry is a behavioral test used to measure hearing sensitivity.

‘Audiometric’ means ‘measuring the hearing level’. Testing was conducted in a soundproof booth inside a mobile bus reserved for the KNHANES. Otolaryngologists trained to operate the audiometer provided instructions to participants regarding the automated hearing test and obtained the recordings. All audiometric testing was performed under the supervision of an otolaryngologist. Only air conduction thresholds were measured. Air conduction evaluates the whole ear system -- outer, middle, and inner ear. Threshold is defined as the lowest decibel hearing level at which responses occur in at least one half of a series of ascending trials. The minimum number of responses needed to determine the threshold of hearing is two responses out of three presentations at a single level. Supra-auricular headphones were used in the soundproof booth. Supra-auricular’ means ‘situated above the ear coverts’. Automated testing was programmed according to a modified Hughson–Westlake procedure and involved the use of a single pure tone of 1–2 s. The lowest level at which the subject responded to 50% of the pure tone was set as the threshold. The test–retest reliability and validity of the automated hearing test involving air-conducted pure-tone stimuli was good and comparable to those obtained in the manual pure-tone audio test.<sup>17,18</sup> Participants responded by pushing a button when they heard a tone, and the results were recorded automatically. The frequency

1  
2  
3  
4 ranges tested were 0.5, 1.0, 2.0, 3.0, 4.0, and 6.0 kHz. We defined hearing impairment as  
5  
6 pure-tone averages (PTA) of frequencies at 0.5, 1.0, 2.0, and 3.0 kHz at a threshold of  $\geq 40$   
7  
8 decibel hearing level (dBHL) in the ear with better hearing.<sup>19</sup>  
9

10  
11 Participants were asked about their experience of tinnitus: 'Within the past year, have you  
12  
13 ever heard a sound (buzzing, hissing, ringing, humming, roaring, machinery noise)  
14  
15 originating in your ear?' Examiners were instructed to record 'yes' if a participant  
16  
17 reported hearing an odd or unusual sound at any time in the past year. Participants who  
18  
19 responded positively to this question were then queried about the resulting annoyance in their  
20  
21 lives using the following question: 'How annoying is this sound in daily life?' (not  
22  
23 annoying/annoying/severely annoying, and causes sleep problems). The participants were  
24  
25 considered to have tinnitus if the severity of tinnitus was annoying or severely annoying.  
26  
27  
28  
29

### 30 **Lifestyle Habits**

31  
32 Data on medical histories and lifestyle habits were collected using self-report questionnaires.  
33  
34 Participants were categorized into three groups according to smoking history: current smoker,  
35  
36 ex-smoker, and nonsmoker. Subjects who drank more than 30 g of alcohol/day were  
37  
38 designated as drinkers. Regular exercise was defined as strenuous physical activity performed  
39  
40 for at least 20 min at a time at least three times per week. Participants reported their level of  
41  
42 stress as none, mild, moderate, or severe.  
43  
44  
45  
46

### 47 **Statistical Analysis**

48  
49 Statistical analyses were performed using the SAS survey procedure (ver. 9.3; SAS Institute,  
50  
51 Cary, NC, USA) to reflect the complex sampling design and sampling weights of the  
52  
53 KNHANES and to provide nationally representative prevalence estimates. The prevalence  
54  
55 and 95% confidence intervals (CIs) for BMD were calculated. In the univariate analysis, the  
56  
57  
58  
59  
60

1  
2  
3  
4 Rao-Scott  $\chi^2$  test (using PROC SURVEYFREQ in SAS) and logistic regression analysis  
5  
6 (using PROC SURVEYLOGISTIC in SAS) were used to test the association between hearing  
7  
8 impairment and risk factors in a complex sampling design. Participants' characteristics are  
9  
10 expressed as means and standard errors for continuous variables and as percentages for  
11  
12 categorical variables. To examine the association of hearing level and BMD, the participants  
13  
14 were divided into quartiles based on levels of BMD (Q1–Q4). Simple and multiple linear  
15  
16 regression analyses were used to examine the association between hearing impairment and  
17  
18 BMD.  
19  
20

21 We first adjusted for age and BMI (model 1) and then adjusted for the variables in  
22  
23 model 1 as well as for smoking status, alcohol intake, exercise, education, and income  
24  
25 (model 2). Model 3 was adjusted for the variables in model 2 and for vitamin D, stress, and  
26  
27 tinnitus. P-values were two-tailed, and P values < 0.05 were considered statistically  
28  
29 significant.  
30  
31  
32  
33

## 34 Results

35  
36 Of the 4,888 female participants aged  $\geq 19$  years, 2,622 and 2,266 were premenopausal and  
37  
38 postmenopausal, respectively. Table 1 shows baseline characteristics of men, premenopausal  
39  
40 and postmenopausal women. The mean age of men, premenopausal, and postmenopausal  
41  
42 women was  $43.9 \pm 0.3$ ,  $35.3 \pm 0.2$  and  $62.7 \pm 0.3$  years, respectively. The prevalence of bilateral  
43  
44 hearing impairment in the postmenopausal women was  $11.5 \pm 1.1\%$  (mean  $\pm$  SE).  
45  
46 Postmenopausal women were less likely to drink alcohol, more likely to have a low income,  
47  
48 compared with men and premenopausal women. The mean values of BMI, WC, and vitamin  
49  
50 D were higher among postmenopausal women than among premenopausal women. The  
51  
52 BMDs of the lumbar spine, total femur, and femoral neck were lower in postmenopausal  
53  
54 women than in men premenopausal women. Table 2 shows subject characteristics according  
55  
56  
57  
58  
59  
60

1  
2  
3  
4 to bilateral hearing impairment.

5  
6 After categorizing subjects into four groups based on the percentage of BMD (quartile 1,  
7 with the highest, to quartile 4, with the lowest), we used analysis of covariance (ANCOVA)  
8 to investigate hearing level according to BMD quartile at various skeletal sites after adjusting  
9 for confounding variables, such as age, body mass index, smoking status, alcohol intake,  
10 regular exercise, educational level, income, 25-hydroxy vitamin D, stress level, and tinnitus.  
11 Lumbar spine, total femur, and femoral neck BMD in postmenopausal women showed  
12 significantly decreased tendencies in hearing level as BMD decreased in quartiles ( $P <$   
13  $0.0001$ ; Fig. 1). However, the BMD at the lumbar spine ( $P = 0.570$ ), total femur ( $P = 0.358$ ),  
14 and femur neck ( $P = 0.268$ ) of premenopausal women showed no statistically significantly  
15 association with hearing level. Also those of men showed no statistically significantly  
16 association with hearing level.

17  
18 Table 3 shows the relationship between hearing impairment and BMD using logistic  
19 regression models. In the final regression model for hearing impairment, the BMDs of the  
20 total femur (OR = 0.779; 95% CI = 0.641–0.946) and femoral neck (OR = 0.746; 95% CI =  
21 0.576–0.966) were significantly associated with hearing impairment among postmenopausal  
22 women after adjusting for age, body mass index, smoking status, alcohol intake, regular  
23 exercise, educational level, income, vitamin D, stress level, and tinnitus (Model 3). BMD at  
24 the lumbar spine (OR = 0.525; 95% CI = 0.279–0.989) was also significantly associated with  
25 hearing impairment in premenopausal women. BMD at the total femur, and femoral neck in  
26 men and premenopausal women did not show a significant correlation with hearing  
27 impairment. To determine the associations in between hearing impairment and BMD at  
28 various skeletal sites, simple linear logistic regression analysis was performed after adjusting  
29 for age, BMI, smoking status, alcohol intake, regular exercise, educational level, income, 25-  
30 hydroxyvitamin D, stress level, and tinnitus. There was no statistically significant correlations  
31  
32  
33  
34  
35  
36  
37  
38  
39  
40  
41  
42  
43  
44  
45  
46  
47  
48  
49  
50  
51  
52  
53  
54  
55  
56  
57  
58  
59  
60

1  
2  
3  
4 in hearing impairment and BMD at any parts of skeletal sites in men, premenopausal and  
5  
6 postmenopausal women (Table 4).  
7  
8  
9

## 10 **Discussion**

11  
12 The primary objective of this study was to examine the relationship between BMD and  
13 hearing impairment using a nationally representative sample of the South Korean population.  
14  
15 Our findings indicate that low BMDs of the total femur and femur neck were associated with  
16  
17 an increased risk for impairment of hearing function in postmenopausal women.  
18  
19  
20

21 There have been some previous reports that reduced BMD was closely associated with  
22 hearing impairment.<sup>5,13</sup> The bone mass of the femoral neck was associated with hearing loss  
23 in a population of rural women aged 60–85 years.<sup>5</sup> Another study enrolled 2052 older adults  
24 aged 73–84 years using a randomized method. The population was composed of white men  
25 (32.2%), white women (30.8%), black men (15.1%), and black women (22.0%). The results  
26 showed that the BMD of the total hip was not associated with hearing loss in white men,  
27 white women, and black women, but it was in black men.<sup>13</sup> Unlike our results, that study  
28 checked only the BMD of the total hip, and the age range and race of the sample also differed  
29 from those of ours. However, the study did show that there were differences in hearing  
30 impairment by race and gender.  
31  
32  
33  
34  
35  
36  
37  
38  
39  
40  
41  
42

43 The mechanism of hearing impairment in postmenopausal women with lower BMD may  
44 be that demineralization of cochlear capsule of the temporal bone could lead to loss of the  
45 delicate stereocilia of the cochlear.<sup>14</sup> The cochlear capsule is located in the petrous portion of  
46 the temporal bone. This portion is composed primarily of cancellous bone components.<sup>20</sup> The  
47 demineralization of the cochlear capsule has been associated with hearing loss in subjects  
48 with bone diseases, such as Paget's disease, otosclerosis, and osteogenesis imperfecta.<sup>7,14,21</sup>  
49  
50 Deteriorated auditory function at a specific frequency has been associated with lower BMD  
51  
52  
53  
54  
55  
56  
57  
58  
59  
60

1  
2  
3  
4 within the cochlear capsule.<sup>22</sup> Demineralization of the petrous temporal bone affects the  
5  
6 encasing compartment of the cochlear capsule. Spiral ligament hyalinization may be affected  
7  
8 by the toxic effects of enzymes released from otospongiotic foci and can lead to hearing  
9  
10 impairment.<sup>21</sup> Lower BMD of the petrous portion of the temporal bone can affect the  
11  
12 dissipation of cochlear stereocilia and could be a cause of hearing loss in patients with  
13  
14 sensorineural hearing loss.<sup>22</sup> This phenomenon supports the occurrence of age-related  
15  
16 sensorineural loss and the fact that the severity of cochlear hearing loss is influenced by the  
17  
18 extent of cochlear demineralization.<sup>5,23</sup>

21 Our study showed that differences related to menopause may contribute to relationships  
22  
23 between bone mass and hearing impairment. In this respect, it has been reported that estrogen  
24  
25 can exert a positive effect on hearing among older women.<sup>24</sup> Furthermore, estradiol treatment  
26  
27 may have a positive effect on the ionic homeostasis of the inner ear and the protection of  
28  
29 activated intermediated filaments.<sup>25</sup> Thus, the role of estrogen suggests differences in hearing  
30  
31 impairment among women, such as those between women at the premenopausal and  
32  
33 postmenopausal stages.<sup>26,27</sup> Estrogen may have an important role in the maintenance or repair  
34  
35 of sensory epithelia of the inner ear and may act as an auditory protectant.<sup>28-30</sup>

38 The screening for hearing impairment is important. Because patients, clinicians, family,  
39  
40 and healthcare staff often do not recognize hearing loss, particularly in its early stages, this  
41  
42 condition may be undertreated.<sup>31</sup> In addition, hearing impairment may favor the development  
43  
44 of dementia and cognitive dysfunction in adults aged 65 years and older.<sup>32</sup> Hearing  
45  
46 impairment is positively correlated with depression among US adults of all ages, particularly  
47  
48 among women and those younger than 70 years.<sup>12</sup> Therefore, screening tests based on risk  
49  
50 factors are essential, and physicians should be aware of the possibility of hearing impairment  
51  
52 in postmenopausal women.  
53  
54  
55  
56  
57  
58  
59  
60

1  
2  
3  
4 Our study has several limitations. First, we did not directly measure the BMD of the  
5 cochlear capsule of the temporal bone. There are no data on any association of the BMD  
6 between the in the petrous portion of the temporal bone and that of the appendicular skeleton.  
7  
8 However, previous research has indicated that osteoporosis can affect the skull bones.  
9  
10 Patients with hyperthyroid-related osteoporosis suffered from decreased skull bone density,  
11 and demineralization of the petrous portion of the temporal bone has been seen in subjects  
12 with severe osteoporosis.<sup>33,34</sup> It has been reported that high-resolution computed tomography  
13 was useful for checking the association between the BMD of the petrous portion of the  
14 temporal bone and hearing loss.<sup>35</sup> Under ideal conditions, the BMD of the petrous portion of  
15 the temporal bone would be measured; however, there is no feasible or accurate method for  
16 measuring BMD in large populations. Second, we were unable to analyze the temporal  
17 association between hearing impairment and BMD. Adequate assessment of the presence of  
18 hearing impairment is limited for prolonged periods. Thus, our study is unable to examine  
19 hearing variability in these populations. Despite these limitations, however, no previous study  
20 has evaluated the association between hearing impairment and low BMD in a representative  
21 general female population in Asia. Additionally, these results may be reliable because the  
22 data used were obtained from a government-sponsored survey of the national population of  
23 South Korea and were qualified by DXA, validated by audiometry tests, and verified by  
24 otolaryngologists.  
25  
26  
27  
28  
29  
30  
31  
32  
33  
34  
35  
36  
37  
38  
39  
40  
41  
42  
43  
44  
45  
46

## 47 Conclusion

48  
49 We found that low BMD in the total femur and femoral neck were associated with  
50 impaired hearing status in postmenopausal women. Future longitudinal studies with larger  
51 sample sizes and controls for potential confounders are needed to confirm the association  
52 between hearing impairment and postmenopause.  
53  
54  
55  
56  
57  
58  
59  
60

## Acknowledgements

We are grateful to the 150 medical residents of the otorhinolaryngology departments of the 47 training hospitals in South Korea who are members of the Division of Chronic Disease Surveillance of Korea's Centers for Disease Control & Prevention for their participation in this survey and for their dedicated work.

Contributors : SSL wrote the first draft of the manuscript and took part in the data analyses. KDH performed statistical analyses. YHJ designed the study and critically revised the manuscript for important intellectual content.

Competing interests : None declared.

Funding : There are no funders to report for this study.

Data sharing statement : The KNHANES methodology has been described in detail previously and further details are listed in "The 5th KNHANES Sample Design" and reports, made accessible on the KNHANES website <https://knhanes.cdc.go.kr/knhanes/index.do>. The KNHANES annual reports, user manuals and instructions, and raw data are available on request.



## References

1. World Health Organization. Prevention and management of osteoporosis. World Health Organ. Tech. Rep. Ser. 2003;921:1–164, back cover.
2. Wade SW, Strader C, Fitzpatrick LA, Anthony MS, O'Malley CD. Estimating prevalence of osteoporosis: examples from industrialized countries. Arch Osteoporos. 2014;9:182.
3. Gullberg B, Johnell O, Kanis JA. World-wide projections for hip fracture. Osteoporos Int. 1997;7:407–413.
4. Cole ZA, Dennison EM, Cooper C. Osteoporosis epidemiology update. Curr Rheumatol Rep. 2008;10:92–96.
5. Clark K, Sowers MR, Wallace RB, Jannausch ML, Lemke J, Anderson CV. Age-related hearing loss and bone mass in a population of rural women aged 60 to 85 years. Ann. Epidemiol. 1995;5:8–14.
6. Petasnick JP. Tomography of the temporal bone in Paget's disease. Am. J. Roentgenol. Radium Ther. Nucl. Med. 1969;105:838–843.
7. Huizing EH, de Groot JA. Densitometry of the cochlear capsule and correlation between bone density loss and bone conduction hearing loss in otosclerosis. Acta Otolaryngologica. 1987;103:464–468.
8. Chakeres DW, Weider DJ. Computed tomography of the ossicles. Neuroradiology. 1985;27:99–107.
9. World Health Organization. The Global Burden of Disease: 2004 Update. 2008; [http://www.who.int/healthinfo/global\\_burden\\_disease/2004\\_report\\_update/en/](http://www.who.int/healthinfo/global_burden_disease/2004_report_update/en/).
10. Lin FR, Niparko JK, Ferrucci L. Hearing loss prevalence in the United States. Arch Intern Med. 2011;171:1851–1852.
11. Hogan A, O'Loughlin K, Miller P, Kendig H. The health impact of a hearing

1  
2  
3  
4 disability on older people in Australia. *J Aging Health*. 2009;21:1098–1111.

5  
6 12. Li CM, Zhang X, Hoffman HJ, Cotch MF, Themann CL, Wilson MR. Hearing  
7  
8 impairment associated with depression in US adults, National Health and Nutrition  
9  
10 Examination Survey 2005–2010. *JAMA Otolaryngol Head Neck Surg*. 2014;140:293–302.

11  
12 13. Helzner EP, Cauley JA, Pratt SR, et al. Race and sex differences in age-related  
13  
14 hearing loss: the Health, Aging and Body Composition Study. *J Am Geriatr Soc*.  
15  
16 2005;53:2119–2127.

17  
18 14. Helzner EP, Cauley JA, Pratt SR, et al. Hearing sensitivity and bone mineral density  
19  
20 in older adults: the Health, Aging and Body Composition Study. *Osteoporos. Int*.  
21  
22 2005;16:1675–1682.

23  
24 15. Park SH, Lee KS, Park HY. Dietary carbohydrate intake is associated with  
25  
26 cardiovascular disease risk in Korean: analysis of the third Korea National Health and  
27  
28 Nutrition Examination Survey (KNHANES III). *Int. J. Cardiol*. 2010;139:234–240.

29  
30 16. Park HA. The Korea National Health and Nutrition Examination Survey as a primary  
31  
32 data source. *Korean J Fam Med*. 2013;34:79.

33  
34 17. Swanepoel de W, Mngemane S, Molemong S, Mkwanzazi H, Tutshini S. Hearing  
35  
36 assessment-reliability, accuracy, and efficiency of automated audiometry. *Telemed J E Health*.  
37  
38 2010;16:557–563.

39  
40 18. Mahomed F, Swanepoel de W, Eikelboom RH, Soer M. Validity of automated  
41  
42 threshold audiometry: a systematic review and meta-analysis. *Ear and Hearing*. 2013;34:745–  
43  
44 752.

45  
46 19. World Health Organization. Millions of people in the world have hearing loss that  
47  
48 can be treated or prevented: 2013 update. WHO/NMH/PBD 2013.04;  
49  
50 <http://www.who.int/pbd/deafness/news/Millionslivewithhearingloss.pdf>

51  
52 20. Swinnen FK, De Leenheer EM, Goemaere S, Cremers CW, Coucke PJ, Dhooge IJ.

1  
2  
3  
4 Association between bone mineral density and hearing loss in osteogenesis imperfecta.  
5  
6 Laryngoscope. 2012;122:401–408.  
7

8 21. Guneri EA, Ada E, Ceryan K, Guneri A. High-resolution computed tomographic  
9  
10 evaluation of the cochlear capsule in otosclerosis: relationship between densitometry and  
11  
12 sensorineural hearing loss. The Annals of Otology, Rhinology, and Laryngology.  
13  
14 1996;105:659–664.  
15

16 22. Swartz JD, Mandell DW, Berman SE, Wolfson RJ, Marlowe FI, Popky GL. Cochlear  
17  
18 otosclerosis (otospongiosis): CT analysis with audiometric correlation. Radiology.  
19  
20 1985;155:147–150.  
21  
22

23 23. Mendy A, Vieira ER, Albatineh AN, Nnadi AK, Lowry D, Gasana J. Low bone  
24  
25 mineral density is associated with balance and hearing impairments. Ann. Epidemiol.  
26  
27 2014;24:58–62.  
28

29 24. Frisina RD, Frisina DR. Physiological and neurobiological bases of age-related  
30  
31 hearing loss: biotherapeutic implications. American Journal of Audiology. 2013;22:299–302.  
32  
33

34 25. Horner KC, Troadec JD, Dallaporta M, Pio J. Effect of chronic estradiol  
35  
36 administration on vimentin and GFAP immunohistochemistry within the inner ear. Neurobiol  
37  
38 Dis. 2009;35:201–208.  
39

40 26. Gordon-Salant S. Hearing loss and aging: new research findings and clinical  
41  
42 implications. Journal of Rehabilitation Research and Development. 2005;42:9–24.  
43  
44

45 27. Pearson JD, Morrell CH, Gordon-Salant S, et al. Gender differences in a longitudinal  
46  
47 study of age-associated hearing loss. The Journal of the Acoustical Society of America.  
48  
49 1995;97:1196–1205.  
50

51 28. Sajjan SA, Warchol ME, Lovett M. Toward a systems biology of mouse inner ear  
52  
53 organogenesis: gene expression pathways, patterns and network analysis. Genetics.  
54  
55 2007;177:631–653.  
56  
57  
58  
59  
60

- 1  
2  
3  
4 29. McCullar JS, Oesterle EC. Cellular targets of estrogen signaling in regeneration of  
5 inner ear sensory epithelia. *Hearing Research*. 2009;252:61–70.  
6  
7  
8 30. Nolan LS, Maier H, Hermans-Borgmeyer I, et al. Estrogen-related receptor gamma  
9 and hearing function: evidence of a role in humans and mice. *Neurobiology of Aging*.  
10 2013;34:2077 e2071–2079.  
11  
12  
13 31. Pacala J, Yueh B. Hearing deficits in the older patient: "I didn't notice anything".  
14 *JAMA*. 2012;307:1185–1194.  
15  
16  
17 32. Gurgel RK, Ward PD, Schwartz S, Norton MC, Foster NL, Tschanz JT. Relationship  
18 of hearing loss and dementia: a prospective, population-based study. *Otology & Neurotology*:  
19 Official Publication of the American Otological Society, American Neurotology Society [and]  
20 European Academy of Otology and Neurotology. 2014;35:775–781.  
21  
22  
23 33. Meunier P, Bianchi G, Edouard C, Bernard J, Courpron P, Vignon G. Bony  
24 manifestations of thyrotoxicosis. *Orthop Clin North Am*. 1972;3:745–774.  
25  
26  
27 34. Khan A, Lore JM, Jr. Osteoporosis relative to head and neck. *J Med*. 1984;15:279–  
28 284.  
29  
30  
31 35. Güneri EA, Ada E, Ceryan K, Güneri A. High-resolution computed tomographic  
32 evaluation of the cochlear capsule in otosclerosis: relationship between densitometry and  
33 sensorineural hearing loss. *The Annals of Otology, Rhinology & Laryngology*.  
34 1996;105:659–664.  
35  
36  
37  
38  
39  
40  
41  
42  
43  
44  
45  
46  
47  
48  
49  
50  
51  
52  
53  
54  
55  
56  
57  
58  
59  
60

**TABLE 1. SUBJECT CHARACTERISTICS**

|                                          | Men<br>(n=3885) | Premenopausal<br>women (n=2622) | Postmenopausal<br>women (n=2266) | p-value  |
|------------------------------------------|-----------------|---------------------------------|----------------------------------|----------|
| Age (years)                              | 43.9±0.3        | 35.3±0.2                        | 62.7±0.3                         | <0.0001* |
| Average hearing level (dB)               | 19.1±0.4        | 12.3±0.4                        | 30.6±0.8                         | <0.0001* |
| Smoking - Current smoker (%)             | 45.4±1.0        | 7.1±0.7                         | 4.6±0.6                          | <0.0001* |
| Drinking - Heavy drinker (%)             | 18.2±0.8        | 2.6±0.4                         | 0.9±0.2                          | <0.0001* |
| Routine exercise (%)                     | 27.3±0.8        | 21.3±1.0                        | 22.6±1.3                         | <0.0001* |
| Body mass index (kg/m <sup>2</sup> )     | 24.1±0.1        | 22.6±0.1                        | 24.3±0.1                         | <0.0001* |
| Waist circumference (cm)                 | 84.0±0.2        | 74.8±0.3                        | 82.3±0.3                         | <0.0001* |
| Education - ≥High school (%)             | 77.0±0.9        | 89.7±0.7                        | 20.7±1.3                         | <0.0001* |
| Residential area - Urban (%)             | 80.1±2.3        | 85.8±2.0                        | 73.2±2.9                         | <0.0001* |
| Income - Lower quartile (%)              | 14.5±0.8        | 9.6±0.8                         | 33.0±1.4                         | <0.0001* |
| Stress – Moderate to severe (%)          | 27.4±0.9        | 35.2±1.1                        | 29.8±1.3                         | <0.0001* |
| 25-Hydroxyvitamin D (ng/ml)              | 19.8±0.2        | 16.4±0.2                        | 19.0±0.3                         | <0.0001* |
| BMD of lumbar spine (g/cm <sup>2</sup> ) | 0.971±0.003     | 0.977±0.003                     | 0.807±0.004                      | <0.0001* |
| BMD of total femur (g/cm <sup>2</sup> )  | 0.986±0.003     | 0.905±0.003                     | 0.782±0.003                      | <0.0001* |
| BMD of femoral neck (g/cm <sup>2</sup> ) | 0.829±0.003     | 0.765±0.003                     | 0.626±0.003                      | <0.0001* |

\* P < 0.05 was considered to be statistically significant.

**TABLE 2. SUBJECT CHARACTERISTICS ACCORDING TO BILATER HEARING IMPAIRMENT**

|                                          | Bilateral Hearing Impairment |                 | p-value |
|------------------------------------------|------------------------------|-----------------|---------|
|                                          | No<br>(n= 8214)              | Yes<br>(n= 559) |         |
| Age (years)                              | 43.6 ±0.3                    | 69.9±0.6        | <0.0001 |
| Average hearing level (dB)               | 10.5±0.2                     | 57.1±1.5        | <0.0001 |
| Smoking - Current smoker (%)             | 26.3±1.2                     | 19.5±4.5        | 0.0086  |
| Drinking - Heavy drinker (%)             | 10.3±0.9                     | 6.7±2.6         | 0.0311  |
| Routine exercise (%)                     | 24.9±1.4                     | 18.9±3.8        | 0.0052  |
| Body mass index (kg/m <sup>2</sup> )     | 23.7±0.0                     | 23.8±0.2        | 0.3586  |
| Waist circumference (cm)                 | 80.7±0.2                     | 83.7±0.5        | <0.0001 |
| Education - ≥High school (%)             | 73.0±1.8                     | 14.6±3.8        | <0.0001 |
| Residential area - Urban (%)             | 81.1±4.5                     | 67.7±8.6        | <0.0001 |
| Income - Lower quartile (%)              | 14.9±1.5                     | 50.0±4.8        | <0.0001 |
| Stress – Moderate to severe (%)          | 30.4±1.3                     | 25.8±5.1        | 0.0937  |
| 25-Hydroxyvitamin D (ng/ml)              | 18.5±0.2                     | 20.2±0.6        | 0.0013  |
| BMD of lumbar spine (g/cm <sup>2</sup> ) | 0.947±0.002                  | 0.841±0.008     | <0.0001 |
| BMD of total femur (g/cm <sup>2</sup> )  | 0.929±0.002                  | 0.799±0.008     | <0.0001 |
| BMD of femoral neck (g/cm <sup>2</sup> ) | 0.778±0.002                  | 0.629±0.008     | <0.0001 |

Data are presented as mean ± SE ( standard error)

TABLE 3. MULTIVARIABLE LOGISTIC REGRESSION ANALYSIS OF ADJUSTED ODD RATIOS (ORs) AND 95% CONFIDENCE INTERVALS (CIs) TO DETERMINE THE EFFECT OF BONE MINERAL DENSITY ON HEARING IMPAIRMENT.

|              | Men                | Premenopausal women | Postmenopausal women |
|--------------|--------------------|---------------------|----------------------|
| Lumbar spine |                    |                     |                      |
| Model 1      | 0.999(0.892-1.118) | 0.486(0.276-0.856)  | 0.921(0.812-1.044)   |
| Model 2      | 1.052(0.939-1.178) | 0.528(0.273-1.020)  | 0.966(0.849-1.098)   |
| Model 3      | 1.058(0.937-1.195) | 0.525(0.279-0.989)  | 0.960(0.835-1.103)   |
| Total femur  |                    |                     |                      |
| Model 1      | 0.948(0.821-1.095) | 0.683(0.323-1.444)  | 0.804(0.673-0.959)   |
| Model 2      | 0.985(0.851-1.140) | 0.756(0.348-1.640)  | 0.820(0.686-0.981)   |
| Model 3      | 1.009(0.855-1.190) | 0.758(0.338-1.703)  | 0.779(0.641-0.946)   |
| Femoral neck |                    |                     |                      |
| Model 1      | 0.874(0.727-1.050) | 0.878(0.412-1.868)  | 0.760(0.608-0.950)   |
| Model 2      | 0.914(0.761-1.099) | 0.970(0.432-2.180)  | 0.783(0.623-0.984)   |
| Model 3      | 0.919(0.747-1.130) | 0.953(0.400-2.272)  | 0.746(0.576-0.966)   |

Model 1 is adjusted for age and body mass index.

Model 2 is adjusted for age, body mass index, smoking status, alcohol intake, regular exercise, educational level, and income.

Model 3 is adjusted for age, body mass index, smoking status, alcohol intake, regular exercise, educational level, income, 25-hydroxyvitamin D, stress level, and tinnitus.

**TABLE 4. MULTIVARIABLE LOGISTIC REGRESSION ANALYSIS IN BONE MINERAL DENSITY**

|              | Men     |        |         | Premenopausal women |        |         | Postmenopausal women |        |         |
|--------------|---------|--------|---------|---------------------|--------|---------|----------------------|--------|---------|
|              | Beta    | SE     | p-value | Beta                | SE     | p-value | Beta                 | SE     | p-value |
| Lumbar spine |         |        |         |                     |        |         |                      |        |         |
| Model 1      | -0.2899 | 0.2570 | 0.2604  | -0.1820             | 0.1338 | 0.1753  | -0.0778              | 0.1560 | 0.6186  |
| Model 2      | -0.0194 | 0.2472 | 0.9375  | -0.1244             | 0.1320 | 0.3471  | 0.1261               | 0.1449 | 0.3847  |
| Model 3      | 0.0777  | 0.2517 | 0.7578  | -0.1400             | 0.1365 | 0.3063  | 0.1055               | 0.1482 | 0.4772  |
| Total femur  |         |        |         |                     |        |         |                      |        |         |
| Model 1      | -1.1271 | 0.3862 | 0.0038  | 0.0260              | 0.1426 | 0.8553  | -0.2160              | 0.1653 | 0.1924  |
| Model 2      | -1.0141 | 0.3913 | 0.0101  | 0.0034              | 0.1454 | 0.8118  | -0.0549              | 0.1586 | 0.7296  |
| Model 3      | -0.8842 | 0.3892 | 0.0240  | 0.0266              | 0.1511 | 0.8609  | -0.0038              | 0.1690 | 0.8201  |
| Femoral neck |         |        |         |                     |        |         |                      |        |         |
| Model 1      | -0.8639 | 0.4739 | 0.0695  | 0.1211              | 0.1328 | 0.3625  | -0.0713              | 0.1646 | 0.6650  |
| Model 2      | -0.6742 | 0.4917 | 0.1716  | 0.1004              | 0.1335 | 0.4528  | 0.0031               | 0.1565 | 0.8409  |
| Model 3      | -0.5278 | 0.4737 | 0.2663  | 0.0847              | 0.1392 | 0.5433  | -0.0006              | 0.1648 | 0.9969  |

Model 1 is adjusted for age and body mass index.

Model 2 is adjusted for age, body mass index, smoking status, alcohol intake, regular exercise, educational level, and income.

Model 3 is adjusted for age, body mass index, smoking status, alcohol intake, regular exercise, educational level, income, 25-hydroxyvitamin D, stress level, and tinnitus.

Results were represented as a estimated beta with corresponding standard error ( SE) and p-value



**Figure legend**

**Figure 1.** Mean values of hearing level according to bone mineral density for premenopausal (A) postmenopausal (B) women and men(C). After categorizing subjects into four groups based on BMD (quartile 1, with the highest, to quartile 4, with the lowest) in the lumbar spine, total femur, and femur neck, we found a tendency toward significantly decreased hearing as a function of quartile decreases in BMD among postmenopausal women.

\*  $P < 0.05$  was considered to be statistically significant.

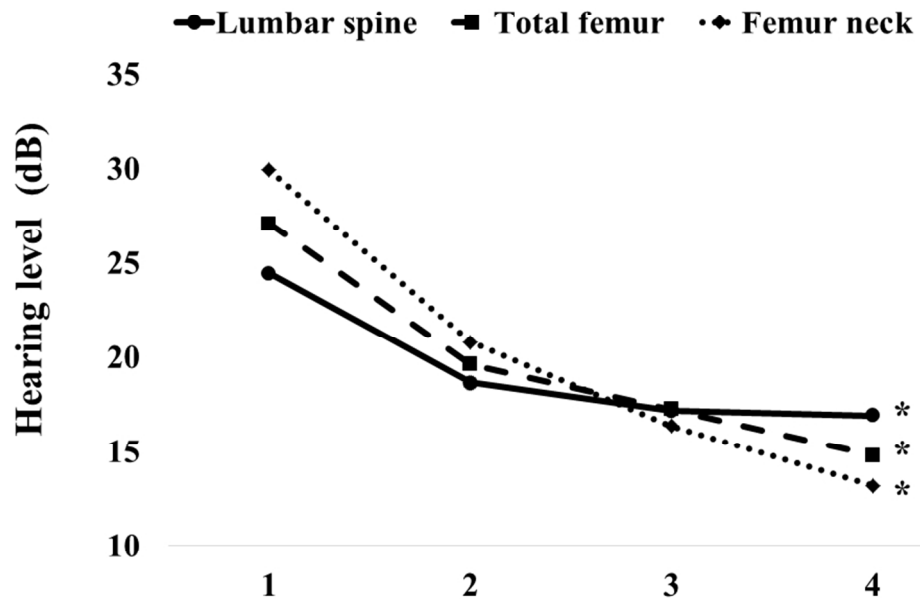

Mean values of hearing level according to bone mineral density for premenopausal women. After categorizing subjects into four groups based on BMD (quartile 1, with the highest, to quartile 4, with the lowest) in the lumbar spine, total femur, and femur neck, we found a tendency toward significantly decreased hearing as a function of quartile decreases in BMD among postmenopausal women.

\*  $P < 0.05$  was considered to be statistically significant.

254x190mm (96 x 96 DPI)

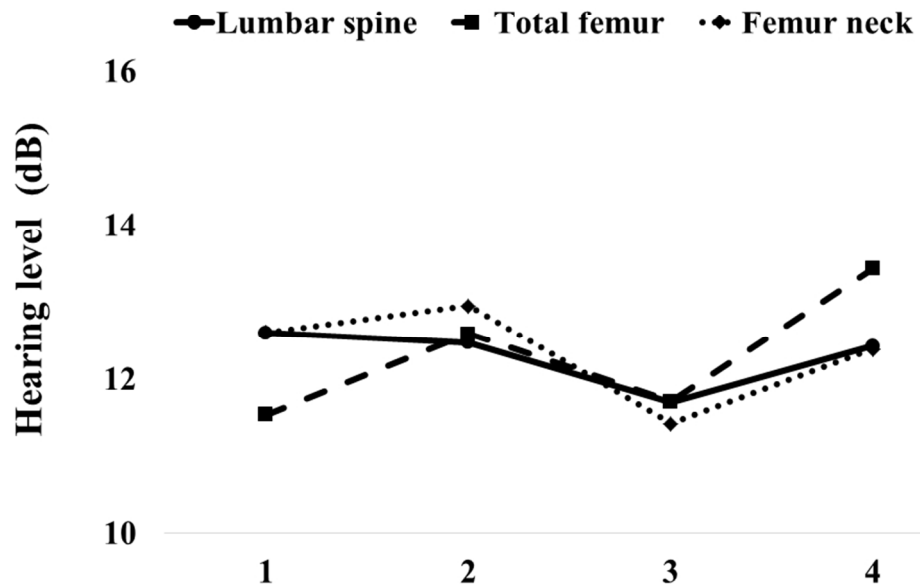

Mean values of hearing level according to bone mineral density for postmenopausal women. After categorizing subjects into four groups based on BMD (quartile 1, with the highest, to quartile 4, with the lowest) in the lumbar spine, total femur, and femur neck, we found a tendency toward significantly decreased hearing as a function of quartile decreases in BMD among postmenopausal women.

\*  $P < 0.05$  was considered to be statistically significant.

254x190mm (96 x 96 DPI)

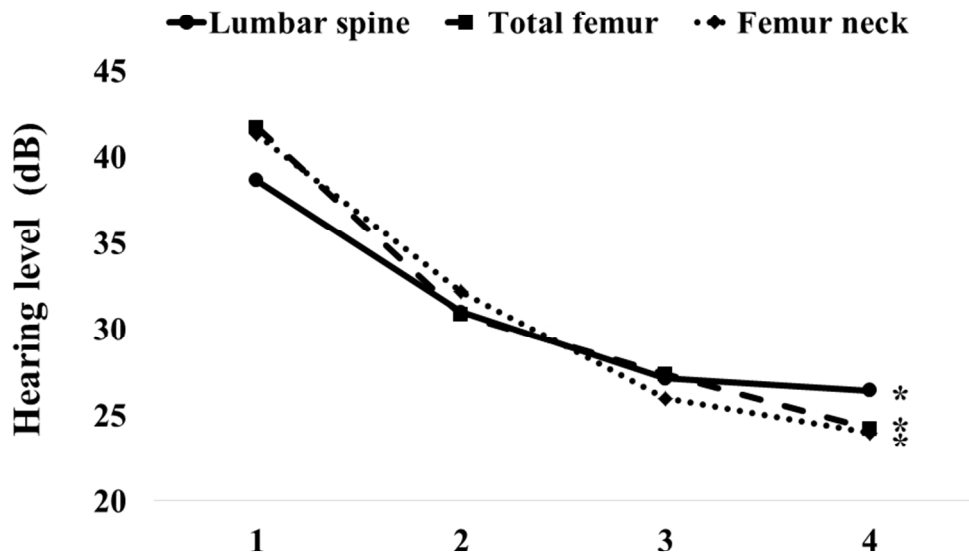

Mean values of hearing level according to bone mineral density for men. After categorizing subjects into four groups based on BMD (quartile 1, with the highest, to quartile 4, with the lowest) in the lumbar spine, total femur, and femur neck, we found a tendency toward significantly decreased hearing as a function of quartile decreases in BMD among postmenopausal women.

\* P < 0.05 was considered to be statistically significant.

254x190mm (96 x 96 DPI)

only

STROBE Statement—checklist of items that should be included in reports of observational studies

|                           | Item No. | Recommendation                                                                                                                                                                                                                                                                                                                                                                                                                                            | Page No.       | Relevant text from manuscript                                                                                                     |
|---------------------------|----------|-----------------------------------------------------------------------------------------------------------------------------------------------------------------------------------------------------------------------------------------------------------------------------------------------------------------------------------------------------------------------------------------------------------------------------------------------------------|----------------|-----------------------------------------------------------------------------------------------------------------------------------|
| <b>Title and abstract</b> | 1        | (a) Indicate the study’s design with a commonly used term in the title or the abstract                                                                                                                                                                                                                                                                                                                                                                    | Page 1 (title) | The Korea National Health and Nutrition Examination Survey                                                                        |
|                           |          | (b) Provide in the abstract an informative and balanced summary of what was done and what was found                                                                                                                                                                                                                                                                                                                                                       | Page 2         | Abstract                                                                                                                          |
| <b>Introduction</b>       |          |                                                                                                                                                                                                                                                                                                                                                                                                                                                           |                |                                                                                                                                   |
| Background/rationale      | 2        | Explain the scientific background and rationale for the investigation being reported                                                                                                                                                                                                                                                                                                                                                                      | Page 3         | Several studies have evaluated the association between BMD and hearing sensitivity.                                               |
| Objectives                | 3        | State specific objectives, including any prespecified hypotheses                                                                                                                                                                                                                                                                                                                                                                                          | Page 4         | We sought to evaluate the relationship between BMD and hearing impairment in a nationally representative sample of Korean adults. |
| <b>Methods</b>            |          |                                                                                                                                                                                                                                                                                                                                                                                                                                                           |                |                                                                                                                                   |
| Study design              | 4        | Present key elements of study design early in the paper                                                                                                                                                                                                                                                                                                                                                                                                   | Page 5         | KNHANES is a nationwide survey designed to assess national health and nutrition levels accurately                                 |
| Setting                   | 5        | Describe the setting, locations, and relevant dates, including periods of recruitment, exposure, follow-up, and data collection                                                                                                                                                                                                                                                                                                                           | Page 5         | This study was based on data collected during the 2010–2012 KNHANES (Korea Centers for Disease Control and Prevention)            |
| Participants              | 6        | (a) <i>Cohort study</i> —Give the eligibility criteria, and the sources and methods of selection of participants. Describe methods of follow-up<br><i>Case-control study</i> —Give the eligibility criteria, and the sources and methods of case ascertainment and control selection. Give the rationale for the choice of cases and controls<br><i>Cross-sectional study</i> —Give the eligibility criteria, and the sources and methods of selection of | Page 5         | The sample included 12,499 participants aged over 19 years.                                                                       |

|                           |    |                                                                                                                                                                                      |                  |                                                                                                                                                                                                                                                                 |
|---------------------------|----|--------------------------------------------------------------------------------------------------------------------------------------------------------------------------------------|------------------|-----------------------------------------------------------------------------------------------------------------------------------------------------------------------------------------------------------------------------------------------------------------|
|                           |    | participants                                                                                                                                                                         |                  |                                                                                                                                                                                                                                                                 |
|                           |    | (b) <i>Cohort study</i> —For matched studies, give matching criteria and number of exposed and unexposed                                                                             |                  |                                                                                                                                                                                                                                                                 |
|                           |    | <i>Case-control study</i> —For matched studies, give matching criteria and the number of controls per case                                                                           |                  |                                                                                                                                                                                                                                                                 |
| Variables                 | 7  | Clearly define all outcomes, exposures, predictors, potential confounders, and effect modifiers. Give diagnostic criteria, if applicable                                             | Page 5, 6, and 7 | tinnitus, Smoking history, alcohol absorption, Regular exercise, Weight and height, Body mass index (BMI), Waist circumference (WC), and Metabolic syndrome                                                                                                     |
| Data sources/ measurement | 8* | For each variable of interest, give sources of data and details of methods of assessment (measurement). Describe comparability of assessment methods if there is more than one group | Page 5           | The survey consists of a health interview, a nutritional survey, and a health examination survey. The survey amasses data via household interviews and by direct standardized physical examinations conducted in specially equipped mobile examination centers. |
| Bias                      | 9  | Describe any efforts to address potential sources of bias                                                                                                                            | Page 8           | We first adjusted for age (model 1), adjusted for age, BMI, smoking status, alcohol intake, and regular exercise (model 2), and adjusted for age, BMI, smoking status, alcohol intake, regular exercise, metabolic syndrome, stress, and tinnitus (model 3).    |
| Study size                | 10 | Explain how the study size was arrived at                                                                                                                                            | Page 5           | This study was based on data collected during the 2010–2012                                                                                                                                                                                                     |

1  
2  
3  
4  
5  
6  
7  
8  
9  
10  
11  
12  
13  
14  
15  
16  
17  
18  
19  
20  
21  
22  
23  
24  
25  
26  
27  
28  
29  
30  
31  
32  
33  
34  
35  
36  
37  
38  
39  
40  
41  
42  
43  
44  
45  
46  
47

---

KNHANES (Korea Centers for  
Disease Control and  
Prevention).

---

Continued on next page

For peer review only

|    |                        |    |                                                                                                                              |                  |                                                                                                                                                                                                                                                                                                                                                                                                                                                                                                                                                                    |
|----|------------------------|----|------------------------------------------------------------------------------------------------------------------------------|------------------|--------------------------------------------------------------------------------------------------------------------------------------------------------------------------------------------------------------------------------------------------------------------------------------------------------------------------------------------------------------------------------------------------------------------------------------------------------------------------------------------------------------------------------------------------------------------|
| 1  |                        |    |                                                                                                                              |                  |                                                                                                                                                                                                                                                                                                                                                                                                                                                                                                                                                                    |
| 2  |                        |    |                                                                                                                              |                  |                                                                                                                                                                                                                                                                                                                                                                                                                                                                                                                                                                    |
| 3  |                        |    |                                                                                                                              |                  |                                                                                                                                                                                                                                                                                                                                                                                                                                                                                                                                                                    |
| 4  | Quantitative variables | 11 | Explain how quantitative variables were handled in the analyses. If applicable, describe which groupings were chosen and why | Page 5, 6, and 7 | The BMD values of the lumbar spine (L1–L4), femoral neck, and total femur were measured using dual-energy X-ray absorptiometry (DXA) using a Discovery fan-beam densitometer (Hologic, Bedford, MA, USA) and the Hologic Discovery software (ver. 3.1). Smoking history was categorized into the three groups: current smoker, ex-smoker and non-smoker. Subjects who drank more than 30 g/day were designated as heavy drinkers. Regular exercise was defined as strenuous physical activity performed for at least 20 min at a time at least three times a week. |
| 5  |                        |    |                                                                                                                              |                  |                                                                                                                                                                                                                                                                                                                                                                                                                                                                                                                                                                    |
| 6  |                        |    |                                                                                                                              |                  |                                                                                                                                                                                                                                                                                                                                                                                                                                                                                                                                                                    |
| 7  |                        |    |                                                                                                                              |                  |                                                                                                                                                                                                                                                                                                                                                                                                                                                                                                                                                                    |
| 8  |                        |    |                                                                                                                              |                  |                                                                                                                                                                                                                                                                                                                                                                                                                                                                                                                                                                    |
| 9  |                        |    |                                                                                                                              |                  |                                                                                                                                                                                                                                                                                                                                                                                                                                                                                                                                                                    |
| 10 |                        |    |                                                                                                                              |                  |                                                                                                                                                                                                                                                                                                                                                                                                                                                                                                                                                                    |
| 11 |                        |    |                                                                                                                              |                  |                                                                                                                                                                                                                                                                                                                                                                                                                                                                                                                                                                    |
| 12 |                        |    |                                                                                                                              |                  |                                                                                                                                                                                                                                                                                                                                                                                                                                                                                                                                                                    |
| 13 |                        |    |                                                                                                                              |                  |                                                                                                                                                                                                                                                                                                                                                                                                                                                                                                                                                                    |
| 14 |                        |    |                                                                                                                              |                  |                                                                                                                                                                                                                                                                                                                                                                                                                                                                                                                                                                    |
| 15 |                        |    |                                                                                                                              |                  |                                                                                                                                                                                                                                                                                                                                                                                                                                                                                                                                                                    |
| 16 |                        |    |                                                                                                                              |                  |                                                                                                                                                                                                                                                                                                                                                                                                                                                                                                                                                                    |
| 17 |                        |    |                                                                                                                              |                  |                                                                                                                                                                                                                                                                                                                                                                                                                                                                                                                                                                    |
| 18 |                        |    |                                                                                                                              |                  |                                                                                                                                                                                                                                                                                                                                                                                                                                                                                                                                                                    |
| 19 |                        |    |                                                                                                                              |                  |                                                                                                                                                                                                                                                                                                                                                                                                                                                                                                                                                                    |
| 20 |                        |    |                                                                                                                              |                  |                                                                                                                                                                                                                                                                                                                                                                                                                                                                                                                                                                    |
| 21 |                        |    |                                                                                                                              |                  |                                                                                                                                                                                                                                                                                                                                                                                                                                                                                                                                                                    |
| 22 |                        |    |                                                                                                                              |                  |                                                                                                                                                                                                                                                                                                                                                                                                                                                                                                                                                                    |
| 23 |                        |    |                                                                                                                              |                  |                                                                                                                                                                                                                                                                                                                                                                                                                                                                                                                                                                    |
| 24 |                        |    |                                                                                                                              |                  |                                                                                                                                                                                                                                                                                                                                                                                                                                                                                                                                                                    |
| 25 | Statistical methods    | 12 | (a) Describe all statistical methods, including those used to control for confounding                                        | Page 6 and 7     | The prevalence and 95% confidence intervals (CIs) for dizziness were calculated. In the univariate analysis, the Rao-Scott chi-square test (using PROC SURVEYFREQ in SAS) and logistic regression analysis (using PROC SURVEYLOGISTIC in SAS) were used to test the association between gender and risk factors in a complex sampling design. Participants' characteristics were described using means and standard errors for continuous                                                                                                                          |
| 26 |                        |    |                                                                                                                              |                  |                                                                                                                                                                                                                                                                                                                                                                                                                                                                                                                                                                    |
| 27 |                        |    |                                                                                                                              |                  |                                                                                                                                                                                                                                                                                                                                                                                                                                                                                                                                                                    |
| 28 |                        |    |                                                                                                                              |                  |                                                                                                                                                                                                                                                                                                                                                                                                                                                                                                                                                                    |
| 29 |                        |    |                                                                                                                              |                  |                                                                                                                                                                                                                                                                                                                                                                                                                                                                                                                                                                    |
| 30 |                        |    |                                                                                                                              |                  |                                                                                                                                                                                                                                                                                                                                                                                                                                                                                                                                                                    |
| 31 |                        |    |                                                                                                                              |                  |                                                                                                                                                                                                                                                                                                                                                                                                                                                                                                                                                                    |
| 32 |                        |    |                                                                                                                              |                  |                                                                                                                                                                                                                                                                                                                                                                                                                                                                                                                                                                    |
| 33 |                        |    |                                                                                                                              |                  |                                                                                                                                                                                                                                                                                                                                                                                                                                                                                                                                                                    |
| 34 |                        |    |                                                                                                                              |                  |                                                                                                                                                                                                                                                                                                                                                                                                                                                                                                                                                                    |
| 35 |                        |    |                                                                                                                              |                  |                                                                                                                                                                                                                                                                                                                                                                                                                                                                                                                                                                    |
| 36 |                        |    |                                                                                                                              |                  |                                                                                                                                                                                                                                                                                                                                                                                                                                                                                                                                                                    |
| 37 |                        |    |                                                                                                                              |                  |                                                                                                                                                                                                                                                                                                                                                                                                                                                                                                                                                                    |
| 38 |                        |    |                                                                                                                              |                  |                                                                                                                                                                                                                                                                                                                                                                                                                                                                                                                                                                    |
| 39 |                        |    |                                                                                                                              |                  |                                                                                                                                                                                                                                                                                                                                                                                                                                                                                                                                                                    |
| 40 |                        |    |                                                                                                                              |                  |                                                                                                                                                                                                                                                                                                                                                                                                                                                                                                                                                                    |
| 41 |                        |    |                                                                                                                              |                  |                                                                                                                                                                                                                                                                                                                                                                                                                                                                                                                                                                    |



1  
2  
3  
4  
5  
6  
7  
8  
9  
10  
11  
12  
13  
14  
15  
16  
17  
18  
19  
20  
21  
22  
23  
24  
25  
26  
27  
28  
29  
30  
31  
32  
33  
34  
35  
36  
37  
38  
39  
40  
41  
42  
43  
44  
45  
46  
47

variables and numbers and percentages for categorical variables. A final logistic regression model was used to examine the association between sleep duration and dizziness.

|                                                                                                                                                                                                                                                                                                           |              |                                                                                                                                                                                                                                                                                                                                                                                                                        |
|-----------------------------------------------------------------------------------------------------------------------------------------------------------------------------------------------------------------------------------------------------------------------------------------------------------|--------------|------------------------------------------------------------------------------------------------------------------------------------------------------------------------------------------------------------------------------------------------------------------------------------------------------------------------------------------------------------------------------------------------------------------------|
| (b) Describe any methods used to examine subgroups and interactions                                                                                                                                                                                                                                       | Page 6 and 7 | Same as the above.                                                                                                                                                                                                                                                                                                                                                                                                     |
| (c) Explain how missing data were addressed                                                                                                                                                                                                                                                               | Page 6 and 7 | Statistical analyses were performed using the SAS survey procedure (ver. 9.3; SAS Institute, Cary, NC, USA) to reflect the complex sampling design and sampling weights of KNHANES and to provide nationally representative prevalence estimates. The procedures included unequal probabilities of selection, oversampling, and nonresponse so that inferences could be made about the Korean adolescent participants. |
| (d) <i>Cohort study</i> —If applicable, explain how loss to follow-up was addressed<br><i>Case-control study</i> —If applicable, explain how matching of cases and controls was addressed<br><i>Cross-sectional study</i> —If applicable, describe analytical methods taking account of sampling strategy |              |                                                                                                                                                                                                                                                                                                                                                                                                                        |
| (e) Describe any sensitivity analyses                                                                                                                                                                                                                                                                     |              |                                                                                                                                                                                                                                                                                                                                                                                                                        |

**Results**

|              |     |                                                                                                                                                                                                   |        |                                                                                                                                                                    |
|--------------|-----|---------------------------------------------------------------------------------------------------------------------------------------------------------------------------------------------------|--------|--------------------------------------------------------------------------------------------------------------------------------------------------------------------|
| Participants | 13* | (a) Report numbers of individuals at each stage of study—eg numbers potentially eligible, examined for eligibility, confirmed eligible, included in the study, completing follow-up, and analysed | Page 9 | There were 12,499 respondents in our study, comprising 5406 (43.25%) males and 7093 (56.75%) females, and 2690 had experienced dizziness or imbalance in the prior |
|--------------|-----|---------------------------------------------------------------------------------------------------------------------------------------------------------------------------------------------------|--------|--------------------------------------------------------------------------------------------------------------------------------------------------------------------|

|                  |     |                                                                                                                                                                                                              |        |                                                                                                                                                                                                                                                                                                                                              |
|------------------|-----|--------------------------------------------------------------------------------------------------------------------------------------------------------------------------------------------------------------|--------|----------------------------------------------------------------------------------------------------------------------------------------------------------------------------------------------------------------------------------------------------------------------------------------------------------------------------------------------|
|                  |     |                                                                                                                                                                                                              |        | 12 months.                                                                                                                                                                                                                                                                                                                                   |
|                  |     | (b) Give reasons for non-participation at each stage                                                                                                                                                         | Page 9 | Same as the above.                                                                                                                                                                                                                                                                                                                           |
|                  |     | (c) Consider use of a flow diagram                                                                                                                                                                           |        |                                                                                                                                                                                                                                                                                                                                              |
| Descriptive data | 14* | (a) Give characteristics of study participants (eg demographic, clinical, social) and information on exposures and potential confounders                                                                     | Page 9 | The baseline characteristics of the study subjects according to gender are shown in Table 1.                                                                                                                                                                                                                                                 |
|                  |     | (b) Indicate number of participants with missing data for each variable of interest                                                                                                                          | Page 9 | There were 12,499 respondents in our study, comprising 5406 (43.25%) males and 7093 (56.75%) females, and 2690 had experienced dizziness or imbalance in the prior 12 months.                                                                                                                                                                |
|                  |     | (c) <i>Cohort study</i> —Summarise follow-up time (eg, average and total amount)                                                                                                                             |        |                                                                                                                                                                                                                                                                                                                                              |
| Outcome data     | 15* | <i>Cohort study</i> —Report numbers of outcome events or summary measures over time                                                                                                                          |        |                                                                                                                                                                                                                                                                                                                                              |
|                  |     | <i>Case-control study</i> —Report numbers in each exposure category, or summary measures of exposure                                                                                                         |        |                                                                                                                                                                                                                                                                                                                                              |
|                  |     | <i>Cross-sectional study</i> —Report numbers of outcome events or summary measures                                                                                                                           | Page 9 | There were 12,499 respondents in our study, comprising 5406 (43.25%) males and 7093 (56.75%) females, and 2690 had experienced dizziness or imbalance in the prior 12 months.                                                                                                                                                                |
| Main results     | 16  | (a) Give unadjusted estimates and, if applicable, confounder-adjusted estimates and their precision (eg, 95% confidence interval). Make clear which confounders were adjusted for and why they were included | Page 9 | The adjusted OR for sleep duration is not significant in dizziness for men. Meanwhile, the risk of dizziness was significantly associated with sleep duration in only women. Compared to participants with optimal sleep duration (six to eight hours), those with severe short sleep duration ( $\leq 5$ hours) (OR [95% CI]: 1.566 [1.289- |

1  
2  
3  
4  
5  
6  
7  
8  
9  
10  
11  
12  
13  
14  
15  
16  
17  
18  
19  
20  
21  
22  
23  
24  
25  
26  
27  
28  
29  
30  
31  
32  
33  
34  
35  
36  
37  
38  
39  
40  
41  
42  
43  
44  
45  
46  
47

For peer review only

1.903] in model 1, OR [95% CI]: 1.557 [1.276-1.898] in model 2, and OR [95% CI]: 1.473 [1.194-1.818] in model 3) and severe long sleep duration ( $\geq 9$  hours) (OR [95% CI]: 1.420 [1.042-1.936] in model 1, OR [95% CI]: 1.418 [1.040-1.934] in model 2, and OR [95% CI]: 1.472 [1.078-2.009] in model 3) had an increased dizziness risk after adjusting for the confounders.

|                                                                                  |        |                                                                                                                                                                           |
|----------------------------------------------------------------------------------|--------|---------------------------------------------------------------------------------------------------------------------------------------------------------------------------|
| <i>(b)</i> Report category boundaries when continuous variables were categorized | Page 9 | Among variables regarding health behavior patterns, current smoker, heavy drinker, routine exercise, job, and waist circumference were significantly associated with men. |
|----------------------------------------------------------------------------------|--------|---------------------------------------------------------------------------------------------------------------------------------------------------------------------------|

*(c)* If relevant, consider translating estimates of relative risk into absolute risk for a meaningful time period

Continued on next page

1  
2  
3  
4  
5  
6  
7  
8  
9  
10  
11  
12  
13  
14  
15  
16  
17  
18  
19  
20  
21  
22  
23  
24  
25  
26  
27  
28  
29  
30  
31  
32  
33  
34  
35  
36  
37  
38  
39  
40  
41  
42  
43  
44  
45  
46  
47

|                   |    |                                                                                                                                                            |         |                                                                                                                                                                                                                                                                                                                                                                                                                                                                                                                                                                                                                                                                                                                                                                                                                                                                          |
|-------------------|----|------------------------------------------------------------------------------------------------------------------------------------------------------------|---------|--------------------------------------------------------------------------------------------------------------------------------------------------------------------------------------------------------------------------------------------------------------------------------------------------------------------------------------------------------------------------------------------------------------------------------------------------------------------------------------------------------------------------------------------------------------------------------------------------------------------------------------------------------------------------------------------------------------------------------------------------------------------------------------------------------------------------------------------------------------------------|
| Other analyses    | 17 | Report other analyses done—eg analyses of subgroups and interactions, and sensitivity analyses                                                             |         |                                                                                                                                                                                                                                                                                                                                                                                                                                                                                                                                                                                                                                                                                                                                                                                                                                                                          |
| <b>Discussion</b> |    |                                                                                                                                                            |         |                                                                                                                                                                                                                                                                                                                                                                                                                                                                                                                                                                                                                                                                                                                                                                                                                                                                          |
| Key results       | 18 | Summarise key results with reference to study objectives                                                                                                   | Page 10 | abnormal sleep duration such as short or long duration are associated with dizziness in women                                                                                                                                                                                                                                                                                                                                                                                                                                                                                                                                                                                                                                                                                                                                                                            |
| Limitations       | 19 | Discuss limitations of the study, taking into account sources of potential bias or imprecision. Discuss both direction and magnitude of any potential bias | Page 12 | By contrast, this study also had several limitations. First, sleep duration and dizziness were reported only by respondents and were not recorded or observed directly. This may bias our results, as there is only modest correlation between reported and recorded sleep. Although there were some researches with objective sleep data, those measures are not practical for large, nationally representative samples. Furthermore, self-reported sleep duration has been used widely in epidemiological studies examining the relationship between sleep duration and morbidity and mortality. Secondly, our data consider only abnormal duration of sleep. Additional sleep problems, such as snoring, apnea and daytime sleepiness, should be investigated in future studies. Third, the related variables of which the presence or absence may be associated with |

1  
2  
3  
4  
5  
6  
7  
8  
9  
10  
11  
12  
13  
14  
15  
16  
17  
18  
19  
20  
21  
22  
23  
24  
25  
26  
27  
28  
29  
30  
31  
32  
33  
34  
35  
36  
37  
38  
39  
40  
41  
42  
43  
44  
45  
46  
47

|                          |    |                                                                                                                                                                            |         |                                                                                                                                                                                                                |
|--------------------------|----|----------------------------------------------------------------------------------------------------------------------------------------------------------------------------|---------|----------------------------------------------------------------------------------------------------------------------------------------------------------------------------------------------------------------|
|                          |    |                                                                                                                                                                            |         | vestibular dysfunction and could affect the results were not able to be evaluated and the participants with other acute disease status, such as BPPV, were not able to be excluded from this study.            |
| Interpretation           | 20 | Give a cautious overall interpretation of results considering objectives, limitations, multiplicity of analyses, results from similar studies, and other relevant evidence | Page 12 | Same as the above.                                                                                                                                                                                             |
| Generalisability         | 21 | Discuss the generalisability (external validity) of the study results                                                                                                      | Page 13 | KNHANES is a nationwide cross-sectional study to select a representative sample of the Korean population. This survey employed stratified multi-stage design based on age, sex, and residence geographic area. |
| <b>Other information</b> |    |                                                                                                                                                                            |         |                                                                                                                                                                                                                |
| Funding                  | 22 | Give the source of funding and the role of the funders for the present study and, if applicable, for the original study on which the present article is based              |         | No funding source                                                                                                                                                                                              |

\*Give information separately for cases and controls in case-control studies and, if applicable, for exposed and unexposed groups in cohort and cross-sectional studies.

**Note:** An Explanation and Elaboration article discusses each checklist item and gives methodological background and published examples of transparent reporting. The STROBE checklist is best used in conjunction with this article (freely available on the Web sites of PLoS Medicine at <http://www.plosmedicine.org/>, Annals of Internal Medicine at <http://www.annals.org/>, and Epidemiology at <http://www.epidem.com/>). Information on the STROBE Initiative is available at [www.strobe-statement.org](http://www.strobe-statement.org).

# BMJ Open

## Association between Low Bone Mineral Density and Hearing Impairment in Postmenopausal Women: the Korean National Health and Nutrition Examination Survey

|                                 |                                                                                                                                                                                                                                      |
|---------------------------------|--------------------------------------------------------------------------------------------------------------------------------------------------------------------------------------------------------------------------------------|
| Journal:                        | <i>BMJ Open</i>                                                                                                                                                                                                                      |
| Manuscript ID                   | bmjopen-2017-018763.R1                                                                                                                                                                                                               |
| Article Type:                   | Research                                                                                                                                                                                                                             |
| Date Submitted by the Author:   | 01-Nov-2017                                                                                                                                                                                                                          |
| Complete List of Authors:       | Lee, Seong-Su; Seoul Natl Univ Han, Kyungdo; Catholic University of Korea School of Medicine, Department of Biostatistics<br>Joo, Young-Hoon; The Catholic University of Korea, Department of Otolaryngology, Head and Neck Surgery, |
| <b>Primary Subject Heading</b>: | Diabetes and endocrinology                                                                                                                                                                                                           |
| Secondary Subject Heading:      | Ear, nose and throat/otolaryngology                                                                                                                                                                                                  |
| Keywords:                       | hearing impairment, bone mineral density, Epidemiology < TROPICAL MEDICINE                                                                                                                                                           |
|                                 |                                                                                                                                                                                                                                      |

SCHOLARONE™  
Manuscripts

1  
2  
3  
4 **Association between Low Bone Mineral Density and Hearing Impairment**  
5  
6 **in Postmenopausal Women: the Korean National Health and Nutrition**  
7 **Examination Survey**  
8  
9

10  
11  
12  
13 **Seong-Su Lee, MD, PhD,<sup>1</sup> Kyung-do Han, MPH,<sup>2</sup> and Young-Hoon Joo MD, PhD<sup>3</sup>**  
14  
15

16  
17  
18 <sup>1</sup>Division of Endocrinology and Metabolism, Department of Internal Medicine, <sup>2</sup>Department  
19 of Biostatistics, <sup>3</sup>Department of Otolaryngology-Head and Neck Surgery, College of  
20 Medicine, The Catholic University of Korea, Seoul, Korea  
21  
22  
23  
24  
25

26 Running title: Bone Mineral Density and Hearing Status  
27  
28  
29

30  
31 \*Corresponding author: Young-Hoon Joo, MD  
32

33 Department of Otolaryngology, Head and Neck Surgery,  
34

35 Bucheon St. Mary's Hospital, College of Medicine,  
36

37 The Catholic University of Korea  
38

39 2 Sosa-dong, Wonmi-gu, Bucheon,  
40

41 Kyonggi-do 420-717, Republic of Korea  
42

43  
44 Tel: +82 32 340 7090, Fax: +82 32 340 2674, E-mail: [joodoct@catholic.ac.kr](mailto:joodoct@catholic.ac.kr)  
45  
46  
47

48 Financial disclosure : none  
49

50  
51 Conflict of interest : none  
52  
53  
54  
55  
56  
57  
58  
59  
60

## Abstract

**Objective :** We investigated the relationship between bone mineral density (BMD) and hearing impairment in a nationally demonstrative sample of Korean female adults.

**Study Design :** Cross-sectional study of a national health survey.

**Methods :** We studied information from the 2009–2010 Korean National Health and Nutrition Examination Surveys (KNHANES), which involved 19,491 participants, 8,773 of whom were enrolled in this study. BMD was measured using dual-energy X-ray absorptiometry. Auditory functioning was evaluated by pure-tone audiometric testing according to established KNHANES protocols. We deliberated auditory impairment as pure-tone averages (PTA) at frequencies of 0.5, 1.0, 2.0, and 3.0 kHz at a threshold of  $\geq 40$  decibels hearing level (dBHL) in the auricle with better audible status.

**Results:** Among women aged 19 years and older, the prevalences of bilateral hearing impairment in premenopausal and postmenopausal women were  $0.1 \pm 0.1\%$  and  $11.5 \pm 1.1\%$  (mean  $\pm$  SE), respectively. Hearing impairment was meaningfully associated with low BMD in postmenopausal women. Logistic regression models indicated that lower BMD of the total femur (OR = 0.779; 95% CI = 0.641–0.946,  $p = 0.0118$ ) and femur neck (OR = 0.746; 95% CI = 0.576–0.966,  $p = 0.0265$ ) were significantly associated with hearing impairment among postmenopausal women.

**Conclusions:** Postmenopausal Korean women with low BMD of the total femur and femoral neck showed an increased risk for developing hearing impairment. Further epidemiological and investigational studies are necessary to elucidate this association.

**Key words:** hearing impairment, bone mineral density, epidemiology



### **Strengths and limitations of this study**

- We used a nation widely demonstrative, cross-sectional, civilian non-institutionalized sample of Korean adults.

- We evaluated the relationships between BMD and hearing level including various social, economic, behavioral, and health variables on the population-based database

- We were incapable of analyzing the temporal association between hearing impairment and BMD, which may make our results biased.

## Introduction

Osteoporosis has become a mainly healthcare problem around the world.<sup>1</sup> Osteoporosis prevalence at the total hip or hip/spine ranged from 9 to 38 % for female and 1 to 8 % for male in nine industrialized nations in North America, Europe, Japan, and Australia.<sup>2</sup> It has been stated that crucial demographic alterations will occur in Asia.<sup>3</sup> Thus, the prevalence and incidence of osteoporosis are expected to increase in this ageing society.<sup>4</sup> Osteoporosis is considered by the worsening of the bone microarchitecture and a reduction in the bone mineral density (BMD).<sup>5</sup> Decreased BMD causes demineralization of the bone system. Deterioration of the petrous temporal bone, which encases the cochlear capsule and internal auditory canal, may be related with impaired audible function.<sup>5-8</sup> Osteoporosis is characteristically accepted as an important health care concern in females, but is now progressively regarded as an significant health care issue in males as well.

Adult-onset hearing impairment is the another most public reason of disability among adults in high-income nations.<sup>9</sup> The total prevalence of audiometric hearing loss among persons with bilateral hearing loss aged 12 years and older in the United States was 12.7% (30.0 million) between 2001 and 2008, and this increased to 20.3% (48.1 million) when individuals with unilateral hearing loss were included.<sup>10</sup> Hearing impairment can isolate individuals from their social environment, impair psychosocial functioning, impair cognitive skills, increase individual emotional stress, and have negative health effects at the individual and family levels.<sup>11</sup> Moreover, it has been recently described that hearing impairment is related with a menace of depression among adults, particularly women.<sup>12</sup>

Several studies have evaluated the suggestion between BMD and audible sensitivity. Clark et al reported that 369 white female aged 60 to 85 years with femoral neck skeletal mass values below the mean value of 0.696 g/cm<sup>2</sup> had a 1.9 greater odds of having a hearing loss.<sup>5</sup> In contrast, Helzner et al. showed no association between hearing and any of the bone

1  
2  
3  
4 measurements in white and black female.<sup>13</sup> There are discrepancies and limitations in  
5  
6 previous studies of associations between BMD and audible impairment, including differences  
7  
8 in race, study design, and measurements of hearing impairment<sup>14</sup>. Thus, we pursued to assess  
9  
10 the relationship between BMD and hearing impairment in a representative example of Korean  
11  
12 adult populations. We hypothesized that auditory impairment was positively correlated with  
13  
14 low BMD in the Korean female or elderly male population. Understanding and identifying  
15  
16 the associations between BMD and hearing impairment in an extensive research would  
17  
18 significantly be helpful for patient management and reduction of social burden for these  
19  
20 conditions.  
21  
22

23 To our knowledge, no nationwide study on hearing impairment, as diagnosed by  
24  
25 otolaryngology doctors, and no study on the relationship between BMD and hearing  
26  
27 impairment in an Asian female have been published. Thus, we investigated association  
28  
29 between BMD and hearing impairment in a large representative population example from the  
30  
31 Korean National Health and Nutrition Examination Surveys (KNHANES).  
32  
33  
34  
35

## 36 **Methods**

### 37 **Study Population**

38  
39 This study was based on data collected in the 2009–2010 KNHANES study conducted by the  
40  
41 Division of Chronic Disease Surveillance, which has been under the supervision of the  
42  
43 Korea's Centers for Disease Control and Prevention since 1998. The KNHANES is a  
44  
45 nationwide survey designed to accurately assess health and nutritional status at the national  
46  
47 level. A field survey team, including an otolaryngologist, an ophthalmologist, and nurses  
48  
49 traveled with a mobile examination unit and performed interviews and physical examinations.  
50  
51 The survey consisted of a health interview, a nutritional survey, and a health examination  
52  
53 survey. The survey collected data via household interviews and by direct standardized  
54  
55  
56  
57  
58  
59  
60

1  
2  
3  
4 physical examinations conducted in specially equipped mobile examination centers. The  
5  
6 KNHANES methodology has been described in detail previously and further details are listed  
7  
8 in “The 5th KNHANES Sample Design” and reports, made accessible on the KNHANES  
9  
10 website <https://knhanes.cdc.go.kr/knhanes/index.do>. The KNHANES annual reports, user  
11  
12 manuals and instructions, and raw data are available on request.<sup>15,16</sup>  
13

14  
15 This study is retrospective cross-sectional analysis of a nationwide health survey. During  
16  
17 2009–2010, there were 19,491 KNHANES participants. Of these, 10,718 were excluded from  
18  
19 the analysis because of at least one of the following reasons: younger than 19 years; did not  
20  
21 undergo the otological, BMD, or 25 hydroxy vitamin D tests; or were missing data from the  
22  
23 lifestyle questionnaire. The final sample included 8,773 adults aged 19 years and men,  
24  
25 premenopausal, and postmenopausal women were 3,885, 2,622, and 2,266, respectively.  
26  
27 Written informed consent was obtained from all participants prior to the survey. Approval for  
28  
29 this study was obtained from the Institutional Review Board of the Catholic University of  
30  
31 Korea, Seoul, Korea. (IRB no. HC14EISE0097; Bucheon, Korea).  
32  
33

### 34 35 36 **Bone Mineral Density and Laboratory Measurements**

37  
38 Participants wore light clothes without shoes and jewelry, which could interfere with the  
39  
40 BMD measurements. BMD was checked by trained technicians at mobile examination  
41  
42 centers. The BMD values of the lumbar spine (L1–L4), femoral neck, and total femur were  
43  
44 measured using dual-energy X-ray absorptiometry (DXA) using a Discovery fan-beam  
45  
46 densitometer (Hologic, Bedford, MA, USA) and the Hologic Discovery software (ver. 3.1).  
47  
48 To guarantee DXA quality control, daily programmed calibration was done according to the  
49  
50 manufacturer’s directions to keep a precision standard of 1.5% for total hip measurements.  
51  
52

53  
54 Standing height was calculated with the subject looking forward, barefoot, feet  
55  
56 together, arms at the sides, and heels, buttocks, and upper back in contact with the wall.  
57  
58

1  
2  
3  
4 Height was measured in centimeters to one decimal point using a calibrated stadiometer  
5 (SECA 225 stadiometer, SECA, Hamburg, Germany). Waist circumference (WC) was  
6 measured at the level of the midpoint between the iliac crest and the costal margin at the end  
7 of a normal expiration to the nearest 0.1 cm. Weight was measured using a mobile scale  
8 (GL-6000-20; Cas Korea, Seoul, Korea) in kilograms to one decimal point. Body mass index  
9 (BMI) was calculated as weight (kg)/height (m<sup>2</sup>). Blood samples for biochemical analyses  
10 and measurement of serum 25-hydroxyvitamin D (25(OH)D) were attained from all subjects,  
11 refrigerated instantly, carried to the Principal Analysis Foundation in Seoul, Korea, and  
12 scrutinized within 24 h.  
13  
14  
15  
16  
17  
18  
19  
20  
21  
22  
23  
24

### 25 **Audiometric Measurements**

26  
27 Pure-tone audiometric test was done by a SA 203 audiometer (Entomed; Malmö, Sweden).  
28 Pure-tone audiometry is a behavioral assessment used to calculate audible sensitivity.  
29  
30 'Audiometric' means 'measuring the hearing level'. Examination was accompanied in a  
31 soundproof booth inside a transportable bus set aside for the KNHANES. Otolaryngologists  
32 skilled to work the audiometer provided directions to subjects regarding the automated  
33 hearing test and attained the records. All audiometric analysis was done under the supervising  
34 by an otolaryngologist. Solely thresholds of air conduction were investigated. Air conduction  
35 assesses the whole ear system -- outer, middle, and inner ear. Threshold means the lowest  
36 decibel hearing level at which responses occur in at least one half of a series of ascending  
37 trials. The minimum number of responses needed to determine the threshold of hearing is two  
38 responses out of three presentations at a single level. Over-Ear headphones were used in the  
39 soundproof booth. Supra-auricular' is defined as 'situated above the ear coverts'. Automated  
40 analysis was platformed according to a modified Hughson–Westlake procedure and involved  
41 the use of a single pure tone of 1–2 s. The lowest level at which the participant answered to  
42  
43  
44  
45  
46  
47  
48  
49  
50  
51  
52  
53  
54  
55  
56  
57  
58  
59  
60

1  
2  
3  
4 50% of the pure tone was established as the threshold. The test–retest reliability and validity  
5  
6 of the automated audible examination relating air-conducted pure-tone provocations was  
7  
8 effective and equivalent of those attained in the manual pure-tone acoustic assessment.<sup>17,18</sup>  
9

10 Subjects answered by touch down a button when they caught a tone, and the outcomes were  
11  
12 documented spontaneously. The frequency ranges tested were 0.5, 1.0, 2.0, 3.0, 4.0, and 6.0  
13  
14 kHz. We described hearing impairment as pure-tone averages (PTA) of frequencies at 0.5,  
15  
16 1.0, 2.0, and 3.0 kHz at a threshold of  $\geq 40$  decibel hearing level (dBHL) in the ear with  
17  
18 better hearing.<sup>19</sup>  
19

20  
21 Participants were requested of their experience of tinnitus: ‘Within the past year, have  
22  
23 you ever heard a sound (buzzing, hissing, ringing, humming, roaring, machinery noise) come  
24  
25 from your ear?’ Investigators were instructed to record ‘yes’ if an applicant stated  
26  
27 perceiving an odd or unusual sound at any time in the past year. Subjects who responded  
28  
29 certainly to this question were then asked of the causing annoyance in their lives using the  
30  
31 following question: ‘How annoying is this sound in daily life?’ (not  
32  
33 annoying/annoying/severely annoying, and causes sleep problems). The participants were  
34  
35 deliberated to have tinnitus if the severity of tinnitus was annoying or severely annoying.  
36  
37  
38  
39

#### 40 **Lifestyle Habits**

41  
42 Data on medical histories and lifestyle habits were collected using self-report questionnaires.  
43  
44 Participants were categorized into three groups according to smoking history: current smoker,  
45  
46 ex-smoker, and nonsmoker. Subjects who drank more than 30 g of ethanol/day were  
47  
48 designated as drinkers. Regular exercise was defined as strenuous physical activity performed  
49  
50 for at least 20 min at a time at least three times per week. Subjects stated their level of stress  
51  
52 as none, mild, moderate, or severe.  
53  
54  
55  
56  
57  
58  
59  
60

## Statistical Analysis

Statistical evaluations were done by the SAS survey procedure (ver. 9.3; SAS Institute, Cary, NC, USA) to reveal the complex sampling design and sampling weights of the KNHANES and to provide nationwide demonstrative prevalence assessments. The prevalence and 95% confidence intervals (CIs) for BMD were planned. In the univariate analysis, the Rao-Scott  $\chi^2$  test (using PROC SURVEYFREQ in SAS) and logistic regression analysis (using PROC SURVEYLOGISTIC in SAS) were used to examine the relationship between hearing impairment and risk factors in a complex sampling design. Subjects' characteristics are expressed as means and standard errors for continuous variables and as percentages for categorical variables. To examine the association of hearing level and BMD, the participants were divided into quartiles based on levels of BMD (Q1–Q4). Simple and multiple linear regression analyses were done to investigate the relationship between hearing impairment and BMD.

We first adjusted for age and BMI (model 1) and then adjusted for the variables in model 1 as well as for smoking status, ethanol intake, exercise, education, and income (model 2). Model 3 was adjusted for the variables in model 2 and for vitamin D, stress, and tinnitus. P-values were two-tailed, and P values < 0.05 were considered statistically significant.

## Results

Of the 4,888 female participants aged  $\geq 19$  years, 2,622 and 2,266 were premenopausal and postmenopausal, respectively. Table 1 shows baseline features of men, premenopausal and postmenopausal women. The mean age of men, premenopausal, and postmenopausal women was  $43.9 \pm 0.3$ ,  $35.3 \pm 0.2$  and  $62.7 \pm 0.3$  years, respectively. The prevalence of bilateral hearing impairment in the postmenopausal women was  $11.5 \pm 1.1\%$  (mean  $\pm$  SE). Postmenopausal

1  
2  
3  
4 women were less possible to drink ethanol, more possible to have a low income, compared  
5  
6 with men and premenopausal women. The mean values of BMI, WC, and the level of vitamin  
7  
8 D were lower among premenopausal females than among postmenopausal females. The  
9  
10 BMDs of the lumbar spine, total femur, and femoral neck were lower in postmenopausal  
11  
12 females than in men premenopausal females. Table 2 shows subject characteristics according  
13  
14 to bilateral hearing impairment.  
15

16  
17 After categorizing subjects into four groups based on the percentage of BMD (quartile 1,  
18  
19 with the highest, to quartile 4, with the lowest), we used analysis of covariance (ANCOVA)  
20  
21 to investigate hearing level according to BMD quartile at various skeletal sites after adjusting  
22  
23 for confounding variables, such as age, BMI, smoking status, ethanol consumption, regular  
24  
25 exercise, educational level, income, 25-hydroxy vitamin D, stress level, and tinnitus. Lumbar  
26  
27 skeleton, total femur skeleton, and femoral neck BMD in postmenopausal women showed  
28  
29 significantly decreased tendencies in hearing level as BMD decreased in quartiles ( $P <$   
30  
31  $0.0001$ ; Fig. 1). However, the BMD at the lumbar skeleton ( $P = 0.570$ ), total femur skeleton  
32  
33 ( $P = 0.358$ ), and femur neck ( $P = 0.268$ ) of premenopausal women showed no statistically  
34  
35 significantly association with hearing level. Also those of men showed no statistically  
36  
37 significantly association with hearing level.  
38  
39

40  
41 Table 3 demonstrates the association between hearing impairment and BMD using logistic  
42  
43 regression models. In the final regression model for hearing impairment, the BMDs of the  
44  
45 total femur (OR = 0.779; 95% CI = 0.641–0.946) and femoral neck (OR = 0.746; 95% CI =  
46  
47 0.576–0.966) were significantly associated with hearing impairment among postmenopausal  
48  
49 women after adjusting for age, BMI, smoking status, ethanol intake, regular exercise,  
50  
51 educational level, income, vitamin D, stress level, and tinnitus (Model 3). BMD at the lumbar  
52  
53 spine (OR = 0.525; 95% CI = 0.279–0.989) was also significantly associated with hearing  
54  
55 impairment in premenopausal females. BMD at the total femur, and femoral neck in men and  
56  
57  
58  
59  
60



1  
2  
3  
4 premenopausal women did not show a significant correlation with hearing impairment. To  
5 ascertain the relations between hearing impairment and BMD at several skeletal sites, simple  
6 linear logistic regression analysis was done after adjusting for age, BMI, smoking status,  
7 ethanol intake, regular exercise, educational level, income, 25-hydroxyvitamin D, stress level,  
8 and tinnitus. There was no statistically noteworthy association in hearing impairment and  
9 BMD at any parts of skeletal sites in male, premenopausal and postmenopausal females  
10 (Table 4).  
11  
12  
13  
14  
15  
16  
17  
18  
19  
20

## 21 Discussion

22  
23 The main objective of this research was to examine the association between BMD and  
24 hearing impairment using a nationwide representative example of the South Korean  
25 population. Our findings indicate that low BMDs of the total femur skeleton and femur neck  
26 were related with an increased risk for impairment of hearing function in postmenopausal  
27 females.  
28  
29  
30  
31  
32  
33

34 There have been some previous reports that reduced BMD was closely associated with  
35 hearing impairment.<sup>5,13</sup> The bone mass of the femoral neck was related with hearing loss in a  
36 population of rural females aged 60–85 years.<sup>5</sup> Another research enrolled 2052 older adults  
37 aged 73–84 years using a randomized method. The population was composed of white males  
38 (32.2%), white females (30.8%), black males (15.1%), and black females (22.0%). The  
39 results showed that the BMD of the total hip was not associated with hearing loss in white  
40 males, white females, and black females, but it was in black males.<sup>13</sup> Unlike our results, that  
41 study checked only the BMD of the total hip, and the age range and race of the sample also  
42 differed from those of ours. However, the study did show that there were differences in  
43 hearing impairment by race and sex.  
44  
45  
46  
47  
48  
49  
50  
51  
52  
53  
54  
55  
56  
57  
58  
59  
60

1  
2  
3  
4 The mechanism of hearing impairment in postmenopausal women with lower BMD may  
5  
6 be that demineralization of cochlear capsule of the temporal bone could lead to loss of the  
7  
8 delicate stereocilia of the cochlear.<sup>14</sup> The cochlear capsule is situated in the petrous portion of  
9  
10 the temporal bone. This portion is composed primarily of cancellous bone components.<sup>20</sup> The  
11  
12 demineralization of the cochlear capsule has been related with auditory loss in subjects with  
13  
14 skeletal diseases, such as Paget's disease, otosclerosis, and osteogenesis imperfecta.<sup>7,14,21</sup>  
15  
16 Deteriorated auditory function at a specific frequency has been associated with lower BMD  
17  
18 within the cochlear capsule.<sup>22</sup> Demineralization of the petrous temporal bone affects the  
19  
20 encasing compartment of the cochlear capsule. Spiral ligament hyalinization may be affected  
21  
22 by the toxic effects of enzymes released from otospongiotic foci and can lead to hearing  
23  
24 impairment.<sup>21</sup> Lower BMD of the petrous portion of the temporal bone can affect the  
25  
26 dissipation of cochlear stereocilia and could be a cause of hearing loss in subjects with  
27  
28 sensorineural hearing loss.<sup>22</sup> This phenomenon supports the occurrence of age-related  
29  
30 sensorineural loss and the fact that the severity of cochlear hearing loss is influenced by the  
31  
32 extent of cochlear demineralization.<sup>5,23</sup>  
33  
34  
35

36 Our study showed that differences related to menopause may contribute to relationships  
37  
38 between bone mass and hearing impairment. In this respect, it has been reported that estrogen  
39  
40 can exert a positive effect on hearing among older women.<sup>24</sup> Furthermore, estradiol treatment  
41  
42 may have a positive effect on the ionic homeostasis of the inner ear and the protection of  
43  
44 activated intermediated filaments.<sup>25</sup> Thus, the role of estrogen suggests differences in hearing  
45  
46 impairment among women, such as those between women at the premenopausal and  
47  
48 postmenopausal stages.<sup>26,27</sup> Estrogen may have an important role in the maintenance or repair  
49  
50 of sensory epithelia of the inner ear and may act as an auditory protectant.<sup>28-30</sup>  
51  
52

53 The screening for hearing impairment is important. Because patients, clinicians, family,  
54  
55 and healthcare staff often do not identify hearing loss, exactly in its initial periods, this  
56  
57  
58  
59

1  
2  
3  
4 condition may be undertreated.<sup>31</sup> In addition, hearing impairment may favor the development  
5  
6 of dementia and intellectual dysfunction in grown-ups aged 65 years and older.<sup>32</sup> Hearing  
7  
8 impairment is positively correlated with depression among US grown-ups of all ages,  
9  
10 particularly among females and those younger than 70 years.<sup>12</sup> Therefore, screening tests  
11  
12 based on risk factors are essential, and physicians should be aware of the likelihood of  
13  
14 hearing damage in postmenopausal women.  
15

16  
17 Our study has several limitations. First, we did not directly quantify the BMD of the  
18  
19 cochlear capsule of the temporal bone. There are no data on any association of the BMD  
20  
21 between the in the petrous site of the temporal bone and that of the appendicular skeleton.  
22  
23 However, previous research has indicated that osteoporosis can affect the skull skeletons.  
24  
25 Patients with hyperthyroid-related osteoporosis suffered from decreased skull bone density,  
26  
27 and demineralization of the petrous site of the temporal bone has been gotten in patients with  
28  
29 severe osteoporosis.<sup>33,34</sup> It has been reported that high-resolution computed tomography was  
30  
31 useful for checking the association between the BMD of the petrous portion of the temporal  
32  
33 bone and hearing loss.<sup>35</sup> Under ideal conditions, the BMD of the petrous portion of the  
34  
35 temporal bone would be measured; however, there is no feasible or accurate method for  
36  
37 measuring BMD in large populations. Second, we were incapable of evaluating the temporal  
38  
39 relation between hearing impairment and BMD. Acceptable evaluation of the presence of  
40  
41 hearing impairment is limited for extended periods. Therefore, our research is incapable of  
42  
43 investigating hearing variability in these populations. The final limitation of the our research  
44  
45 was the absence of bone-conduction pure tone testing. This audiometric assessment could not  
46  
47 entirely exclude conductive hearing losses. Despite these limitations, however, no previous  
48  
49 study has evaluated the association between hearing impairment and low BMD in a  
50  
51 representative general female population in Asia. Additionally, these results may be reliable  
52  
53 because the data used were obtained from a government-sponsored survey of the national  
54  
55  
56  
57  
58  
59  
60

1  
2  
3  
4 population of South Korea and were qualified by DXA, validated by audiometry tests, and  
5  
6 verified by otolaryngologists.  
7  
8  
9

## 10 **Conclusion**

11  
12 We found that low BMD in the total femur and femoral neck were associated with  
13  
14 impaired hearing status in postmenopausal women. Future cohort studies with larger sample  
15  
16 sizes and controls for possible confounders are required to clarify the association between  
17  
18 hearing impairment and postmenopause.  
19  
20  
21  
22

## 23 **Acknowledgements**

24  
25 We are grateful to the 150 medical residents of the otorhinolaryngology departments of the  
26  
27 47 training hospitals in South Korea who are members of the Division of Chronic Disease  
28  
29 Surveillance of Korea's Centers for Disease Control & Prevention for their participation in  
30  
31 this survey and for their dedicated work.  
32  
33  
34  
35

36  
37 Contributors : SSL wrote the first draft of the manuscript and took part in the data  
38  
39 analyses. KDH performed statistical analyses. YHJ designed the study and critically revised  
40  
41 the manuscript for important intellectual content.  
42  
43  
44

45  
46 Competing interests: None declared.

47  
48 Funding: This study was supported by a grant from the Korean Health Technology and  
49  
50 Research and Development project, Ministry of Health and Welfare, Republic of Korea  
51  
52 (HC16C2285).  
53

54  
55 Data sharing statement: The KNHANES methodology has been described in detail previously  
56  
57 and further details are listed in "The 5th KNHANES Sample Design" and reports, made  
58  
59  
60

1  
2  
3  
4  
5  
6  
7  
8  
9  
10  
11  
12  
13  
14  
15  
16  
17  
18  
19  
20  
21  
22  
23  
24  
25  
26  
27  
28  
29  
30  
31  
32  
33  
34  
35  
36  
37  
38  
39  
40  
41  
42  
43  
44  
45  
46  
47  
48  
49  
50  
51  
52  
53  
54  
55  
56  
57  
58  
59  
60

accessible on the KNHANES website <https://knhanes.cdc.go.kr/knhanes/index.do>. The KNHANES annual reports, user manuals and instructions, and raw data are available on request.

For peer review only

## References

1. World Health Organization. Prevention and management of osteoporosis. World Health Organ. Tech. Rep. Ser. 2003;921:1–164, back cover.
2. Wade SW, Strader C, Fitzpatrick LA, Anthony MS, O'Malley CD. Estimating prevalence of osteoporosis: examples from industrialized countries. *Arch Osteoporos*. 2014;9:182.
3. Gullberg B, Johnell O, Kanis JA. World-wide projections for hip fracture. *Osteoporos Int*. 1997;7:407–413.
4. Cole ZA, Dennison EM, Cooper C. Osteoporosis epidemiology update. *Curr Rheumatol Rep*. 2008;10:92–96.
5. Clark K, Sowers MR, Wallace RB, Jannausch ML, Lemke J, Anderson CV. Age-related hearing loss and bone mass in a population of rural women aged 60 to 85 years. *Ann Epidemiol*. 1995;5:8–14.
6. Petasnick JP. Tomography of the temporal bone in Paget's disease. *Am. J. Roentgenol. Radium Ther. Nucl. Med*. 1969;105:838–843.
7. Huizing EH, de Groot JA. Densitometry of the cochlear capsule and correlation between bone density loss and bone conduction hearing loss in otosclerosis. *Acta Otolaryngologica*. 1987;103:464–468.
8. Chakeres DW, Weider DJ. Computed tomography of the ossicles. *Neuroradiology*. 1985;27:99–107.
9. World Health Organization. The Global Burden of Disease: 2004 Update. 2008; [http://www.who.int/healthinfo/global\\_burden\\_disease/2004\\_report\\_update/en/](http://www.who.int/healthinfo/global_burden_disease/2004_report_update/en/).
10. Lin FR, Niparko JK, Ferrucci L. Hearing loss prevalence in the United States. *Arch Intern Med*. 2011;171:1851–1852.

11. Hogan A, O'Loughlin K, Miller P, Kendig H. The health impact of a hearing disability on older people in Australia. *J Aging Health*. 2009;21:1098–1111.
12. Li CM, Zhang X, Hoffman HJ, Cotch MF, Themann CL, Wilson MR. Hearing impairment associated with depression in US adults, National Health and Nutrition Examination Survey 2005–2010. *JAMA Otolaryngol Head Neck Surg*. 2014;140:293–302.
13. Helzner EP, Cauley JA, Pratt SR, et al. Race and sex differences in age-related hearing loss: the Health, Aging and Body Composition Study. *J Am Geriatr Soc*. 2005;53:2119–2127.
14. Helzner EP, Cauley JA, Pratt SR, et al. Hearing sensitivity and bone mineral density in older adults: the Health, Aging and Body Composition Study. *Osteoporos. Int*. 2005;16:1675–1682.
15. Park SH, Lee KS, Park HY. Dietary carbohydrate intake is associated with cardiovascular disease risk in Korean: analysis of the third Korea National Health and Nutrition Examination Survey (KNHANES III). *Int. J. Cardiol*. 2010;139:234–240.
16. Park HA. The Korea National Health and Nutrition Examination Survey as a primary data source. *Korean J Fam Med*. 2013;34:79.
17. Swanepoel de W, Mngemane S, Molemong S, Mkwanazi H, Tutshini S. Hearing assessment-reliability, accuracy, and efficiency of automated audiometry. *Telemed J E Health*. 2010;16:557–563.
18. Mahomed F, Swanepoel de W, Eikelboom RH, Soer M. Validity of automated threshold audiometry: a systematic review and meta-analysis. *Ear and Hearing*. 2013;34:745–752.
19. World Health Organization. Millions of people in the world have hearing loss that can be treated or prevented: 2013 update. WHO/NMH/PBD 2013.04; <http://www.who.int/pbd/deafness/news/Millionslivewithhearingloss.pdf>

- 1  
2  
3  
4 20. Swinnen FK, De Leenheer EM, Goemaere S, Cremers CW, Coucke PJ, Dhooge IJ.  
5 Association between bone mineral density and hearing loss in osteogenesis imperfecta.  
6 Laryngoscope. 2012;122:401–408.  
7  
8  
9  
10 21. Guneri EA, Ada E, Ceryan K, Guneri A. High-resolution computed tomographic  
11 evaluation of the cochlear capsule in otosclerosis: relationship between densitometry and  
12 sensorineural hearing loss. The Annals of Otology, Rhinology, and Laryngology.  
13 1996;105:659–664.  
14  
15  
16 22. Swartz JD, Mandell DW, Berman SE, Wolfson RJ, Marlowe FI, Popky GL. Cochlear  
17 otosclerosis (otospongiosis): CT analysis with audiometric correlation. Radiology.  
18 1985;155:147–150.  
19  
20  
21 23. Mendy A, Vieira ER, Albatineh AN, Nnadi AK, Lowry D, Gasana J. Low bone  
22 mineral density is associated with balance and hearing impairments. Ann. Epidemiol.  
23 2014;24:58–62.  
24  
25  
26 24. Frisina RD, Frisina DR. Physiological and neurobiological bases of age-related  
27 hearing loss: biotherapeutic implications. American Journal of Audiology. 2013;22:299–302.  
28  
29  
30 25. Horner KC, Troadec JD, Dallaporta M, Pio J. Effect of chronic estradiol  
31 administration on vimentin and GFAP immunohistochemistry within the inner ear. Neurobiol  
32 Dis. 2009;35:201–208.  
33  
34  
35 26. Gordon-Salant S. Hearing loss and aging: new research findings and clinical  
36 implications. Journal of Rehabilitation Research and Development. 2005;42:9–24.  
37  
38  
39 27. Pearson JD, Morrell CH, Gordon-Salant S, et al. Gender differences in a longitudinal  
40 study of age-associated hearing loss. The Journal of the Acoustical Society of America.  
41 1995;97:1196–1205.  
42  
43  
44 28. Sajan SA, Warchol ME, Lovett M. Toward a systems biology of mouse inner ear  
45 organogenesis: gene expression pathways, patterns and network analysis. Genetics.  
46  
47  
48  
49  
50  
51  
52  
53  
54  
55  
56  
57  
58  
59  
60



1  
2  
3  
4 2007;177:631–653.

5  
6 29. McCullar JS, Oesterle EC. Cellular targets of estrogen signaling in regeneration of  
7 inner ear sensory epithelia. *Hearing Research*. 2009;252:61–70.

8  
9  
10 30. Nolan LS, Maier H, Hermans-Borgmeyer I, et al. Estrogen-related receptor gamma  
11 and hearing function: evidence of a role in humans and mice. *Neurobiology of Aging*.  
12 2013;34:2077 e2071–2079.

13  
14  
15 31. Pacala J, Yueh B. Hearing deficits in the older patient: "I didn't notice anything".  
16  
17 *JAMA*. 2012;307:1185–1194.

18  
19  
20 32. Gurgel RK, Ward PD, Schwartz S, Norton MC, Foster NL, Tschanz JT. Relationship  
21 of hearing loss and dementia: a prospective, population-based study. *Otology & Neurotology*:  
22 Official Publication of the American Otological Society, American Neurotology Society [and]  
23 European Academy of Otology and Neurotology. 2014;35:775–781.

24  
25  
26 33. Meunier P, Bianchi G, Edouard C, Bernard J, Courpron P, Vignon G. Bony  
27 manifestations of thyrotoxicosis. *Orthop Clin North Am*. 1972;3:745–774.

28  
29  
30 34. Khan A, Lore JM, Jr. Osteoporosis relative to head and neck. *J Med*. 1984;15:279–  
31 284.

32  
33  
34 35. Güneri EA, Ada E, Ceryan K, Güneri A. High-resolution computed tomographic  
35 evaluation of the cochlear capsule in otosclerosis: relationship between densitometry and  
36 sensorineural hearing loss. *The Annals of Otology, Rhinology & Laryngology*.  
37 1996;105:659–664.

|                                          | Bilateral Hearing Impairment |                 |         | p-value |
|------------------------------------------|------------------------------|-----------------|---------|---------|
|                                          | No<br>(n= 8214)              | Yes<br>(n= 559) |         |         |
| Age (years)                              | 43.6 ±0.3                    | 69.9±0.6        | <0.0001 |         |
| Average hearing level (dB)               | 10.5±0.2                     | 57.1±1.5        | <0.0001 |         |
| Smoking - Current smoker (%)             | 26.3±1.2                     | 19.5±4.5        | 0.0086  |         |
| Drinking - Heavy drinker (%)             | 10.3±0.9                     | 6.7±2.6         | 0.0311  |         |
| Routine exercise (%)                     | 24.9±1.4                     | 18.9±3.8        | 0.0052  |         |
| Body mass index (kg/m <sup>2</sup> )     | 23.7±0.0                     | 23.8±0.2        | 0.3586  |         |
| Waist circumference (cm)                 | 80.7±0.2                     | 83.7±0.5        | <0.0001 |         |
| Education - ≥High school (%)             | 73.0±1.8                     | 14.6±3.8        | <0.0001 |         |
| Residential area - Urban (%)             | 81.1±4.5                     | 67.7±8.6        | <0.0001 |         |
| Income - Lower quartile (%)              | 14.9±1.5                     | 50.0±4.8        | <0.0001 |         |
| Stress – Moderate to severe (%)          | 30.4±1.3                     | 25.8±5.1        | 0.0937  |         |
| 25-Hydroxyvitamin D (ng/ml)              | 18.5±0.2                     | 20.2±0.6        | 0.0013  |         |
| BMD of lumbar spine (g/cm <sup>2</sup> ) | 0.947±0.002                  | 0.841±0.008     | <0.0001 |         |
| BMD of total femur (g/cm <sup>2</sup> )  | 0.929±0.002                  | 0.799±0.008     | <0.0001 |         |
| BMD of femoral neck (g/cm <sup>2</sup> ) | 0.778±0.002                  | 0.629±0.008     | <0.0001 |         |

TABLE 1.

SUBJECT

CHARACTERISTI

CS

\* P < 0.05 was considered to be statistically significant.

|                                      | Men<br>(n=3885) | Premenopausal<br>women (n=2622) | Postmenopausal<br>women (n=2266) | p-value  | TABL<br>E 2.<br>SUBJE<br>CT<br>CHAR<br>ACTE<br>RISTI<br>CS<br>ACCO<br>RDING<br>TO<br>BILAT |
|--------------------------------------|-----------------|---------------------------------|----------------------------------|----------|--------------------------------------------------------------------------------------------|
| Age (years)                          | 43.9±0.3        | 35.3±0.2                        | 62.7±0.3                         | <0.0001* |                                                                                            |
| Average hearing level (dB)           | 19.1±0.4        | 12.3±0.4                        | 30.6±0.8                         | <0.0001* |                                                                                            |
| Smoking - Current smoker (%)         | 45.4±1.0        | 7.1±0.7                         | 4.6±0.6                          | <0.0001* |                                                                                            |
| Drinking - Heavy drinker (%)         | 18.2±0.8        | 2.6±0.4                         | 0.9±0.2                          | <0.0001* |                                                                                            |
| Routine exercise (%)                 | 27.3±0.8        | 21.3±1.0                        | 22.6±1.3                         | <0.0001* |                                                                                            |
| Body mass index (kg/m <sup>2</sup> ) | 24.1±0.1        | 22.6±0.1                        | 24.3±0.1                         | <0.0001* |                                                                                            |
| Waist circumference (cm)             | 84.0±0.2        | 74.8±0.3                        | 82.3±0.3                         | <0.0001* |                                                                                            |
| Education - ≥High school (%)         | 77.0±0.9        | 89.7±0.7                        | 20.7±1.3                         | <0.0001* |                                                                                            |
| Residential area - Urban (%)         | 80.1±2.3        | 85.8±2.0                        | 73.2±2.9                         | <0.0001* |                                                                                            |
| Income - Lower quartile (%)          | 14.5±0.8        | 9.6±0.8                         | 33.0±1.4                         | <0.0001* |                                                                                            |
| Stress – Moderate to severe (%)      | 27.4±0.9        | 35.2±1.1                        | 29.8±1.3                         | <0.0001* |                                                                                            |
| 25-Hydroxyvitamin D (ng/ml)          | 19.8±0.2        | 16.4±0.2                        | 19.0±0.3                         | <0.0001* |                                                                                            |

## ER HEARING IMPAIRMENT

|                                          |             |             |             |          |
|------------------------------------------|-------------|-------------|-------------|----------|
| BMD of lumbar spine (g/cm <sup>2</sup> ) | 0.971±0.003 | 0.977±0.003 | 0.807±0.004 | <0.0001* |
| BMD of total femur (g/cm <sup>2</sup> )  | 0.986±0.003 | 0.905±0.003 | 0.782±0.003 | <0.0001* |
| BMD of femoral neck (g/cm <sup>2</sup> ) | 0.829±0.003 | 0.765±0.003 | 0.626±0.003 | <0.0001* |
| Hearing loss (%)                         | 4.6±0.4     | 0.2±0.1     | 11.5±1.1    | <0.0001* |

|  | Men | Premenopausal women | Postmenopausal women |
|--|-----|---------------------|----------------------|
|--|-----|---------------------|----------------------|

Data are presented as mean ± SE (standard error)

TABLE 3. MULTIVARIABLE LOGISTIC REGRESSION ANALYSIS OF ADJUSTED ODD RATIOS (ORs) AND 95% CONFIDENCE INTERVALS (CIs) TO DETERMINE THE EFFECT OF BONE MINERAL DENSITY ON HEARING IMPAIRMENT.

| Lumbar spine |                    |                    |                    |
|--------------|--------------------|--------------------|--------------------|
| Model 1      | 0.999(0.892-1.118) | 0.486(0.276-0.856) | 0.921(0.812-1.044) |
| Model 2      | 1.052(0.939-1.178) | 0.528(0.273-1.020) | 0.966(0.849-1.098) |
| Model 3      | 1.058(0.937-1.195) | 0.525(0.270-0.999) | 0.960(0.835-1.105) |
| Total femur  |                    |                    |                    |
| Model 1      | 0.948(0.821-1.095) | 0.683(0.323-1.444) | 0.804(0.673-0.959) |
| Model 2      | 0.985(0.851-1.140) | 0.756(0.348-1.640) | 0.820(0.686-0.981) |
| Model 3      | 1.009(0.855-1.190) | 0.758(0.338-1.703) | 0.779(0.641-0.946) |
| Femoral neck |                    |                    |                    |
| Model 1      | 0.874(0.727-1.050) | 0.878(0.412-1.868) | 0.760(0.608-0.950) |
| Model 2      | 0.914(0.761-1.099) | 0.970(0.432-2.180) | 0.783(0.623-0.984) |
| Model 3      | 0.919(0.747-1.130) | 0.953(0.400-2.272) | 0.746(0.576-0.966) |

Model 1 is adjusted for age and body mass index.

Model 2 is adjusted for age, body mass index, smoking status, ethanol intake, regular exercise, educational level, and income.

Model 3 is adjusted for age, body mass index, smoking status, ethanol intake, regular exercise, educational level, income, 25-hydroxyvitamin D, stress level, and tinnitus.

#### TABLE 4. MULTIVARIABLE LOGISTIC REGRESSION ANALYSIS IN BONE MINERAL DENSITY

|              | Beta    | SE     | p-value | Beta    | SE     | p-value | Beta    | SE     | p-value |
|--------------|---------|--------|---------|---------|--------|---------|---------|--------|---------|
| Lumbar spine |         |        |         |         |        |         |         |        |         |
| Model 1      | -0.2899 | 0.2570 | 0.2604  | -0.1820 | 0.1338 | 0.1753  | -0.0778 | 0.1560 | 0.6186  |
| Model 2      | -0.0194 | 0.2472 | 0.9375  | -0.1244 | 0.1320 | 0.3471  | 0.1261  | 0.1449 | 0.3847  |
| Model 3      | 0.0777  | 0.2517 | 0.7578  | -0.1400 | 0.1365 | 0.3063  | 0.1055  | 0.1482 | 0.4772  |
| Total femur  |         |        |         |         |        |         |         |        |         |
| Model 1      | -1.1271 | 0.3862 | 0.0038  | 0.0260  | 0.1426 | 0.8553  | -0.2160 | 0.1653 | 0.1924  |
| Model 2      | -1.0141 | 0.3913 | 0.0101  | 0.0034  | 0.1454 | 0.8118  | -0.0549 | 0.1586 | 0.7296  |
| Model 3      | -0.8842 | 0.3892 | 0.0240  | 0.0266  | 0.1511 | 0.8609  | -0.0038 | 0.1690 | 0.8201  |
| Femoral neck |         |        |         |         |        |         |         |        |         |
| Model 1      | -0.8639 | 0.4739 | 0.0695  | 0.1211  | 0.1328 | 0.3625  | -0.0713 | 0.1646 | 0.6650  |
| Model 2      | -0.6742 | 0.4917 | 0.1716  | 0.1004  | 0.1335 | 0.4528  | 0.0031  | 0.1565 | 0.8409  |
| Model 3      | -0.5278 | 0.4737 | 0.2663  | 0.0847  | 0.1392 | 0.5433  | -0.0006 | 0.1648 | 0.9969  |

Model 1 is adjusted for age and body mass index.

Model 2 is adjusted for age, body mass index, smoking status, ethanol intake, regular exercise, educational level, and income.

Model 3 is adjusted for age, body mass index, smoking status, ethanol intake, regular exercise, educational level, income, 25-hydroxyvitamin D, stress level, and tinnitus.

Results were represented as a estimated beta with corresponding standard error ( SE) and p-value

### Figure legend

**Figure 1.** Mean values of hearing level according to bone mineral density for premenopausal

1  
2  
3  
4 (A) postmenopausal (B) women and men(C). After categorizing subjects into four groups  
5 based on BMD (quartile 1, with the highest, to quartile 4, with the lowest) in the lumbar spine,  
6 total femur, and femur neck, we found a tendency toward significantly decreased hearing as a  
7 function of quartile decreases in BMD among postmenopausal women.  
8  
9  
10  
11

12 \* P < 0.05 was considered to be statistically significant.  
13  
14  
15  
16  
17  
18  
19  
20  
21  
22  
23  
24  
25  
26  
27  
28  
29  
30  
31  
32  
33  
34  
35  
36  
37  
38  
39  
40  
41  
42  
43  
44  
45  
46  
47  
48  
49  
50  
51  
52  
53  
54  
55  
56  
57  
58  
59  
60

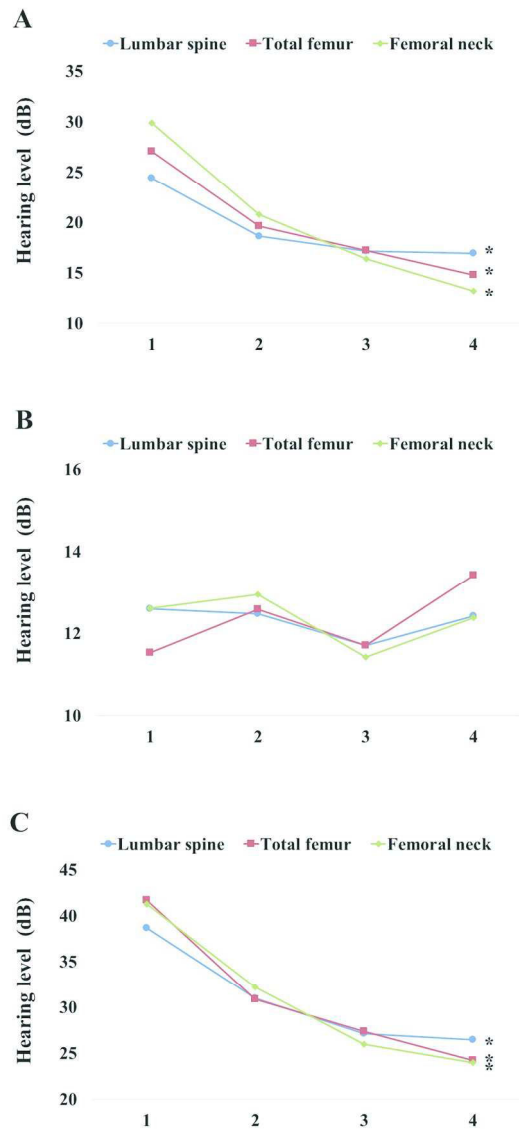

Mean values of hearing level according to bone mineral density for premenopausal (A) postmenopausal (B) women and men(C). After categorizing subjects into four groups based on BMD (quartile 1, with the highest, to quartile 4, with the lowest) in the lumbar spine, total femur, and femur neck, we found a tendency toward significantly decreased hearing as a function of quartile decreases in BMD among postmenopausal women. \* P < 0.05 was considered to be statistically significant.

112x253mm (600 x 600 DPI)



STROBE Statement—checklist of items that should be included in reports of observational studies

|                           | Item No. | Recommendation                                                                                                                                                                                                                                                                                                                                                                                                                                            | Page No.       | Relevant text from manuscript                                                                                                     |
|---------------------------|----------|-----------------------------------------------------------------------------------------------------------------------------------------------------------------------------------------------------------------------------------------------------------------------------------------------------------------------------------------------------------------------------------------------------------------------------------------------------------|----------------|-----------------------------------------------------------------------------------------------------------------------------------|
| <b>Title and abstract</b> | 1        | (a) Indicate the study’s design with a commonly used term in the title or the abstract                                                                                                                                                                                                                                                                                                                                                                    | Page 1 (title) | The Korea National Health and Nutrition Examination Survey                                                                        |
|                           |          | (b) Provide in the abstract an informative and balanced summary of what was done and what was found                                                                                                                                                                                                                                                                                                                                                       | Page 2         | Abstract                                                                                                                          |
| <b>Introduction</b>       |          |                                                                                                                                                                                                                                                                                                                                                                                                                                                           |                |                                                                                                                                   |
| Background/rationale      | 2        | Explain the scientific background and rationale for the investigation being reported                                                                                                                                                                                                                                                                                                                                                                      | Page 3         | Several studies have evaluated the association between BMD and hearing sensitivity.                                               |
| Objectives                | 3        | State specific objectives, including any prespecified hypotheses                                                                                                                                                                                                                                                                                                                                                                                          | Page 4         | We sought to evaluate the relationship between BMD and hearing impairment in a nationally representative sample of Korean adults. |
| <b>Methods</b>            |          |                                                                                                                                                                                                                                                                                                                                                                                                                                                           |                |                                                                                                                                   |
| Study design              | 4        | Present key elements of study design early in the paper                                                                                                                                                                                                                                                                                                                                                                                                   | Page 5         | KNHANES is a nationwide survey designed to assess national health and nutrition levels accurately                                 |
| Setting                   | 5        | Describe the setting, locations, and relevant dates, including periods of recruitment, exposure, follow-up, and data collection                                                                                                                                                                                                                                                                                                                           | Page 5         | This study was based on data collected during the 2010–2012 KNHANES (Korea Centers for Disease Control and Prevention)            |
| Participants              | 6        | (a) <i>Cohort study</i> —Give the eligibility criteria, and the sources and methods of selection of participants. Describe methods of follow-up<br><i>Case-control study</i> —Give the eligibility criteria, and the sources and methods of case ascertainment and control selection. Give the rationale for the choice of cases and controls<br><i>Cross-sectional study</i> —Give the eligibility criteria, and the sources and methods of selection of | Page 5         | The sample included 12,499 participants aged over 19 years.                                                                       |

|                           |    |                                                                                                                                                                                      |                  |                                                                                                                                                                                                                                                                 |
|---------------------------|----|--------------------------------------------------------------------------------------------------------------------------------------------------------------------------------------|------------------|-----------------------------------------------------------------------------------------------------------------------------------------------------------------------------------------------------------------------------------------------------------------|
|                           |    | participants                                                                                                                                                                         |                  |                                                                                                                                                                                                                                                                 |
|                           |    | (b) <i>Cohort study</i> —For matched studies, give matching criteria and number of exposed and unexposed                                                                             |                  |                                                                                                                                                                                                                                                                 |
|                           |    | <i>Case-control study</i> —For matched studies, give matching criteria and the number of controls per case                                                                           |                  |                                                                                                                                                                                                                                                                 |
| Variables                 | 7  | Clearly define all outcomes, exposures, predictors, potential confounders, and effect modifiers. Give diagnostic criteria, if applicable                                             | Page 5, 6, and 7 | tinnitus, Smoking history, alcohol absorption, Regular exercise, Weight and height, Body mass index (BMI), Waist circumference (WC), and Metabolic syndrome                                                                                                     |
| Data sources/ measurement | 8* | For each variable of interest, give sources of data and details of methods of assessment (measurement). Describe comparability of assessment methods if there is more than one group | Page 5           | The survey consists of a health interview, a nutritional survey, and a health examination survey. The survey amasses data via household interviews and by direct standardized physical examinations conducted in specially equipped mobile examination centers. |
| Bias                      | 9  | Describe any efforts to address potential sources of bias                                                                                                                            | Page 8           | We first adjusted for age (model 1), adjusted for age, BMI, smoking status, alcohol intake, and regular exercise (model 2), and adjusted for age, BMI, smoking status, alcohol intake, regular exercise, metabolic syndrome, stress, and tinnitus (model 3).    |
| Study size                | 10 | Explain how the study size was arrived at                                                                                                                                            | Page 5           | This study was based on data collected during the 2010–2012                                                                                                                                                                                                     |

1  
2  
3  
4  
5  
6  
7  
8  
9  
10  
11  
12  
13  
14  
15  
16  
17  
18  
19  
20  
21  
22  
23  
24  
25  
26  
27  
28  
29  
30  
31  
32  
33  
34  
35  
36  
37  
38  
39  
40  
41  
42  
43  
44  
45  
46  
47

---

KNHANES (Korea Centers for  
Disease Control and  
Prevention).

---

Continued on next page

For peer review only

|    |                        |    |                                                                                                                              |                  |                                                                                                                                                                                                                                                                                                                                                                                                                                                                                                                                                                    |
|----|------------------------|----|------------------------------------------------------------------------------------------------------------------------------|------------------|--------------------------------------------------------------------------------------------------------------------------------------------------------------------------------------------------------------------------------------------------------------------------------------------------------------------------------------------------------------------------------------------------------------------------------------------------------------------------------------------------------------------------------------------------------------------|
| 1  |                        |    |                                                                                                                              |                  |                                                                                                                                                                                                                                                                                                                                                                                                                                                                                                                                                                    |
| 2  |                        |    |                                                                                                                              |                  |                                                                                                                                                                                                                                                                                                                                                                                                                                                                                                                                                                    |
| 3  |                        |    |                                                                                                                              |                  |                                                                                                                                                                                                                                                                                                                                                                                                                                                                                                                                                                    |
| 4  | Quantitative variables | 11 | Explain how quantitative variables were handled in the analyses. If applicable, describe which groupings were chosen and why | Page 5, 6, and 7 | The BMD values of the lumbar spine (L1–L4), femoral neck, and total femur were measured using dual-energy X-ray absorptiometry (DXA) using a Discovery fan-beam densitometer (Hologic, Bedford, MA, USA) and the Hologic Discovery software (ver. 3.1). Smoking history was categorized into the three groups: current smoker, ex-smoker and non-smoker. Subjects who drank more than 30 g/day were designated as heavy drinkers. Regular exercise was defined as strenuous physical activity performed for at least 20 min at a time at least three times a week. |
| 5  |                        |    |                                                                                                                              |                  |                                                                                                                                                                                                                                                                                                                                                                                                                                                                                                                                                                    |
| 6  |                        |    |                                                                                                                              |                  |                                                                                                                                                                                                                                                                                                                                                                                                                                                                                                                                                                    |
| 7  |                        |    |                                                                                                                              |                  |                                                                                                                                                                                                                                                                                                                                                                                                                                                                                                                                                                    |
| 8  |                        |    |                                                                                                                              |                  |                                                                                                                                                                                                                                                                                                                                                                                                                                                                                                                                                                    |
| 9  |                        |    |                                                                                                                              |                  |                                                                                                                                                                                                                                                                                                                                                                                                                                                                                                                                                                    |
| 10 |                        |    |                                                                                                                              |                  |                                                                                                                                                                                                                                                                                                                                                                                                                                                                                                                                                                    |
| 11 |                        |    |                                                                                                                              |                  |                                                                                                                                                                                                                                                                                                                                                                                                                                                                                                                                                                    |
| 12 |                        |    |                                                                                                                              |                  |                                                                                                                                                                                                                                                                                                                                                                                                                                                                                                                                                                    |
| 13 |                        |    |                                                                                                                              |                  |                                                                                                                                                                                                                                                                                                                                                                                                                                                                                                                                                                    |
| 14 |                        |    |                                                                                                                              |                  |                                                                                                                                                                                                                                                                                                                                                                                                                                                                                                                                                                    |
| 15 |                        |    |                                                                                                                              |                  |                                                                                                                                                                                                                                                                                                                                                                                                                                                                                                                                                                    |
| 16 |                        |    |                                                                                                                              |                  |                                                                                                                                                                                                                                                                                                                                                                                                                                                                                                                                                                    |
| 17 |                        |    |                                                                                                                              |                  |                                                                                                                                                                                                                                                                                                                                                                                                                                                                                                                                                                    |
| 18 |                        |    |                                                                                                                              |                  |                                                                                                                                                                                                                                                                                                                                                                                                                                                                                                                                                                    |
| 19 |                        |    |                                                                                                                              |                  |                                                                                                                                                                                                                                                                                                                                                                                                                                                                                                                                                                    |
| 20 |                        |    |                                                                                                                              |                  |                                                                                                                                                                                                                                                                                                                                                                                                                                                                                                                                                                    |
| 21 |                        |    |                                                                                                                              |                  |                                                                                                                                                                                                                                                                                                                                                                                                                                                                                                                                                                    |
| 22 |                        |    |                                                                                                                              |                  |                                                                                                                                                                                                                                                                                                                                                                                                                                                                                                                                                                    |
| 23 |                        |    |                                                                                                                              |                  |                                                                                                                                                                                                                                                                                                                                                                                                                                                                                                                                                                    |
| 24 |                        |    |                                                                                                                              |                  |                                                                                                                                                                                                                                                                                                                                                                                                                                                                                                                                                                    |
| 25 | Statistical methods    | 12 | (a) Describe all statistical methods, including those used to control for confounding                                        | Page 6 and 7     | The prevalence and 95% confidence intervals (CIs) for dizziness were calculated. In the univariate analysis, the Rao-Scott chi-square test (using PROC SURVEYFREQ in SAS) and logistic regression analysis (using PROC SURVEYLOGISTIC in SAS) were used to test the association between gender and risk factors in a complex sampling design. Participants' characteristics were described using means and standard errors for continuous                                                                                                                          |
| 26 |                        |    |                                                                                                                              |                  |                                                                                                                                                                                                                                                                                                                                                                                                                                                                                                                                                                    |
| 27 |                        |    |                                                                                                                              |                  |                                                                                                                                                                                                                                                                                                                                                                                                                                                                                                                                                                    |
| 28 |                        |    |                                                                                                                              |                  |                                                                                                                                                                                                                                                                                                                                                                                                                                                                                                                                                                    |
| 29 |                        |    |                                                                                                                              |                  |                                                                                                                                                                                                                                                                                                                                                                                                                                                                                                                                                                    |
| 30 |                        |    |                                                                                                                              |                  |                                                                                                                                                                                                                                                                                                                                                                                                                                                                                                                                                                    |
| 31 |                        |    |                                                                                                                              |                  |                                                                                                                                                                                                                                                                                                                                                                                                                                                                                                                                                                    |
| 32 |                        |    |                                                                                                                              |                  |                                                                                                                                                                                                                                                                                                                                                                                                                                                                                                                                                                    |
| 33 |                        |    |                                                                                                                              |                  |                                                                                                                                                                                                                                                                                                                                                                                                                                                                                                                                                                    |
| 34 |                        |    |                                                                                                                              |                  |                                                                                                                                                                                                                                                                                                                                                                                                                                                                                                                                                                    |
| 35 |                        |    |                                                                                                                              |                  |                                                                                                                                                                                                                                                                                                                                                                                                                                                                                                                                                                    |
| 36 |                        |    |                                                                                                                              |                  |                                                                                                                                                                                                                                                                                                                                                                                                                                                                                                                                                                    |
| 37 |                        |    |                                                                                                                              |                  |                                                                                                                                                                                                                                                                                                                                                                                                                                                                                                                                                                    |
| 38 |                        |    |                                                                                                                              |                  |                                                                                                                                                                                                                                                                                                                                                                                                                                                                                                                                                                    |
| 39 |                        |    |                                                                                                                              |                  |                                                                                                                                                                                                                                                                                                                                                                                                                                                                                                                                                                    |
| 40 |                        |    |                                                                                                                              |                  |                                                                                                                                                                                                                                                                                                                                                                                                                                                                                                                                                                    |
| 41 |                        |    |                                                                                                                              |                  |                                                                                                                                                                                                                                                                                                                                                                                                                                                                                                                                                                    |

1  
2  
3  
4  
5  
6  
7  
8  
9  
10  
11  
12  
13  
14  
15  
16  
17  
18  
19  
20  
21  
22  
23  
24  
25  
26  
27  
28  
29  
30  
31  
32  
33  
34  
35  
36  
37  
38  
39  
40  
41  
42  
43  
44  
45  
46  
47

variables and numbers and percentages for categorical variables. A final logistic regression model was used to examine the association between sleep duration and dizziness.

|                                                                                                                                                                                                                                                                                                           |              |                                                                                                                                                                                                                                                                                                                                                                                                                        |
|-----------------------------------------------------------------------------------------------------------------------------------------------------------------------------------------------------------------------------------------------------------------------------------------------------------|--------------|------------------------------------------------------------------------------------------------------------------------------------------------------------------------------------------------------------------------------------------------------------------------------------------------------------------------------------------------------------------------------------------------------------------------|
| (b) Describe any methods used to examine subgroups and interactions                                                                                                                                                                                                                                       | Page 6 and 7 | Same as the above.                                                                                                                                                                                                                                                                                                                                                                                                     |
| (c) Explain how missing data were addressed                                                                                                                                                                                                                                                               | Page 6 and 7 | Statistical analyses were performed using the SAS survey procedure (ver. 9.3; SAS Institute, Cary, NC, USA) to reflect the complex sampling design and sampling weights of KNHANES and to provide nationally representative prevalence estimates. The procedures included unequal probabilities of selection, oversampling, and nonresponse so that inferences could be made about the Korean adolescent participants. |
| (d) <i>Cohort study</i> —If applicable, explain how loss to follow-up was addressed<br><i>Case-control study</i> —If applicable, explain how matching of cases and controls was addressed<br><i>Cross-sectional study</i> —If applicable, describe analytical methods taking account of sampling strategy |              |                                                                                                                                                                                                                                                                                                                                                                                                                        |
| (e) Describe any sensitivity analyses                                                                                                                                                                                                                                                                     |              |                                                                                                                                                                                                                                                                                                                                                                                                                        |

**Results**

|              |     |                                                                                                                                                                                                   |        |                                                                                                                                                                    |
|--------------|-----|---------------------------------------------------------------------------------------------------------------------------------------------------------------------------------------------------|--------|--------------------------------------------------------------------------------------------------------------------------------------------------------------------|
| Participants | 13* | (a) Report numbers of individuals at each stage of study—eg numbers potentially eligible, examined for eligibility, confirmed eligible, included in the study, completing follow-up, and analysed | Page 9 | There were 12,499 respondents in our study, comprising 5406 (43.25%) males and 7093 (56.75%) females, and 2690 had experienced dizziness or imbalance in the prior |
|--------------|-----|---------------------------------------------------------------------------------------------------------------------------------------------------------------------------------------------------|--------|--------------------------------------------------------------------------------------------------------------------------------------------------------------------|

|                  |     |                                                                                                                                                                                                              |        |                                                                                                                                                                                                                                                                                                                                              |
|------------------|-----|--------------------------------------------------------------------------------------------------------------------------------------------------------------------------------------------------------------|--------|----------------------------------------------------------------------------------------------------------------------------------------------------------------------------------------------------------------------------------------------------------------------------------------------------------------------------------------------|
|                  |     |                                                                                                                                                                                                              |        | 12 months.                                                                                                                                                                                                                                                                                                                                   |
|                  |     | (b) Give reasons for non-participation at each stage                                                                                                                                                         | Page 9 | Same as the above.                                                                                                                                                                                                                                                                                                                           |
|                  |     | (c) Consider use of a flow diagram                                                                                                                                                                           |        |                                                                                                                                                                                                                                                                                                                                              |
| Descriptive data | 14* | (a) Give characteristics of study participants (eg demographic, clinical, social) and information on exposures and potential confounders                                                                     | Page 9 | The baseline characteristics of the study subjects according to gender are shown in Table 1.                                                                                                                                                                                                                                                 |
|                  |     | (b) Indicate number of participants with missing data for each variable of interest                                                                                                                          | Page 9 | There were 12,499 respondents in our study, comprising 5406 (43.25%) males and 7093 (56.75%) females, and 2690 had experienced dizziness or imbalance in the prior 12 months.                                                                                                                                                                |
|                  |     | (c) <i>Cohort study</i> —Summarise follow-up time (eg, average and total amount)                                                                                                                             |        |                                                                                                                                                                                                                                                                                                                                              |
| Outcome data     | 15* | <i>Cohort study</i> —Report numbers of outcome events or summary measures over time                                                                                                                          |        |                                                                                                                                                                                                                                                                                                                                              |
|                  |     | <i>Case-control study</i> —Report numbers in each exposure category, or summary measures of exposure                                                                                                         |        |                                                                                                                                                                                                                                                                                                                                              |
|                  |     | <i>Cross-sectional study</i> —Report numbers of outcome events or summary measures                                                                                                                           | Page 9 | There were 12,499 respondents in our study, comprising 5406 (43.25%) males and 7093 (56.75%) females, and 2690 had experienced dizziness or imbalance in the prior 12 months.                                                                                                                                                                |
| Main results     | 16  | (a) Give unadjusted estimates and, if applicable, confounder-adjusted estimates and their precision (eg, 95% confidence interval). Make clear which confounders were adjusted for and why they were included | Page 9 | The adjusted OR for sleep duration is not significant in dizziness for men. Meanwhile, the risk of dizziness was significantly associated with sleep duration in only women. Compared to participants with optimal sleep duration (six to eight hours), those with severe short sleep duration ( $\leq 5$ hours) (OR [95% CI]: 1.566 [1.289- |

1  
2  
3  
4  
5  
6  
7  
8  
9  
10  
11  
12  
13  
14  
15  
16  
17  
18  
19  
20  
21  
22  
23  
24  
25  
26  
27  
28  
29  
30  
31  
32  
33  
34  
35  
36  
37  
38  
39  
40  
41  
42  
43  
44  
45  
46  
47

For peer review only

1.903] in model 1, OR [95% CI]: 1.557 [1.276-1.898] in model 2, and OR [95% CI]: 1.473 [1.194-1.818] in model 3) and severe long sleep duration ( $\geq 9$  hours) (OR [95% CI]: 1.420 [1.042-1.936] in model 1, OR [95% CI]: 1.418 [1.040-1.934] in model 2, and OR [95% CI]: 1.472 [1.078-2.009] in model 3) had an increased dizziness risk after adjusting for the confounders.

|                                                                                  |        |                                                                                                                                                                           |
|----------------------------------------------------------------------------------|--------|---------------------------------------------------------------------------------------------------------------------------------------------------------------------------|
| <i>(b)</i> Report category boundaries when continuous variables were categorized | Page 9 | Among variables regarding health behavior patterns, current smoker, heavy drinker, routine exercise, job, and waist circumference were significantly associated with men. |
|----------------------------------------------------------------------------------|--------|---------------------------------------------------------------------------------------------------------------------------------------------------------------------------|

*(c)* If relevant, consider translating estimates of relative risk into absolute risk for a meaningful time period

Continued on next page

1  
2  
3  
4  
5  
6  
7  
8  
9  
10  
11  
12  
13  
14  
15  
16  
17  
18  
19  
20  
21  
22  
23  
24  
25  
26  
27  
28  
29  
30  
31  
32  
33  
34  
35  
36  
37  
38  
39  
40  
41  
42  
43  
44  
45  
46  
47

|                   |    |                                                                                                                                                            |         |                                                                                                                                                                                                                                                                                                                                                                                                                                                                                                                                                                                                                                                                                                                                                                                                                                                                          |
|-------------------|----|------------------------------------------------------------------------------------------------------------------------------------------------------------|---------|--------------------------------------------------------------------------------------------------------------------------------------------------------------------------------------------------------------------------------------------------------------------------------------------------------------------------------------------------------------------------------------------------------------------------------------------------------------------------------------------------------------------------------------------------------------------------------------------------------------------------------------------------------------------------------------------------------------------------------------------------------------------------------------------------------------------------------------------------------------------------|
| Other analyses    | 17 | Report other analyses done—eg analyses of subgroups and interactions, and sensitivity analyses                                                             |         |                                                                                                                                                                                                                                                                                                                                                                                                                                                                                                                                                                                                                                                                                                                                                                                                                                                                          |
| <b>Discussion</b> |    |                                                                                                                                                            |         |                                                                                                                                                                                                                                                                                                                                                                                                                                                                                                                                                                                                                                                                                                                                                                                                                                                                          |
| Key results       | 18 | Summarise key results with reference to study objectives                                                                                                   | Page 10 | abnormal sleep duration such as short or long duration are associated with dizziness in women                                                                                                                                                                                                                                                                                                                                                                                                                                                                                                                                                                                                                                                                                                                                                                            |
| Limitations       | 19 | Discuss limitations of the study, taking into account sources of potential bias or imprecision. Discuss both direction and magnitude of any potential bias | Page 12 | By contrast, this study also had several limitations. First, sleep duration and dizziness were reported only by respondents and were not recorded or observed directly. This may bias our results, as there is only modest correlation between reported and recorded sleep. Although there were some researches with objective sleep data, those measures are not practical for large, nationally representative samples. Furthermore, self-reported sleep duration has been used widely in epidemiological studies examining the relationship between sleep duration and morbidity and mortality. Secondly, our data consider only abnormal duration of sleep. Additional sleep problems, such as snoring, apnea and daytime sleepiness, should be investigated in future studies. Third, the related variables of which the presence or absence may be associated with |



1  
2  
3  
4  
5  
6  
7  
8  
9  
10  
11  
12  
13  
14  
15  
16  
17  
18  
19  
20  
21  
22  
23  
24  
25  
26  
27  
28  
29  
30  
31  
32  
33  
34  
35  
36  
37  
38  
39  
40  
41  
42  
43  
44  
45  
46  
47

|                          |    |                                                                                                                                                                            |         |                                                                                                                                                                                                                |
|--------------------------|----|----------------------------------------------------------------------------------------------------------------------------------------------------------------------------|---------|----------------------------------------------------------------------------------------------------------------------------------------------------------------------------------------------------------------|
|                          |    |                                                                                                                                                                            |         | vestibular dysfunction and could affect the results were not able to be evaluated and the participants with other acute disease status, such as BPPV, were not able to be excluded from this study.            |
| Interpretation           | 20 | Give a cautious overall interpretation of results considering objectives, limitations, multiplicity of analyses, results from similar studies, and other relevant evidence | Page 12 | Same as the above.                                                                                                                                                                                             |
| Generalisability         | 21 | Discuss the generalisability (external validity) of the study results                                                                                                      | Page 13 | KNHANES is a nationwide cross-sectional study to select a representative sample of the Korean population. This survey employed stratified multi-stage design based on age, sex, and residence geographic area. |
| <b>Other information</b> |    |                                                                                                                                                                            |         |                                                                                                                                                                                                                |
| Funding                  | 22 | Give the source of funding and the role of the funders for the present study and, if applicable, for the original study on which the present article is based              |         | No funding source                                                                                                                                                                                              |

\*Give information separately for cases and controls in case-control studies and, if applicable, for exposed and unexposed groups in cohort and cross-sectional studies.

**Note:** An Explanation and Elaboration article discusses each checklist item and gives methodological background and published examples of transparent reporting. The STROBE checklist is best used in conjunction with this article (freely available on the Web sites of PLoS Medicine at <http://www.plosmedicine.org/>, Annals of Internal Medicine at <http://www.annals.org/>, and Epidemiology at <http://www.epidem.com/>). Information on the STROBE Initiative is available at [www.strobe-statement.org](http://www.strobe-statement.org).

# BMJ Open

## Association between Low Bone Mineral Density and Hearing Impairment in Postmenopausal Women: the Korean National Health and Nutrition Examination Survey

|                                 |                                                                                                                                                                                                                                      |
|---------------------------------|--------------------------------------------------------------------------------------------------------------------------------------------------------------------------------------------------------------------------------------|
| Journal:                        | <i>BMJ Open</i>                                                                                                                                                                                                                      |
| Manuscript ID                   | bmjopen-2017-018763.R2                                                                                                                                                                                                               |
| Article Type:                   | Research                                                                                                                                                                                                                             |
| Date Submitted by the Author:   | 13-Dec-2017                                                                                                                                                                                                                          |
| Complete List of Authors:       | Lee, Seong-Su; Seoul Natl Univ Han, Kyungdo; Catholic University of Korea School of Medicine, Department of Biostatistics<br>Joo, Young-Hoon; The Catholic University of Korea, Department of Otolaryngology, Head and Neck Surgery, |
| <b>Primary Subject Heading</b>: | Diabetes and endocrinology                                                                                                                                                                                                           |
| Secondary Subject Heading:      | Ear, nose and throat/otolaryngology                                                                                                                                                                                                  |
| Keywords:                       | hearing impairment, bone mineral density, Epidemiology < TROPICAL MEDICINE                                                                                                                                                           |
|                                 |                                                                                                                                                                                                                                      |

SCHOLARONE™  
Manuscripts

1  
2  
3  
4 **Association between Low Bone Mineral Density and Hearing Impairment in**  
5 **Postmenopausal Women: the Korean National Health and Nutrition Examination**  
6 **Survey**  
7  
8  
9

10  
11  
12 **Seong-Su Lee, MD, PhD,<sup>1</sup> Kyung-do Han, MPH,<sup>2</sup> and Young-Hoon Joo MD, PhD<sup>3</sup>**  
13  
14

15  
16  
17 <sup>1</sup>Division of Endocrinology and Metabolism, Department of Internal Medicine,  
18

19 <sup>2</sup>Department of Biostatistics, <sup>3</sup>Department of Otolaryngology-Head and Neck Surgery,  
20  
21 College of Medicine, The Catholic University of Korea, Seoul, Korea  
22  
23

24  
25 Running title: Bone Mineral Density and Hearing Status  
26  
27

28  
29 \*Corresponding author: Young-Hoon Joo, MD  
30

31  
32 Department of Otolaryngology, Head and Neck Surgery,  
33

34 Bucheon St. Mary's Hospital, College of Medicine,  
35

36 The Catholic University of Korea  
37

38 2 Sosa-dong, Wonmi-gu, Bucheon,  
39

40 Kyounggi-do 420-717, Republic of Korea  
41

42 Tel: +82 32 340 7090, Fax: +82 32 340 2674, E-mail: [joodoet@catholic.ac.kr](mailto:joodoet@catholic.ac.kr)  
43  
44

45  
46  
47 Financial disclosure : none  
48

49  
50 Conflict of interest : none  
51  
52  
53  
54  
55  
56  
57  
58  
59  
60

**Abstract**

**Objective:** To investigate the relationship between bone mineral density (BMD) and hearing impairment using a nationally demonstrative sample of Korean female adults.

**Study Design:** Cross-sectional study of a national health survey.

**Methods:** Data from the 2009–2010 Korean National Health and Nutrition Examination Surveys (KNHANES) with 19,491 participants were analyzed and 8,773 of these participants were enrolled in this study. BMD was measured using dual-energy X-ray absorptiometry. Auditory functioning was evaluated by pure-tone audiometric testing according to established KNHANES protocols. We deliberated auditory impairment as pure-tone averages (PTA) at frequencies of 0.5, 1.0, 2.0, and 3.0 kHz at a threshold of  $\geq 40$  decibels hearing level (dBHL) in the auricle with better audible status.

**Results:** Among women aged 19 years and older, prevalences of bilateral hearing impairment in premenopausal and postmenopausal women were  $0.1 \pm 0.1\%$  and  $11.5 \pm 1.1\%$  (mean  $\pm$  SE), respectively. Hearing impairment was meaningfully associated with low BMD in postmenopausal women. Logistic regression models indicated that lower BMD of the total femur (OR = 0.779; 95% CI = 0.641–0.946,  $p = 0.0118$ ) and femur neck (OR = 0.746; 95% CI = 0.576–0.966,  $p = 0.0265$ ) were significantly associated with hearing impairment among postmenopausal women.

**Conclusions:** Postmenopausal Korean women with low BMD of the total femur and femoral neck showed an increased risk for developing hearing impairment. Further epidemiological and investigational studies are needed to elucidate this association.

**Keywords:** hearing impairment, bone mineral density, epidemiology

**Strengths and limitations of this study**

- We used a nation widely demonstrative, cross-sectional, civilian non-institutionalized sample of Korean adults.

- We evaluated the relationship between BMD and hearing level including various social, economic, behavioral, and health variables using a population-based database.

- We were unable to analyze temporal association between hearing impairment and BMD, which may make our results biased.

## Introduction

Osteoporosis has become a mainly healthcare problem around the world.<sup>1</sup> Osteoporosis prevalence at the total hip or hip/spine ranges from 9% to 38% in females and 1% to 8% in males after analyse data from nine industrialized nations in North America, Europe, Japan, and Australia.<sup>2</sup> It has been stated that crucial demographic alterations might occur in Asia.<sup>3</sup> The prevalence and incidence of osteoporosis are expected to increase in an ageing society.<sup>4</sup> Osteoporosis is considered when there is worsening of bone microarchitecture and reduction in bone mineral density (BMD).<sup>5</sup> Decreased BMD causes demineralization of the bone system. Deterioration of the petrous temporal bone which encases the cochlear capsule and internal auditory canal might be associated with impaired audible function.<sup>5-8</sup> Osteoporosis is characteristically accepted as an important health care concern in females. However, it is now progressively regarded as a significant health care issue in males as well.

Adult-onset hearing impairment is another important public concern of disability among adults in high-income nations.<sup>9</sup> The total prevalence of audiometric hearing loss among persons with bilateral hearing loss aged 12 years and older in the United States was 12.7% (30.0 million) between 2001 and 2008. This was increased to 20.3% (48.1 million) when individuals with unilateral hearing loss were included.<sup>10</sup> Hearing impairment can isolate individuals from their social environment, impair psychosocial functioning, impair cognitive skills, increase individual emotional stress, and have negative health effects at individual and family levels.<sup>11</sup> Moreover, it has been recently described that hearing impairment is associated with a menace of depression among adults, particularly women.<sup>12</sup>

Several studies have evaluated the relationship between BMD and audible sensitivity. Clark et al. have reported that 369 white female aged 60 to 85 years with femoral neck

1  
2  
3  
4 skeletal mass values below the mean value of 0.696 g/cm<sup>2</sup> have a 1.9-fold greater odds  
5  
6 of having a hearing loss.<sup>5</sup> In contrast, Helzner et al. have shown no association between  
7  
8 hearing and any of bone measurements in white or black females.<sup>13</sup> There are  
9  
10 discrepancies and limitations in previous studies on associations between BMD and  
11  
12 audible impairment, including differences in race, study design, and measurements of  
13  
14 hearing impairment<sup>14</sup>. Thus, the objective of this study was to assess the relationship  
15  
16 between BMD and hearing impairment in a representative example of Korean adult  
17  
18 populations. Understanding and identifying the association between BMD and hearing  
19  
20 impairment in an extensive research could provide important information for patient  
21  
22 management and reduction of social burden for these conditions.  
23  
24

25  
26 To the best of our knowledge, that has been no report of a nationwide study on  
27  
28 hearing impairment diagnosed by otolaryngology doctors or the relationship between  
29  
30 BMD and hearing impairment in Asian females. Thus, we investigated the association  
31  
32 between BMD and hearing impairment in a large representative population example  
33  
34 from the Korean National Health and Nutrition Examination Surveys (KNHANES).  
35  
36  
37

## 38 **Methods**

### 39 **Study Population**

40  
41  
42 This study was based on data collected from the 2009–2010 KNHANES study  
43  
44 conducted by the Division of Chronic Disease Surveillance under the supervision of the  
45  
46 Korea's Centers for Disease Control and Prevention since 1998. The KNHANES is a  
47  
48 nationwide survey designed to accurately assess health and nutritional status at national  
49  
50 level. A field survey team including an otolaryngologist, an ophthalmologist, and nurses  
51  
52 traveled with a mobile examination unit. They performed interviews and physical  
53  
54 examinations. The survey consisted of a health interview, a nutritional survey, and a  
55  
56  
57  
58  
59  
60

1  
2  
3  
4 health examination survey. The survey collected data via household interviews and by  
5  
6 direct standardized physical examinations conducted in specially equipped mobile  
7  
8 examination centers. The KNHANES methodology has been described in detail  
9  
10 previously.<sup>15,16</sup> Further details are listed in “The 5th KNHANES Sample Design” and  
11  
12 reports, made accessible on the KNHANES website  
13  
14 <https://knhanes.cdc.go.kr/knhanes/index.do>. The KNHANES annual reports, user  
15  
16 manuals and instructions, and raw data are available upon request.  
17

18  
19 This study was a retrospective cross-sectional analysis of a nationwide health survey.  
20  
21 We hypothesized that auditory impairment was positively correlated with low BMD in  
22  
23 Korean population before looking at the data. During 2009–2010, there were 19,491  
24  
25 KNHANES participants. Of these, 10,718 were excluded from the analysis because of  
26  
27 at least one of the following reasons: younger than 19 years; did not undergo  
28  
29 ontological, BMD, or 25 hydroxy vitamin D test; or with missing data for the lifestyle  
30  
31 questionnaire. The final sample included 8,773 adults aged 19 years, including 3,885  
32  
33 males, 2,622 premenopausal women, and 2,266 postmenopausal women. Written  
34  
35 informed consent was obtained from all participants prior to the survey. Approval for  
36  
37 this study was obtained from the Institutional Review Board of the Catholic University  
38  
39 of Korea, Seoul, Korea (IRB no. HC14EISE0097; Bucheon, Korea).  
40  
41  
42  
43  
44

#### 45 **Bone Mineral Density and Laboratory Measurements**

46  
47 Participants wore light clothes without shoes or jewelry that could interfere with BMD  
48  
49 measurements. BMD was checked by trained technicians at mobile examination centers.  
50  
51 BMD values of the lumbar spine (L1–L4), femoral neck, and total femur were  
52  
53 measured using dual-energy X-ray absorptiometry (DXA) and a Discovery fan-beam  
54  
55 densitometer (Hologic, Bedford, MA, USA) with Hologic Discovery software (ver. 3.1).  
56  
57  
58  
59



1  
2  
3  
4 To guarantee DXA quality control, daily programmed calibration was done according  
5  
6 to the manufacturer's directions to keep a precision standard of 1.5% for total hip  
7  
8 measurements.  
9

10 Standing height was calculated with the subject looking forward, barefoot, feet  
11  
12 together, arms at sides with heels, buttocks, and upper back in contact with the wall.  
13  
14 Height was measured in centimeters to one decimal point using a calibrated stadiometer  
15  
16 (SECA 225 stadiometer, SECA, Hamburg, Germany). Waist circumference (WC) was  
17  
18 measured at the level of the midpoint between the iliac crest and the costal margin at the  
19  
20 end of a normal expiration to the nearest 0.1 cm. Weight was measured using a mobile  
21  
22 scale (GL-6000-20; Cas Korea, Seoul, Korea) in kilograms to one decimal point. Body  
23  
24 mass index (BMI) was calculated as weight (kg)/height (m<sup>2</sup>). Blood samples for  
25  
26 biochemical analyses and measurement of serum 25-hydroxyvitamin D (25(OH)D)  
27  
28 were collected from all subjects, refrigerated instantly, carried to Principal Analysis  
29  
30 Foundation (Seoul, Korea), and scrutinized within 24 h.  
31  
32  
33  
34  
35

### 36 **Audiometric Measurements**

37  
38 Pure-tone audiometric test was done with a SA 203 audiometer (Entomed; Malmö,  
39  
40 Sweden). Pure-tone audiometry is a behavioral assessment used to calculate audible  
41  
42 sensitivity. 'Audiometric' means 'measuring the hearing level'. Examination was  
43  
44 accompanied in a soundproof booth inside a transportable bus set aside for the  
45  
46 KNHANES. Otolaryngologists skilled to work on the audiometer provided directions to  
47  
48 subjects regarding the automated hearing test. Records were attained. All audiometric  
49  
50 analyses were performed under the supervision of an otolaryngologist. Solely  
51  
52 thresholds of air conduction were investigated. Air conduction assessed the whole ear  
53  
54 system -- outer, middle, and inner ear. Threshold meant the lowest decibel hearing level  
55  
56  
57  
58  
59

1  
2  
3  
4 at which responses occurred in at least one half of a series of ascending trials. The  
5  
6 minimum number of responses needed to determine the threshold of hearing was two  
7  
8 responses out of three presentations at a single level. Over-Ear headphones were used in  
9  
10 the soundproof booth. Supra-auricular' was defined as 'situated above the ear coverts'.  
11  
12 Automated analysis was platformed according to a modified Hughson–Westlake  
13  
14 procedure using a single pure tone of 1–2 s. The lowest level at which the participant  
15  
16 answered to 50% of the pure tone was established as the threshold. Test–retest  
17  
18 reliability and validity of the automated audible examination relating to air-conducted  
19  
20 pure-tone provocations were effective and equivalent to those attained in the manual  
21  
22 pure-tone acoustic assessment.<sup>17,18</sup> Subjects answered by pressing a button when they  
23  
24 caught a tone. Outcomes were documented spontaneously. Frequency ranges tested  
25  
26 were 0.5, 1.0, 2.0, 3.0, 4.0, and 6.0 kHz. We described hearing impairment as pure-tone  
27  
28 averages (PTA) of frequencies at 0.5, 1.0, 2.0, and 3.0 kHz at a threshold of  $\geq 40$   
29  
30 decibel hearing level (dBHL) in the ear with better hearing.<sup>19</sup>  
31  
32  
33

34 Participants were requested about their experience of tinnitus: 'Within the past year,  
35  
36 have you ever heard a sound (buzzing, hissing, ringing, humming, roaring, machinery  
37  
38 noise) come from your ear?' Investigators were instructed to record 'yes' if an  
39  
40 applicant stated perceiving an odd or unusual sound at any time in the past year.  
41  
42 Subjects who responded certainly to this question were then asked about the annoyance  
43  
44 in their lives using the following question: 'How annoying is this sound in daily life?'  
45  
46 (not annoying/annoying/severely annoying, and causes sleep problems). Participants  
47  
48 were deliberated to have tinnitus if the severity of tinnitus was annoying or severely  
49  
50 annoying.  
51  
52  
53  
54

## 55 **Lifestyle Habits**

1  
2  
3  
4 Data on medical histories and lifestyle habits were collected using self-report  
5  
6 questionnaires. Participants were categorized into three groups according to smoking  
7  
8 history: current smoker, ex-smoker, and nonsmoker. Subjects who drank more than 30  
9  
10 g of ethanol/day were designated as drinkers. Regular exercise was defined as strenuous  
11  
12 physical activity performed for at least 20 min at a time at least three times per week.  
13  
14 Subjects stated their levels of stress as none, mild, moderate, or severe.  
15  
16  
17  
18

### 19 **Statistical Analysis**

20  
21 All statistical analyses were performed using SAS version 9.3 (SAS Institute, Cary, NC,  
22  
23 USA) to reveal the complex sampling design and sampling weights of the KNHANES  
24  
25 and to provide nationwide demonstrative prevalence assessments. The prevalence and  
26  
27 95% confidence intervals (CIs) for BMD were calculated. In univariate analysis, Rao-  
28  
29 Scott  $\chi^2$  test (using PROC SURVEYFREQ in SAS) and logistic regression analysis  
30  
31 (using PROC SURVEYLOGISTIC in SAS) were used to examine the relationship  
32  
33 between hearing impairment and risk factors in a complex sampling design. Subjects'  
34  
35 characteristics were expressed as means and standard errors for continuous variables or  
36  
37 as percentages for categorical variables. To examine the association between hearing  
38  
39 level and BMD, participants were divided into quartiles based on levels of BMD (Q1–  
40  
41 Q4). Simple and multiple linear regression analyses were performed to investigate the  
42  
43 relationship between hearing impairment and BMD.  
44  
45  
46

47 We first adjusted for age and BMI (model 1). We then adjusted for variables in  
48  
49 model 1 as well as smoking status, ethanol intake, exercise, education, and income  
50  
51 (model 2). Model 3 was adjusted for variables in model 2 as well as vitamin D, stress,  
52  
53 and tinnitus. P-values were two-tailed. Statistical significance was considered at  $P <$   
54  
55 0.05.  
56  
57  
58  
59  
60

## Results

Of 4,888 female participants aged  $\geq 19$  years, 2,622 and 2,266 were premenopausal and postmenopausal, respectively. Table 1 shows baseline features of men, premenopausal women, and postmenopausal women. Mean ages of men, premenopausal women, and postmenopausal women were  $43.9 \pm 0.3$ ,  $35.3 \pm 0.2$ , and  $62.7 \pm 0.3$  years, respectively. The prevalence of bilateral hearing impairment in postmenopausal women was  $11.5 \pm 1.1\%$  (mean  $\pm$  SE). Postmenopausal women had lower percentages of ethanol drinkers but higher percentages of those with low income compared with men and premenopausal women. Mean values of BMI, WC, and vitamin D level were lower in premenopausal females than those in postmenopausal females. BMDs of the lumbar spine, total femur, and femoral neck were lower in postmenopausal females than those in men or premenopausal females. Subject characteristics according to bilateral hearing impairment are shown in Table 2.

After categorizing subjects into four groups based on the percentage of BMD (quartile 1, with the highest, to quartile 4, with the lowest), we performed analysis of covariance (ANCOVA) to investigate hearing level according to BMD quartile at various skeletal sites after adjusting for confounding variables such as age, BMI, smoking status, ethanol consumption, regular exercise, educational level, income, 25-hydroxy vitamin D, stress level, and tinnitus. Lumbar skeleton, total femur skeleton, and femoral neck BMD in postmenopausal women showed significantly decreased tendencies in hearing level as BMD decreased in quartiles ( $P < 0.0001$ ; Fig. 1). However, BMDs at the lumbar skeleton ( $P = 0.570$ ), total femur skeleton ( $P = 0.358$ ), or femur neck ( $P = 0.268$ ) of premenopausal women showed no statistically significantly association with hearing level. Those of men showed no statistically

1  
2  
3  
4 significantly association with hearing level either.

5  
6 Table 3 demonstrates the association between hearing impairment and BMD using  
7  
8 logistic regression models. In the final regression model for hearing impairment, BMDs  
9  
10 of the total femur (OR = 0.779; 95% CI = 0.641–0.946) and femoral neck (OR = 0.746;  
11  
12 95% CI = 0.576–0.966) were significantly associated with hearing impairment in  
13  
14 postmenopausal women after adjusting for age, BMI, smoking status, ethanol intake,  
15  
16 regular exercise, educational level, income, vitamin D, stress level, and tinnitus (Model  
17  
18 3). BMD at the lumbar spine (OR = 0.525; 95% CI = 0.279–0.989) was also  
19  
20 significantly associated with hearing impairment in premenopausal females. However,  
21  
22 BMD at the total femur or femoral neck in men or premenopausal women did not show  
23  
24 any significant correlation with hearing impairment. To ascertain the relations between  
25  
26 hearing impairment and BMD at several skeletal sites, simple linear logistic regression  
27  
28 analysis was performed after adjusting for age, BMI, smoking status, ethanol intake,  
29  
30 regular exercise, educational level, income, 25-hydroxyvitamin D, stress level, and  
31  
32 tinnitus. There was no statistically significant association between hearing impairment  
33  
34 and BMD at any parts of skeletal sites in male, premenopausal, or postmenopausal  
35  
36 females (Table 4).  
37  
38  
39  
40  
41  
42  
43

### 44 **Discussion**

45 The main objective of this research was to examine the association between BMD and  
46  
47 hearing impairment using a nationwide representative example of South Korean  
48  
49 population. Our findings indicated that low BMDs of the total femur skeleton and femur  
50  
51 neck were associated with an increased risk for impairment of hearing function in  
52  
53 postmenopausal females.  
54  
55  
56  
57  
58  
59  
60

1  
2  
3  
4 Some previous studies have reported that reduced BMD is closely associated with  
5 hearing impairment.<sup>5,13</sup> The bone mass of the femoral neck is associated with hearing  
6 loss in a population of rural females aged 60–85 years.<sup>5</sup> Another research has enrolled  
7 2052 older adults aged 73–84 years using a randomized method.<sup>13</sup> The population was  
8 composed of white males (32.2%), white females (30.8%), black males (15.1%), and  
9 black females (22.0%). Their results showed that the BMD of the total hip was not  
10 associated with hearing loss in white males, white females, or black females. However,  
11 it was associated with hearing loss in black males.<sup>13</sup> Unlike our results, that study only  
12 checked BMD of the total hip. Age range and race of the sample also differed from  
13 those of ours. However, their study did show that there were differences in hearing  
14 impairment by race and sex.  
15  
16  
17  
18  
19  
20  
21  
22  
23  
24  
25  
26

27 The mechanism of hearing impairment in postmenopausal women with lower BMD  
28 might involve demineralization of cochlear capsule of the temporal bone which could  
29 lead to loss of the delicate stereocilia of the cochlear.<sup>14</sup> The cochlear capsule is situated  
30 in the petrous portion of the temporal bone. This portion is primarily composed of  
31 cancellous bone components.<sup>20</sup> The demineralization of the cochlear capsule has been  
32 related to auditory loss in subjects with skeletal diseases, such as Paget's disease,  
33 otosclerosis, and osteogenesis imperfecta.<sup>7,14,21</sup> Deteriorated auditory function at a  
34 specific frequency has been associated with lower BMD within the cochlear capsule.<sup>22</sup>  
35 Demineralization of the petrous temporal bone affects the encasing compartment of the  
36 cochlear capsule. Spiral ligament hyalinization might be affected by toxic effects of  
37 enzymes released from otospongiotic foci, thus leading to hearing impairment.<sup>21</sup> Lower  
38 BMD of the petrous portion of the temporal bone can affect the dissipation of cochlear  
39 stereocilia. It could be a cause of hearing loss in subjects with sensorineural hearing  
40 loss.<sup>22</sup> This phenomenon supports the occurrence of age-related sensorineural loss and  
41  
42  
43  
44  
45  
46  
47  
48  
49  
50  
51  
52  
53  
54  
55  
56  
57  
58  
59  
60

1  
2  
3  
4 the fact that the severity of cochlear hearing loss is influenced by the extent of cochlear  
5 demineralization.<sup>5,23</sup>  
6  
7

8 Our study showed that differences related to menopause might contribute to the  
9 relationship between bone mass and hearing impairment. It has been reported that  
10 estrogen can exert a positive effect on hearing among older women.<sup>24</sup> Furthermore,  
11 estradiol treatment might have a positive effect on ionic homeostasis of the inner ear  
12 and offer protection of activated intermediated filaments.<sup>25</sup> Thus, estrogen might  
13 contribute to differences in hearing impairment among women such as those between  
14 premenopausal and postmenopausal women.<sup>26,27</sup> Estrogen may play an important role in  
15 the maintenance or repair of sensory epithelia of the inner ear. It may act as an auditory  
16 protectant.<sup>28-30</sup>  
17  
18  
19  
20  
21  
22  
23  
24  
25  
26

27 Screening for hearing impairment is important. Patients, clinicians, family, and  
28 healthcare staff often do not identify hearing loss exactly in its initial period. This  
29 condition might have been undertreated.<sup>31</sup> In addition, hearing impairment may favor  
30 the development of dementia and intellectual dysfunction in grown-ups aged 65 years  
31 and older.<sup>32</sup> Hearing impairment is positively correlated with depression among US  
32 grown-ups of all ages, particularly among females and those younger than 70 years.<sup>12</sup>  
33  
34 Therefore, screening tests of hearing based on risk factors are essential. Physicians  
35 should be aware of the likelihood of hearing damage in postmenopausal women.  
36  
37  
38  
39  
40  
41  
42  
43  
44

45 Our study has several limitations. First, we did not directly quantify BMD of the  
46 cochlear capsule of the temporal bone. There were no data on any association between  
47 BMD in the petrous site of the temporal bone and that of the appendicular skeleton.  
48  
49 However, previous research has indicated that osteoporosis can affect skull skeletons.  
50  
51 Patients with hyperthyroid-related osteoporosis suffered from decreased skull bone  
52 density. Demineralization of the petrous site of the temporal bone has been observed in  
53  
54  
55  
56  
57  
58  
59  
60

1  
2  
3  
4 patients with severe osteoporosis.<sup>33,34</sup> It has been reported that high-resolution  
5  
6 computed tomography is useful for checking the association between BMD of the  
7  
8 petrous portion of the temporal bone and hearing loss.<sup>35</sup> Under ideal conditions, BMD  
9  
10 of the petrous portion of the temporal bone should be measured. However, there is no  
11  
12 feasible or accurate method for measuring BMD in large populations. Second, we were  
13  
14 unable to evaluate the temporal relation between hearing impairment and BMD.  
15  
16 Acceptable evaluation of the presence of hearing impairment is limited for extended  
17  
18 periods. Therefore, we were unable to investigate hearing variabilities in these  
19  
20 populations. The final limitation of this study was the absence of bone-conduction pure  
21  
22 tone testing. The audiometric assessment could not entirely exclude conductive hearing  
23  
24 losses. Despite these limitations, no previous study has evaluated the association  
25  
26 between hearing impairment and low BMD in a representative general female  
27  
28 population in Asia. Additionally, these results might be reliable because data used in  
29  
30 this study were obtained from a government-sponsored survey of the national  
31  
32 population of South Korea, qualified by DXA, validated by audiometry tests, and  
33  
34 verified by otolaryngologists.  
35  
36  
37  
38  
39

### 40 **Conclusion**

41  
42 Low BMDs in the total femur and femoral neck were associated with impaired  
43  
44 hearing status in postmenopausal women. Future cohort studies with larger sample sizes  
45  
46 and controls for possible confounders are needed to clarify the association between  
47  
48 hearing impairment and BMD in postmenopausal women.  
49  
50  
51  
52  
53  
54  
55  
56  
57  
58  
59  
60



## Acknowledgements

We are grateful to 150 medical residents of the Otorhinolaryngology Departments of 47 training hospitals in South Korea who are members of the Division of Chronic Disease Surveillance of Korea's Centers for Disease Control & Prevention for their participation in this survey and for their dedicated work.

Contributions: SSL wrote the first draft of the manuscript and took part in data analyses. KDH performed statistical analyses. YHJ designed the study and critically revised the manuscript for important intellectual content.

Competing interests: None declared.

Funding: This study was supported by a grant (HC16C2285) from the Korean Health Technology and Research and Development project funded by the Ministry of Health and Welfare, Republic of Korea.

Data sharing statement: The KNHANES methodology has been described in detail previously. Further details are listed in "The 5th KNHANES Sample Design" and reports accessible at the KNHANES website (<https://knhanes.cdc.go.kr/knhanes/index.do>). KNHANES annual reports, user manuals and instructions, and raw data are available upon request.

## References

1. World Health Organization. Prevention and management of osteoporosis. World Health Organ. Tech. Rep. Ser. 2003;921:1–164, back cover.
2. Wade SW, Strader C, Fitzpatrick LA, Anthony MS, O'Malley CD. Estimating prevalence of osteoporosis: examples from industrialized countries. *Arch Osteoporos*. 2014;9:182.
3. Gullberg B, Johnell O, Kanis JA. World-wide projections for hip fracture. *Osteoporos Int*. 1997;7:407–413.
4. Cole ZA, Dennison EM, Cooper C. Osteoporosis epidemiology update. *Curr Rheumatol Rep*. 2008;10:92–96.
5. Clark K, Sowers MR, Wallace RB, Jannausch ML, Lemke J, Anderson CV. Age-related hearing loss and bone mass in a population of rural women aged 60 to 85 years. *Ann. Epidemiol*. 1995;5:8–14.
6. Petasnick JP. Tomography of the temporal bone in Paget's disease. *Am. J. Roentgenol. Radium Ther. Nucl. Med*. 1969;105:838–843.
7. Huizing EH, de Groot JA. Densitometry of the cochlear capsule and correlation between bone density loss and bone conduction hearing loss in otosclerosis. *Acta Otolaryngologica*. 1987;103:464–468.
8. Chakeres DW, Weider DJ. Computed tomography of the ossicles. *Neuroradiology*. 1985;27:99–107.
9. World Health Organization. The Global Burden of Disease: 2004 Update. 2008; [http://www.who.int/healthinfo/global\\_burden\\_disease/2004\\_report\\_update/en/](http://www.who.int/healthinfo/global_burden_disease/2004_report_update/en/).
10. Lin FR, Niparko JK, Ferrucci L. Hearing loss prevalence in the United States. *Arch Intern Med*. 2011;171:1851–1852.
11. Hogan A, O'Loughlin K, Miller P, Kendig H. The health impact of a hearing

1  
2  
3  
4 disability on older people in Australia. *J Aging Health*. 2009;21:1098–1111.

5  
6 12. Li CM, Zhang X, Hoffman HJ, Cotch MF, Themann CL, Wilson MR. Hearing  
7  
8 impairment associated with depression in US adults, National Health and Nutrition  
9  
10 Examination Survey 2005–2010. *JAMA Otolaryngol Head Neck Surg*. 2014;140:293–  
11  
12 302.

13  
14 13. Helzner EP, Cauley JA, Pratt SR, et al. Race and sex differences in age-related  
15  
16 hearing loss: the Health, Aging and Body Composition Study. *J Am Geriatr Soc*.  
17  
18 2005;53:2119–2127.

19  
20 14. Helzner EP, Cauley JA, Pratt SR, et al. Hearing sensitivity and bone mineral  
21  
22 density in older adults: the Health, Aging and Body Composition Study. *Osteoporos. Int*.  
23  
24 2005;16:1675–1682.

25  
26 15. Park SH, Lee KS, Park HY. Dietary carbohydrate intake is associated with  
27  
28 cardiovascular disease risk in Korean: analysis of the third Korea National Health and  
29  
30 Nutrition Examination Survey (KNHANES III). *Int. J. Cardiol*. 2010;139:234–240.

31  
32 16. Park HA. The Korea National Health and Nutrition Examination Survey as a  
33  
34 primary data source. *Korean J Fam Med*. 2013;34:79.

35  
36 17. Swanepoel de W, Mngemane S, Molemong S, Mkwanazi H, Tutshini S.  
37  
38 Hearing assessment-reliability, accuracy, and efficiency of automated audiometry.  
39  
40 *Telemed J E Health*. 2010;16:557–563.

41  
42 18. Mahomed F, Swanepoel de W, Eikelboom RH, Soer M. Validity of automated  
43  
44 threshold audiometry: a systematic review and meta-analysis. *Ear and Hearing*.  
45  
46 2013;34:745–752.

47  
48 19. World Health Organization. Millions of people in the world have hearing loss  
49  
50 that can be treated or prevented: 2013 update. WHO/NMH/PBD 2013.04;  
51  
52 <http://www.who.int/pbd/deafness/news/Millionslivewithhearingloss.pdf>  
53  
54  
55

- 1  
2  
3  
4 20. Swinnen FK, De Leenheer EM, Goemaere S, Cremers CW, Coucke PJ, Dhooge  
5  
6 IJ. Association between bone mineral density and hearing loss in osteogenesis  
7  
8 imperfecta. *Laryngoscope*. 2012;122:401–408.  
9
- 10 21. Guneri EA, Ada E, Ceryan K, Guneri A. High-resolution computed  
11  
12 tomographic evaluation of the cochlear capsule in otosclerosis: relationship between  
13  
14 densitometry and sensorineural hearing loss. *The Annals of Otology, Rhinology, and*  
15  
16 *Laryngology*. 1996;105:659–664.  
17
- 18 22. Swartz JD, Mandell DW, Berman SE, Wolfson RJ, Marlowe FI, Popky GL.  
19  
20 Cochlear otosclerosis (otospongiosis): CT analysis with audiometric correlation.  
21  
22 *Radiology*. 1985;155:147–150.  
23
- 24 23. Mendy A, Vieira ER, Albatineh AN, Nnadi AK, Lowry D, Gasana J. Low bone  
25  
26 mineral density is associated with balance and hearing impairments. *Ann. Epidemiol.*  
27  
28 2014;24:58–62.  
29
- 30 24. Frisina RD, Frisina DR. Physiological and neurobiological bases of age-related  
31  
32 hearing loss: biotherapeutic implications. *American Journal of Audiology*.  
33  
34 2013;22:299–302.  
35
- 36 25. Horner KC, Troadec JD, Dallaporta M, Pio J. Effect of chronic estradiol  
37  
38 administration on vimentin and GFAP immunohistochemistry within the inner ear.  
39  
40 *Neurobiol Dis*. 2009;35:201–208.  
41  
42
- 43 26. Gordon-Salant S. Hearing loss and aging: new research findings and clinical  
44  
45 implications. *Journal of Rehabilitation Research and Development*. 2005;42:9–24.  
46  
47
- 48 27. Pearson JD, Morrell CH, Gordon-Salant S, et al. Gender differences in a  
49  
50 longitudinal study of age-associated hearing loss. *The Journal of the Acoustical Society*  
51  
52 *of America*. 1995;97:1196–1205.  
53  
54
- 55 28. Sajan SA, Warchol ME, Lovett M. Toward a systems biology of mouse inner  
56  
57  
58  
59

ear organogenesis: gene expression pathways, patterns and network analysis. *Genetics*. 2007;177:631–653.

29. McCullar JS, Oesterle EC. Cellular targets of estrogen signaling in regeneration of inner ear sensory epithelia. *Hearing Research*. 2009;252:61–70.

30. Nolan LS, Maier H, Hermans-Borgmeyer I, et al. Estrogen-related receptor gamma and hearing function: evidence of a role in humans and mice. *Neurobiology of Aging*. 2013;34:2077 e2071–2079.

31. Pacala J, Yueh B. Hearing deficits in the older patient: "I didn't notice anything". *JAMA*. 2012;307:1185–1194.

32. Gurgel RK, Ward PD, Schwartz S, Norton MC, Foster NL, Tschanz JT. Relationship of hearing loss and dementia: a prospective, population-based study. *Otology & Neurotology: Official Publication of the American Otological Society, American Neurotology Society [and] European Academy of Otology and Neurotology*. 2014;35:775–781.

33. Meunier P, Bianchi G, Edouard C, Bernard J, Courpron P, Vignon G. Bony manifestations of thyrotoxicosis. *Orthop Clin North Am*. 1972;3:745–774.

34. Khan A, Lore JM, Jr. Osteoporosis relative to head and neck. *J Med*. 1984;15:279–284.

35. Güneri EA, Ada E, Ceryan K, Güneri A. High-resolution computed tomographic evaluation of the cochlear capsule in otosclerosis: relationship between densitometry and sensorineural hearing loss. *The Annals of Otology, Rhinology & Laryngology*. 1996;105:659–664.

**TABLE 1. SUBJECT CHARACTERISTICS**

|                                          | Bilateral Hearing Impairment |                 | p-value |
|------------------------------------------|------------------------------|-----------------|---------|
|                                          | No<br>(n= 8214)              | Yes<br>(n= 559) |         |
| Age (years)                              | 43.6 ±0.3                    | 69.9±0.6        | <0.0001 |
| Average hearing level (dB)               | 10.5±0.2                     | 57.1±1.5        | <0.0001 |
| Smoking - Current smoker (%)             | 26.3±1.2                     | 19.5±4.5        | 0.0086  |
| Drinking - Heavy drinker (%)             | 10.3±0.9                     | 6.7±2.6         | 0.0311  |
| Routine exercise (%)                     | 24.9±1.4                     | 18.9±3.8        | 0.0052  |
| Body mass index (kg/m <sup>2</sup> )     | 23.7±0.0                     | 23.8±0.2        | 0.3586  |
| Waist circumference (cm)                 | 80.7±0.2                     | 83.7±0.5        | <0.0001 |
| Education - ≥High school (%)             | 73.0±1.8                     | 14.6±3.8        | <0.0001 |
| Residential area - Urban (%)             | 81.1±4.5                     | 67.7±8.6        | <0.0001 |
| Income - Lower quartile (%)              | 14.9±1.5                     | 50.0±4.8        | <0.0001 |
| Stress – Moderate to severe (%)          | 30.4±1.3                     | 25.8±5.1        | 0.0937  |
| 25-Hydroxyvitamin D (ng/ml)              | 18.5±0.2                     | 20.2±0.6        | 0.0013  |
| BMD of lumbar spine (g/cm <sup>2</sup> ) | 0.947±0.002                  | 0.841±0.008     | <0.0001 |
| BMD of total femur (g/cm <sup>2</sup> )  | 0.929±0.002                  | 0.799±0.008     | <0.0001 |
| BMD of femoral neck (g/cm <sup>2</sup> ) | 0.778±0.002                  | 0.629±0.008     | <0.0001 |

\* P < 0.05 was considered statistically significant.

**TABLE 2. SUBJECT CHARACTERISTICS ACCORDING TO BILATERAL HEARING IMPAIRMENT**

|                                          | Men<br>(n=3885) | Premenopausal<br>women (n=2622) | Postmenopausal<br>women (n=2266) | p-value  |
|------------------------------------------|-----------------|---------------------------------|----------------------------------|----------|
| Age (years)                              | 43.9±0.3        | 35.3±0.2                        | 62.7±0.3                         | <0.0001* |
| Average hearing level (dB)               | 19.1±0.4        | 12.3±0.4                        | 30.6±0.8                         | <0.0001* |
| Smoking - Current smoker (%)             | 45.4±1.0        | 7.1±0.7                         | 4.6±0.6                          | <0.0001* |
| Drinking - Heavy drinker (%)             | 18.2±0.8        | 2.6±0.4                         | 0.9±0.2                          | <0.0001* |
| Routine exercise (%)                     | 27.3±0.8        | 21.3±1.0                        | 22.6±1.3                         | <0.0001* |
| Body mass index (kg/m <sup>2</sup> )     | 24.1±0.1        | 22.6±0.1                        | 24.3±0.1                         | <0.0001* |
| Waist circumference (cm)                 | 84.0±0.2        | 74.8±0.3                        | 82.3±0.3                         | <0.0001* |
| Education - ≥High school (%)             | 77.0±0.9        | 89.7±0.7                        | 20.7±1.3                         | <0.0001* |
| Residential area - Urban (%)             | 80.1±2.3        | 85.8±2.0                        | 73.2±2.9                         | <0.0001* |
| Income - Lower quartile (%)              | 14.5±0.8        | 9.6±0.8                         | 33.0±1.4                         | <0.0001* |
| Stress – Moderate to severe (%)          | 27.4±0.9        | 35.2±1.1                        | 29.8±1.3                         | <0.0001* |
| 25-Hydroxyvitamin D (ng/ml)              | 19.8±0.2        | 16.4±0.2                        | 19.0±0.3                         | <0.0001* |
| BMD of lumbar spine (g/cm <sup>2</sup> ) | 0.971±0.003     | 0.977±0.003                     | 0.807±0.004                      | <0.0001* |
| BMD of total femur (g/cm <sup>2</sup> )  | 0.986±0.003     | 0.905±0.003                     | 0.782±0.003                      | <0.0001* |
| BMD of femoral neck (g/cm <sup>2</sup> ) | 0.829±0.003     | 0.765±0.003                     | 0.626±0.003                      | <0.0001* |
| Hearing loss (%)                         | 4.6±0.4         | 0.2±0.1                         | 11.5±1.1                         | <0.0001* |

Data are presented as mean ± SE (standard error)

TABLE 3. MULTIVARIABLE LOGISTIC REGRESSION ANALYSIS OF ADJUSTED ODD RATIOS (ORs) AND 95% CONFIDENCE INTERVALS (CIs) TO DETERMINE THE EFFECT OF BONE MINERAL DENSITY ON HEARING IMPAIRMENT

|              | Men                | Premenopausal women | Postmenopausal women |
|--------------|--------------------|---------------------|----------------------|
| Lumbar spine |                    |                     |                      |
| Model 1      | 0.999(0.892-1.118) | 0.486(0.276-0.856)  | 0.921(0.812-1.044)   |
| Model 2      | 1.052(0.939-1.178) | 0.528(0.273-1.020)  | 0.966(0.849-1.098)   |
| Model 3      | 1.058(0.937-1.195) | 0.525(0.279-0.989)  | 0.960(0.835-1.103)   |
| Total femur  |                    |                     |                      |
| Model 1      | 0.948(0.821-1.095) | 0.683(0.323-1.444)  | 0.804(0.673-0.959)   |
| Model 2      | 0.985(0.851-1.140) | 0.756(0.348-1.640)  | 0.820(0.686-0.981)   |
| Model 3      | 1.009(0.855-1.190) | 0.758(0.338-1.703)  | 0.779(0.641-0.946)   |
| Femoral neck |                    |                     |                      |
| Model 1      | 0.874(0.727-1.050) | 0.878(0.412-1.868)  | 0.760(0.608-0.950)   |
| Model 2      | 0.914(0.761-1.099) | 0.970(0.432-2.180)  | 0.783(0.623-0.984)   |
| Model 3      | 0.919(0.747-1.130) | 0.953(0.400-2.272)  | 0.746(0.576-0.966)   |

Model 1 is adjusted for age and body mass index.

Model 2 is adjusted for age, body mass index, smoking status, ethanol intake, regular exercise, educational level, and income.

Model 3 is adjusted for age, body mass index, smoking status, ethanol intake, regular exercise, educational level, income, 25-hydroxyvitamin D, stress level, and tinnitus.



**TABLE 4. MULTIVARIABLE LOGISTIC REGRESSION ANALYSIS IN BONE MINERAL DENSITY**

|              | Men     |        |         | Premenopausal women |        |         | Postmenopausal women |        |         |
|--------------|---------|--------|---------|---------------------|--------|---------|----------------------|--------|---------|
|              | Beta    | SE     | p-value | Beta                | SE     | p-value | Beta                 | SE     | p-value |
| Lumbar spine |         |        |         |                     |        |         |                      |        |         |
| Model 1      | -0.2899 | 0.2570 | 0.2604  | -0.1820             | 0.1338 | 0.1753  | -0.0778              | 0.1560 | 0.6186  |
| Model 2      | -0.0194 | 0.2472 | 0.9375  | -0.1244             | 0.1320 | 0.3471  | 0.1261               | 0.1449 | 0.3847  |
| Model 3      | 0.0777  | 0.2517 | 0.7578  | -0.1400             | 0.1365 | 0.3063  | 0.1055               | 0.1482 | 0.4772  |
| Total femur  |         |        |         |                     |        |         |                      |        |         |
| Model 1      | -1.1271 | 0.3862 | 0.0038  | 0.0260              | 0.1426 | 0.8553  | -0.2160              | 0.1653 | 0.1924  |
| Model 2      | -1.0141 | 0.3913 | 0.0101  | 0.0034              | 0.1454 | 0.8118  | -0.0549              | 0.1586 | 0.7296  |
| Model 3      | -0.8842 | 0.3892 | 0.0240  | 0.0266              | 0.1511 | 0.8609  | -0.0038              | 0.1690 | 0.8201  |
| Femoral neck |         |        |         |                     |        |         |                      |        |         |
| Model 1      | -0.8639 | 0.4739 | 0.0695  | 0.1211              | 0.1328 | 0.3625  | -0.0713              | 0.1646 | 0.6650  |
| Model 2      | -0.6742 | 0.4917 | 0.1716  | 0.1004              | 0.1335 | 0.4528  | 0.0031               | 0.1565 | 0.8409  |
| Model 3      | -0.5278 | 0.4737 | 0.2663  | 0.0847              | 0.1392 | 0.5433  | -0.0006              | 0.1648 | 0.9969  |

Model 1 is adjusted for age and body mass index.

Model 2 is adjusted for age, body mass index, smoking status, ethanol intake, regular exercise, educational level, and income.

Model 3 is adjusted for age, body mass index, smoking status, ethanol intake, regular exercise, educational level, income, 25-hydroxyvitamin D, stress level, and tinnitus.

Results are presented as an estimated beta with corresponding standard error (SE) and p-value.

**Figure legend**

**Figure 1.** Mean values of hearing level according to bone mineral density for premenopausal women (A), postmenopausal women (B), and men (C). After categorizing subjects into four groups based on BMD (quartile 1, with the highest, to quartile 4, with the lowest) in the lumbar spine, total femur, and femur neck, we found a tendency toward significantly decreased hearing as a function of quartile decreases in BMD among postmenopausal women.

\* P < 0.05 was considered statistically significant.

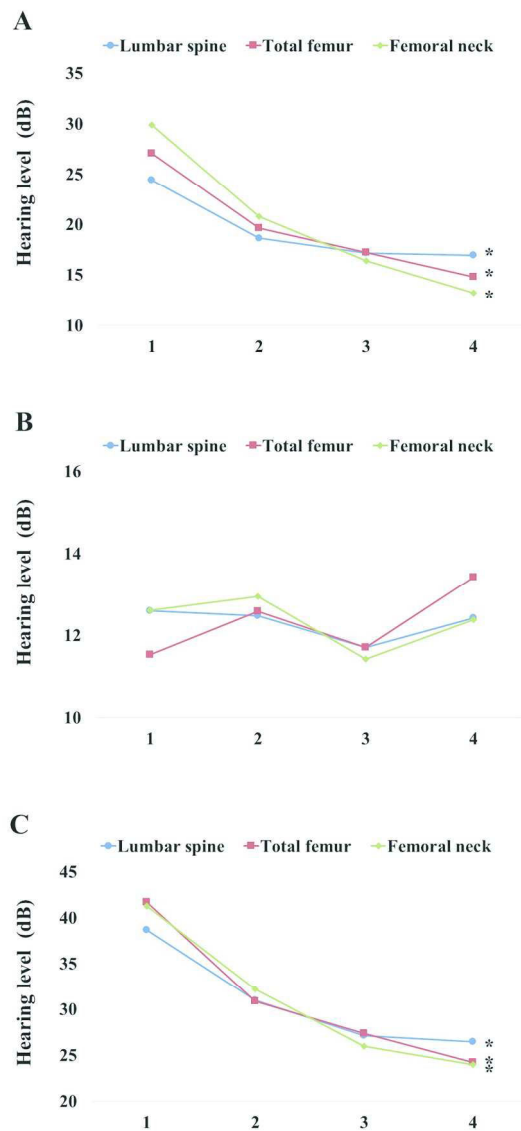

Mean values of hearing level according to bone mineral density for premenopausal (A) postmenopausal (B) women and men(C). After categorizing subjects into four groups based on BMD (quartile 1, with the highest, to quartile 4, with the lowest) in the lumbar spine, total femur, and femur neck, we found a tendency toward significantly decreased hearing as a function of quartile decreases in BMD among postmenopausal women.

\*  $P < 0.05$  was considered to be statistically significant.

112x253mm (600 x 600 DPI)

## STROBE Statement—checklist of items that should be included in reports of observational studies

|                           | Item No. | Recommendation                                                                                                                                                                                                                                                                                                                                                                                                                                            | Page No.       | Relevant text from manuscript                                                                                                     |
|---------------------------|----------|-----------------------------------------------------------------------------------------------------------------------------------------------------------------------------------------------------------------------------------------------------------------------------------------------------------------------------------------------------------------------------------------------------------------------------------------------------------|----------------|-----------------------------------------------------------------------------------------------------------------------------------|
| <b>Title and abstract</b> | 1        | (a) Indicate the study's design with a commonly used term in the title or the abstract                                                                                                                                                                                                                                                                                                                                                                    | Page 1 (title) | The Korea National Health and Nutrition Examination Survey                                                                        |
|                           |          | (b) Provide in the abstract an informative and balanced summary of what was done and what was found                                                                                                                                                                                                                                                                                                                                                       | Page 2         | Abstract                                                                                                                          |
| <b>Introduction</b>       |          |                                                                                                                                                                                                                                                                                                                                                                                                                                                           |                |                                                                                                                                   |
| Background/rationale      | 2        | Explain the scientific background and rationale for the investigation being reported                                                                                                                                                                                                                                                                                                                                                                      | Page 3         | Several studies have evaluated the association between BMD and hearing sensitivity.                                               |
| Objectives                | 3        | State specific objectives, including any prespecified hypotheses                                                                                                                                                                                                                                                                                                                                                                                          | Page 4         | We sought to evaluate the relationship between BMD and hearing impairment in a nationally representative sample of Korean adults. |
| <b>Methods</b>            |          |                                                                                                                                                                                                                                                                                                                                                                                                                                                           |                |                                                                                                                                   |
| Study design              | 4        | Present key elements of study design early in the paper                                                                                                                                                                                                                                                                                                                                                                                                   | Page 5         | KNHANES is a nationwide survey designed to assess national health and nutrition levels accurately                                 |
| Setting                   | 5        | Describe the setting, locations, and relevant dates, including periods of recruitment, exposure, follow-up, and data collection                                                                                                                                                                                                                                                                                                                           | Page 5         | This study was based on data collected during the 2010–2012 KNHANES (Korea Centers for Disease Control and Prevention)            |
| Participants              | 6        | (a) <i>Cohort study</i> —Give the eligibility criteria, and the sources and methods of selection of participants. Describe methods of follow-up<br><i>Case-control study</i> —Give the eligibility criteria, and the sources and methods of case ascertainment and control selection. Give the rationale for the choice of cases and controls<br><i>Cross-sectional study</i> —Give the eligibility criteria, and the sources and methods of selection of | Page 5         | The sample included 12,499 participants aged over 19 years.                                                                       |

1  
2  
3  
4  
5  
6  
7  
8  
9  
10  
11  
12  
13  
14  
15  
16  
17  
18  
19  
20  
21  
22  
23  
24  
25  
26  
27  
28  
29  
30  
31  
32  
33  
34  
35  
36  
37  
38  
39  
40  
41  
42  
43  
44  
45  
46  
47

---

participants

---

(b) *Cohort study*—For matched studies, give matching criteria and number of exposed and unexposed

*Case-control study*—For matched studies, give matching criteria and the number of controls per case

---

|           |   |                                                                                                                                          |                  |                                                                                                                                                             |
|-----------|---|------------------------------------------------------------------------------------------------------------------------------------------|------------------|-------------------------------------------------------------------------------------------------------------------------------------------------------------|
| Variables | 7 | Clearly define all outcomes, exposures, predictors, potential confounders, and effect modifiers. Give diagnostic criteria, if applicable | Page 5, 6, and 7 | tinnitus, Smoking history, alcohol absorption, Regular exercise, Weight and height, Body mass index (BMI), Waist circumference (WC), and Metabolic syndrome |
|-----------|---|------------------------------------------------------------------------------------------------------------------------------------------|------------------|-------------------------------------------------------------------------------------------------------------------------------------------------------------|

---

|                           |    |                                                                                                                                                                                      |        |                                                                                                                                                                                                                                                                 |
|---------------------------|----|--------------------------------------------------------------------------------------------------------------------------------------------------------------------------------------|--------|-----------------------------------------------------------------------------------------------------------------------------------------------------------------------------------------------------------------------------------------------------------------|
| Data sources/ measurement | 8* | For each variable of interest, give sources of data and details of methods of assessment (measurement). Describe comparability of assessment methods if there is more than one group | Page 5 | The survey consists of a health interview, a nutritional survey, and a health examination survey. The survey amasses data via household interviews and by direct standardized physical examinations conducted in specially equipped mobile examination centers. |
|---------------------------|----|--------------------------------------------------------------------------------------------------------------------------------------------------------------------------------------|--------|-----------------------------------------------------------------------------------------------------------------------------------------------------------------------------------------------------------------------------------------------------------------|

---

|      |   |                                                           |        |                                                                                                                                                                                                                                                              |
|------|---|-----------------------------------------------------------|--------|--------------------------------------------------------------------------------------------------------------------------------------------------------------------------------------------------------------------------------------------------------------|
| Bias | 9 | Describe any efforts to address potential sources of bias | Page 8 | We first adjusted for age (model 1), adjusted for age, BMI, smoking status, alcohol intake, and regular exercise (model 2), and adjusted for age, BMI, smoking status, alcohol intake, regular exercise, metabolic syndrome, stress, and tinnitus (model 3). |
|------|---|-----------------------------------------------------------|--------|--------------------------------------------------------------------------------------------------------------------------------------------------------------------------------------------------------------------------------------------------------------|

---

|            |    |                                           |        |                                                             |
|------------|----|-------------------------------------------|--------|-------------------------------------------------------------|
| Study size | 10 | Explain how the study size was arrived at | Page 5 | This study was based on data collected during the 2010–2012 |
|------------|----|-------------------------------------------|--------|-------------------------------------------------------------|

---

1  
2  
3  
4  
5  
6  
7  
8  
9  
10  
11  
12  
13  
14  
15  
16  
17  
18  
19  
20  
21  
22  
23  
24  
25  
26  
27  
28  
29  
30  
31  
32  
33  
34  
35  
36  
37  
38  
39  
40  
41  
42  
43  
44  
45  
46  
47

---

KNHANES (Korea Centers for  
Disease Control and  
Prevention).

---

Continued on next page

For peer review only

1  
2  
3  
4  
5  
6  
7  
8  
9  
10  
11  
12  
13  
14  
15  
16  
17  
18  
19  
20  
21  
22  
23  
24  
25  
26  
27  
28  
29  
30  
31  
32  
33  
34  
35  
36  
37  
38  
39  
40  
41  
42  
43  
44  
45  
46  
47

|                        |    |                                                                                                                              |                  |                                                                                                                                                                                                                                                                                                                                                                                                                                                                                                                                                                    |
|------------------------|----|------------------------------------------------------------------------------------------------------------------------------|------------------|--------------------------------------------------------------------------------------------------------------------------------------------------------------------------------------------------------------------------------------------------------------------------------------------------------------------------------------------------------------------------------------------------------------------------------------------------------------------------------------------------------------------------------------------------------------------|
| Quantitative variables | 11 | Explain how quantitative variables were handled in the analyses. If applicable, describe which groupings were chosen and why | Page 5, 6, and 7 | The BMD values of the lumbar spine (L1–L4), femoral neck, and total femur were measured using dual-energy X-ray absorptiometry (DXA) using a Discovery fan-beam densitometer (Hologic, Bedford, MA, USA) and the Hologic Discovery software (ver. 3.1). Smoking history was categorized into the three groups: current smoker, ex-smoker and non-smoker. Subjects who drank more than 30 g/day were designated as heavy drinkers. Regular exercise was defined as strenuous physical activity performed for at least 20 min at a time at least three times a week. |
| Statistical methods    | 12 | (a) Describe all statistical methods, including those used to control for confounding                                        | Page 6 and 7     | The prevalence and 95% confidence intervals (CIs) for dizziness were calculated. In the univariate analysis, the Rao-Scott chi-square test (using PROC SURVEYFREQ in SAS) and logistic regression analysis (using PROC SURVEYLOGISTIC in SAS) were used to test the association between gender and risk factors in a complex sampling design. Participants' characteristics were described using means and standard errors for continuous                                                                                                                          |

variables and numbers and percentages for categorical variables. A final logistic regression model was used to examine the association between sleep duration and dizziness.

|                                                                                                              |              |                                                                                                                                                                                                                                                                                                                                                                                                                        |
|--------------------------------------------------------------------------------------------------------------|--------------|------------------------------------------------------------------------------------------------------------------------------------------------------------------------------------------------------------------------------------------------------------------------------------------------------------------------------------------------------------------------------------------------------------------------|
| (b) Describe any methods used to examine subgroups and interactions                                          | Page 6 and 7 | Same as the above.                                                                                                                                                                                                                                                                                                                                                                                                     |
| (c) Explain how missing data were addressed                                                                  | Page 6 and 7 | Statistical analyses were performed using the SAS survey procedure (ver. 9.3; SAS Institute, Cary, NC, USA) to reflect the complex sampling design and sampling weights of KNHANES and to provide nationally representative prevalence estimates. The procedures included unequal probabilities of selection, oversampling, and nonresponse so that inferences could be made about the Korean adolescent participants. |
| (d) <i>Cohort study</i> —If applicable, explain how loss to follow-up was addressed                          |              |                                                                                                                                                                                                                                                                                                                                                                                                                        |
| <i>Case-control study</i> —If applicable, explain how matching of cases and controls was addressed           |              |                                                                                                                                                                                                                                                                                                                                                                                                                        |
| <i>Cross-sectional study</i> —If applicable, describe analytical methods taking account of sampling strategy |              |                                                                                                                                                                                                                                                                                                                                                                                                                        |
| (e) Describe any sensitivity analyses                                                                        |              |                                                                                                                                                                                                                                                                                                                                                                                                                        |

## Results

|              |     |                                                                                                                                                                                                   |        |                                                                                                                                                                    |
|--------------|-----|---------------------------------------------------------------------------------------------------------------------------------------------------------------------------------------------------|--------|--------------------------------------------------------------------------------------------------------------------------------------------------------------------|
| Participants | 13* | (a) Report numbers of individuals at each stage of study—eg numbers potentially eligible, examined for eligibility, confirmed eligible, included in the study, completing follow-up, and analysed | Page 9 | There were 12,499 respondents in our study, comprising 5406 (43.25%) males and 7093 (56.75%) females, and 2690 had experienced dizziness or imbalance in the prior |
|--------------|-----|---------------------------------------------------------------------------------------------------------------------------------------------------------------------------------------------------|--------|--------------------------------------------------------------------------------------------------------------------------------------------------------------------|



1  
2  
3  
4  
5  
6  
7  
8  
9  
10  
11  
12  
13  
14  
15  
16  
17  
18  
19  
20  
21  
22  
23  
24  
25  
26  
27  
28  
29  
30  
31  
32  
33  
34  
35  
36  
37  
38  
39  
40  
41  
42  
43  
44  
45  
46  
47

|                  |     |                                                                                                                                                                                                              |        |                                                                                                                                                                                                                                                                                                                                              |
|------------------|-----|--------------------------------------------------------------------------------------------------------------------------------------------------------------------------------------------------------------|--------|----------------------------------------------------------------------------------------------------------------------------------------------------------------------------------------------------------------------------------------------------------------------------------------------------------------------------------------------|
|                  |     |                                                                                                                                                                                                              |        | 12 months.                                                                                                                                                                                                                                                                                                                                   |
|                  |     | (b) Give reasons for non-participation at each stage                                                                                                                                                         | Page 9 | Same as the above.                                                                                                                                                                                                                                                                                                                           |
|                  |     | (c) Consider use of a flow diagram                                                                                                                                                                           |        |                                                                                                                                                                                                                                                                                                                                              |
| Descriptive data | 14* | (a) Give characteristics of study participants (eg demographic, clinical, social) and information on exposures and potential confounders                                                                     | Page 9 | The baseline characteristics of the study subjects according to gender are shown in Table 1.                                                                                                                                                                                                                                                 |
|                  |     | (b) Indicate number of participants with missing data for each variable of interest                                                                                                                          | Page 9 | There were 12,499 respondents in our study, comprising 5406 (43.25%) males and 7093 (56.75%) females, and 2690 had experienced dizziness or imbalance in the prior 12 months.                                                                                                                                                                |
|                  |     | (c) Cohort study—Summarise follow-up time (eg, average and total amount)                                                                                                                                     |        |                                                                                                                                                                                                                                                                                                                                              |
| Outcome data     | 15* | Cohort study—Report numbers of outcome events or summary measures over time                                                                                                                                  |        |                                                                                                                                                                                                                                                                                                                                              |
|                  |     | Case-control study—Report numbers in each exposure category, or summary measures of exposure                                                                                                                 |        |                                                                                                                                                                                                                                                                                                                                              |
|                  |     | Cross-sectional study—Report numbers of outcome events or summary measures                                                                                                                                   | Page 9 | There were 12,499 respondents in our study, comprising 5406 (43.25%) males and 7093 (56.75%) females, and 2690 had experienced dizziness or imbalance in the prior 12 months.                                                                                                                                                                |
| Main results     | 16  | (a) Give unadjusted estimates and, if applicable, confounder-adjusted estimates and their precision (eg, 95% confidence interval). Make clear which confounders were adjusted for and why they were included | Page 9 | The adjusted OR for sleep duration is not significant in dizziness for men. Meanwhile, the risk of dizziness was significantly associated with sleep duration in only women. Compared to participants with optimal sleep duration (six to eight hours), those with severe short sleep duration ( $\leq 5$ hours) (OR [95% CI]: 1.566 [1.289- |

1  
2  
3  
4  
5  
6  
7  
8  
9  
10  
11  
12  
13  
14  
15  
16  
17  
18  
19  
20  
21  
22  
23  
24  
25  
26  
27  
28  
29  
30  
31  
32  
33  
34  
35  
36  
37  
38  
39  
40  
41  
42  
43  
44  
45  
46  
47

For peer review only

1.903] in model 1, OR [95% CI]: 1.557 [1.276-1.898] in model 2, and OR [95% CI]: 1.473 [1.194-1.818] in model 3) and severe long sleep duration ( $\geq 9$  hours) (OR [95% CI]: 1.420 [1.042-1.936] in model 1, OR [95% CI]: 1.418 [1.040-1.934] in model 2, and OR [95% CI]: 1.472 [1.078-2.009] in model 3) had an increased dizziness risk after adjusting for the confounders.

(b) Report category boundaries when continuous variables were categorized

Page 9

Among variables regarding health behavior patterns, current smoker, heavy drinker, routine exercise, job, and waist circumference were significantly associated with men.

(c) If relevant, consider translating estimates of relative risk into absolute risk for a meaningful time period

Continued on next page

1  
2  
3  
4  
5  
6  
7  
8  
9  
10  
11  
12  
13  
14  
15  
16  
17  
18  
19  
20  
21  
22  
23  
24  
25  
26  
27  
28  
29  
30  
31  
32  
33  
34  
35  
36  
37  
38  
39  
40  
41  
42  
43  
44  
45  
46  
47

---

|                |    |                                                                                                |  |  |
|----------------|----|------------------------------------------------------------------------------------------------|--|--|
| Other analyses | 17 | Report other analyses done—eg analyses of subgroups and interactions, and sensitivity analyses |  |  |
|----------------|----|------------------------------------------------------------------------------------------------|--|--|

---

**Discussion**

|             |    |                                                          |         |                                                                                               |
|-------------|----|----------------------------------------------------------|---------|-----------------------------------------------------------------------------------------------|
| Key results | 18 | Summarise key results with reference to study objectives | Page 10 | abnormal sleep duration such as short or long duration are associated with dizziness in women |
|-------------|----|----------------------------------------------------------|---------|-----------------------------------------------------------------------------------------------|

---

|             |    |                                                                                                                                                            |         |                                                                                                                                                                                                                                                                                                                                                                                                                                                                                                                                                                                                                                                                                                                                                                                                                                                                          |
|-------------|----|------------------------------------------------------------------------------------------------------------------------------------------------------------|---------|--------------------------------------------------------------------------------------------------------------------------------------------------------------------------------------------------------------------------------------------------------------------------------------------------------------------------------------------------------------------------------------------------------------------------------------------------------------------------------------------------------------------------------------------------------------------------------------------------------------------------------------------------------------------------------------------------------------------------------------------------------------------------------------------------------------------------------------------------------------------------|
| Limitations | 19 | Discuss limitations of the study, taking into account sources of potential bias or imprecision. Discuss both direction and magnitude of any potential bias | Page 12 | By contrast, this study also had several limitations. First, sleep duration and dizziness were reported only by respondents and were not recorded or observed directly. This may bias our results, as there is only modest correlation between reported and recorded sleep. Although there were some researches with objective sleep data, those measures are not practical for large, nationally representative samples. Furthermore, self-reported sleep duration has been used widely in epidemiological studies examining the relationship between sleep duration and morbidity and mortality. Secondly, our data consider only abnormal duration of sleep. Additional sleep problems, such as snoring, apnea and daytime sleepiness, should be investigated in future studies. Third, the related variables of which the presence or absence may be associated with |
|-------------|----|------------------------------------------------------------------------------------------------------------------------------------------------------------|---------|--------------------------------------------------------------------------------------------------------------------------------------------------------------------------------------------------------------------------------------------------------------------------------------------------------------------------------------------------------------------------------------------------------------------------------------------------------------------------------------------------------------------------------------------------------------------------------------------------------------------------------------------------------------------------------------------------------------------------------------------------------------------------------------------------------------------------------------------------------------------------|

---

For peer review only

|                          |    |                                                                                                                                                                            |         |                                                                                                                                                                                                                |
|--------------------------|----|----------------------------------------------------------------------------------------------------------------------------------------------------------------------------|---------|----------------------------------------------------------------------------------------------------------------------------------------------------------------------------------------------------------------|
|                          |    |                                                                                                                                                                            |         | vestibular dysfunction and could affect the results were not able to be evaluated and the participants with other acute disease status, such as BPPV, were not able to be excluded from this study.            |
| Interpretation           | 20 | Give a cautious overall interpretation of results considering objectives, limitations, multiplicity of analyses, results from similar studies, and other relevant evidence | Page 12 | Same as the above.                                                                                                                                                                                             |
| Generalisability         | 21 | Discuss the generalisability (external validity) of the study results                                                                                                      | Page 13 | KNHANES is a nationwide cross-sectional study to select a representative sample of the Korean population. This survey employed stratified multi-stage design based on age, sex, and residence geographic area. |
| <b>Other information</b> |    |                                                                                                                                                                            |         |                                                                                                                                                                                                                |
| Funding                  | 22 | Give the source of funding and the role of the funders for the present study and, if applicable, for the original study on which the present article is based              |         | No funding source                                                                                                                                                                                              |

\*Give information separately for cases and controls in case-control studies and, if applicable, for exposed and unexposed groups in cohort and cross-sectional studies.

**Note:** An Explanation and Elaboration article discusses each checklist item and gives methodological background and published examples of transparent reporting. The STROBE checklist is best used in conjunction with this article (freely available on the Web sites of PLoS Medicine at <http://www.plosmedicine.org/>, Annals of Internal Medicine at <http://www.annals.org/>, and Epidemiology at <http://www.epidem.com/>). Information on the STROBE Initiative is available at [www.strobe-statement.org](http://www.strobe-statement.org).
